# Supplementary material
Source: PubMed Central journal article supplement (PMC2676672)
Supplement: NIHMS104933-supplement-3_si_003.pdf [file NIHMS104933-supplement-3_si_003.pdf]

# Supplementary Information

## **“*anti*-Aminoallylation of Aldehydes *via* Ruthenium Catalyzed Reductive Transfer Hydrogenative Coupling of Sulfonamido-Allenes: 1,2-Aminoalcohols”**

Eduardas Skucas, Jason R. Zbieg and Michael J. Krische\*

University of Texas at Austin  
Department of Chemistry and Biochemistry  
Austin, TX 78712  
USA

### Table of Contents

|                                                           |         |
|-----------------------------------------------------------|---------|
| General Experimental Details -----                        | S2      |
| Procedure for the Preparation of Allenamide-----          | S3      |
| Preparation of Aldehyde <b>2i</b> -----                   | S6      |
| General Procedure for Reductive Coupling-----             | S7      |
| Spectroscopic Data for Coupling Products -----            | S7-S33  |
| Spectroscopic Data for Products Indicated in Table 3----- | S34-S43 |
| Spectroscopic Data for <i>deuterio</i> - <b>3a</b> -----  | S44-S45 |
| Crystallographic Data for <b>3a</b> -----                 | S46-S60 |
| Crystallographic Data for <b>3m</b> -----                 | S61-S74 |

**General Experimental Details.** All reactions were run under an atmosphere of argon, unless otherwise indicated. Anhydrous solvents were transferred *via* oven-dried syringe. Reaction tubes were oven-dried and cooled under a stream of argon. Reaction tubes were purchased from Fischer Scientific (catalog number 14-959-35C). Tetrahydrofuran was obtained from solvent delivery system (Innovative Technology Inc. Ps-MD-5). RuBr(CO)<sub>3</sub>( $\eta^3$ -C<sub>3</sub>H<sub>5</sub>) was prepared according to the literature procedure.<sup>1</sup> Cy<sub>3</sub>P was used as received from Strem Chemicals. Anhydrous isopropanol was used as received from Acros. *tert*-Butyl allene was prepared according to the literature procedure.<sup>2</sup> Aldehydes were purified by distillation or recrystallisation immediately prior to use. Analytical thin-layer chromatography (TLC) was carried out using 0.2-mm commercial silica gel plates (DC-Fertigplatten Kieselgel 60 F<sub>254</sub>). Preparative column chromatography employing silica gel was performed according to the method of Still.<sup>3</sup> Solvents for chromatography are listed as volume/volume ratios. Infrared spectra were recorded on a Perkin-Elmer 1600 spectrometer. High-resolution mass spectra (HRMS) were obtained on a Karatos MS9 and are reported as m/z (relative intensity). Accurate masses are reported for the molecular ion [M+H]<sup>+</sup> or a suitable fragment ion. Melting points were obtained on a Thomas-Hoover Unimelt apparatus and are uncorrected. Proton nuclear magnetic resonance (<sup>1</sup>H NMR) spectra were recorded with a Varian Gemini (400 MHz or 300MHz) spectrometer. Chemical shifts are reported in delta ( $\delta$ ) units, parts per million (ppm) downfield from trimethylsilane or ppm relative to the center of the singlet at 7.26 ppm for deuteriochloroform. Coupling constants are reported in Hertz (Hz). Carbon-13 nuclear magnetic resonance (<sup>13</sup>C NMR) spectra were recorded with a Varian Gemini 300 (75 MHz) or 400 (100 MHz) spectrometer. Chemical shifts are reported in delta ( $\delta$ ) units, ppm relative to the center of the triplet at 77.0 ppm for deuteriochloroform. <sup>13</sup>C NMR spectra were routinely run with broadband decoupling.

---

<sup>1</sup> Sbrana, G.; Braca, G.; Piacenti, F.; Pino, P. *J. Organometal. Chem.* **1968**, *13*, 240

<sup>2</sup> Brandsma, L. *Synthesis of Acetylenes, Allenes and Cumulenes Methods and Techniques*; Elsevier Publishing Co.: Amsterdam, 2004; pp 244-245

<sup>3</sup> Still, W.C.; Kahn, M.; Mitra, A. *J. Org. Chem.* **1978**, *43*, 2923

## General Procedure for the Preparation of Allene 1e

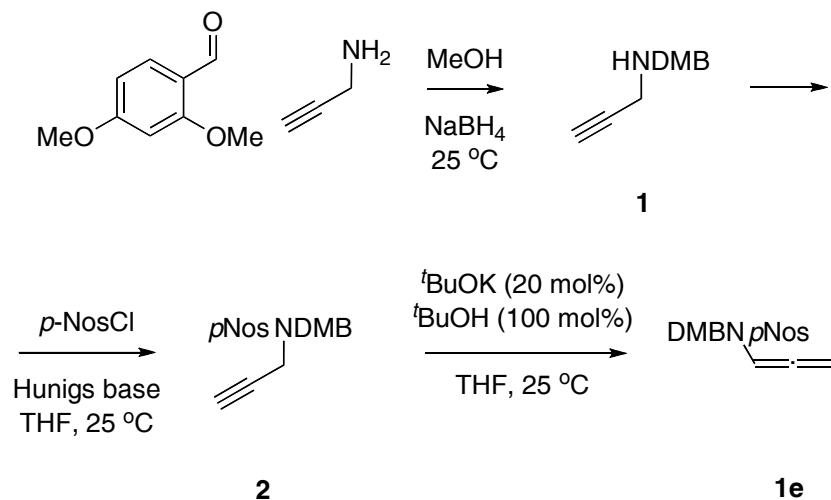

### 2,4-Dimethoxybenzyl Protection:

To a stirred solution of 2,4-dimethoxybenzaldehyde (100 mol%) in dry MeOH (0.3 M) under nitrogen at 25 °C was added propargyl amine (120 mol%). The resulting mixture was allowed to stir for 3.5 hours at ambient temperature, at which point the mixture was cooled to 0 °C using an ice bath. Sodium borohydride (200 mol%) was added portion wise over 10 min. The ice bath was removed and the reaction mixture was allowed to warm to ambient temperature and was allowed to stir for 3 hours, at which point saturated solution of NH<sub>4</sub>Cl (aq.) was added to the reaction mixture drop-wise. The mixture was transferred to a separatory funnel. The organic layer was separated. The aqueous layer was extracted twice with EtOAc and the combined organic layers were dried (Mg<sub>2</sub>SO<sub>4</sub>), filtered and the filtrate was concentrated *in vacuo* to furnish an oily residue that was purified by flash column chromatography (SiO<sub>2</sub>, 30% EtOAc/hexanes).

### *p*-Nitrobenzenesulfonamide Protection:

To a stirred solution of compound 1 (100 mol%) in dry THF (0.4 M) under nitrogen at 25 °C was added *N,N*-diisopropylethylamine (160 mol%). The resulting mixture was cooled to 0 °C using an ice bath and a solution of *p*-nitrophenylsulfonyl chloride (130 mol%) in dry THF (0.4 M) was added dropwise over 5 min. The ice bath was removed and the reaction mixture was allowed to warm to ambient temperature and was allowed to stir for 14 hours. Water was added drop-wise to the reaction mixture. The reaction mixture was transferred to a separatory funnel. The organic layer was separated. The aqueous layer was extracted three times with EtOAc and the combined organic layers were washed with aqueous HCl (3 N), dried (Mg<sub>2</sub>SO<sub>4</sub>), filtered and the filtrate was concentrated *in vacuo* and purified by flash column chromatography (SiO<sub>2</sub>, 10% EtOAc/toluene).

### Preparation of Allene **1e**:

To a stirred solution of compound **2** (3.0 g, 7.7 mmol, 100 mol%) in dry THF (38.5 mL, 0.2 M with respect to **2**) under nitrogen at 25 °C was added *t*-BuOH (0.736 mL, 7.7 mmol, 100 mol%) followed by drop-wise addition of 1.0M *t*-BuOK in THF (1.54 mL, 1.54 mmol, 20 mol%). The resulting reaction mixture was stirred until the complete consumption of **2** was observed, as determined by TLC analysis. The reaction mixture was filtered through a pad of Celite, concentrated *in vacuo* and purified by flash column chromatography (SiO<sub>2</sub>: toluene) to furnish the title compound (2.28 g, 76%) as a yellow solid. Allene **1e** was recrystallized from DCM/hexanes (1:3) at -4 °C.

### ***N*-(2,4-dimethoxybenzyl)-4-nitro-*N*-(propa-1,2-dienyl)benzenesulfonamide (**1e**)**

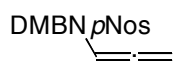

**<sup>1</sup>H NMR** (400 MHz, CDCl<sub>3</sub>): δ 8.32 (d, *J* = 8.4 Hz, 2H), 7.95 (d, *J* = 8.4 Hz, 2H), 7.19 (d, *J* = 8.4 Hz, 1H), 6.80 (t, *J* = 6.0 Hz, 1H), 6.40 (dd, *J* = 8.4, 2.4 Hz, 1H), 6.33 (d, *J* = 2.4 Hz, 1H), 5.15 (d, *J* = 6.0 Hz, 2H), 4.34 (s, 2H), 3.78 (s, 3H), 3.71 (s, 3H).

**<sup>13</sup>C NMR** (100 MHz, CDCl<sub>3</sub>): δ 201.8, 160.5, 157.7, 150.0, 144.2, 129.1, 128.3, 115.6, 104.0, 99.6, 98.1, 88.0, 55.3, 55.1, 45.0.

**HRMS** (CI): Calcd. for C<sub>18</sub>H<sub>19</sub>N<sub>2</sub>O<sub>6</sub>S (M+1): 391.0964, Found: 391.0965

**FTIR** (neat): 1588, 1532, 1505, 1348, 1212, 1170, 1118, 1033, 862 cm<sup>-1</sup>.

**M.P.** 113 – 115 °C

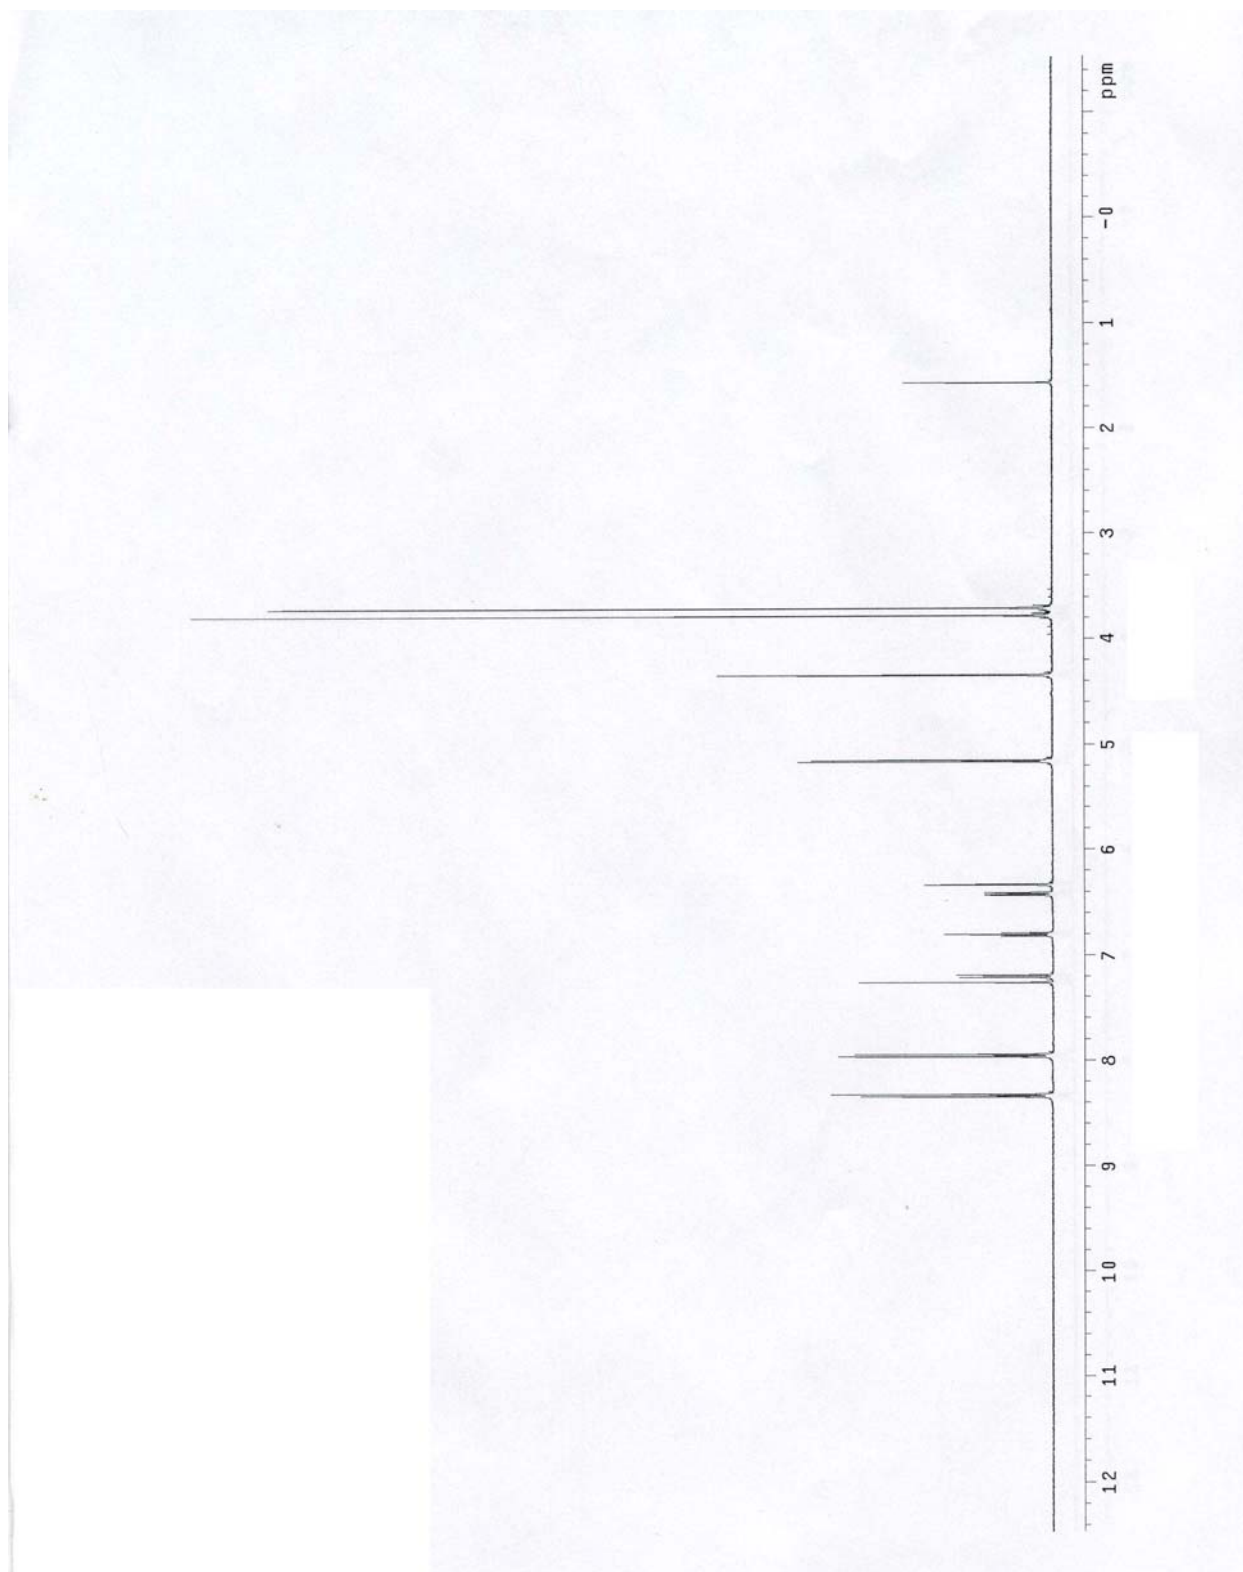

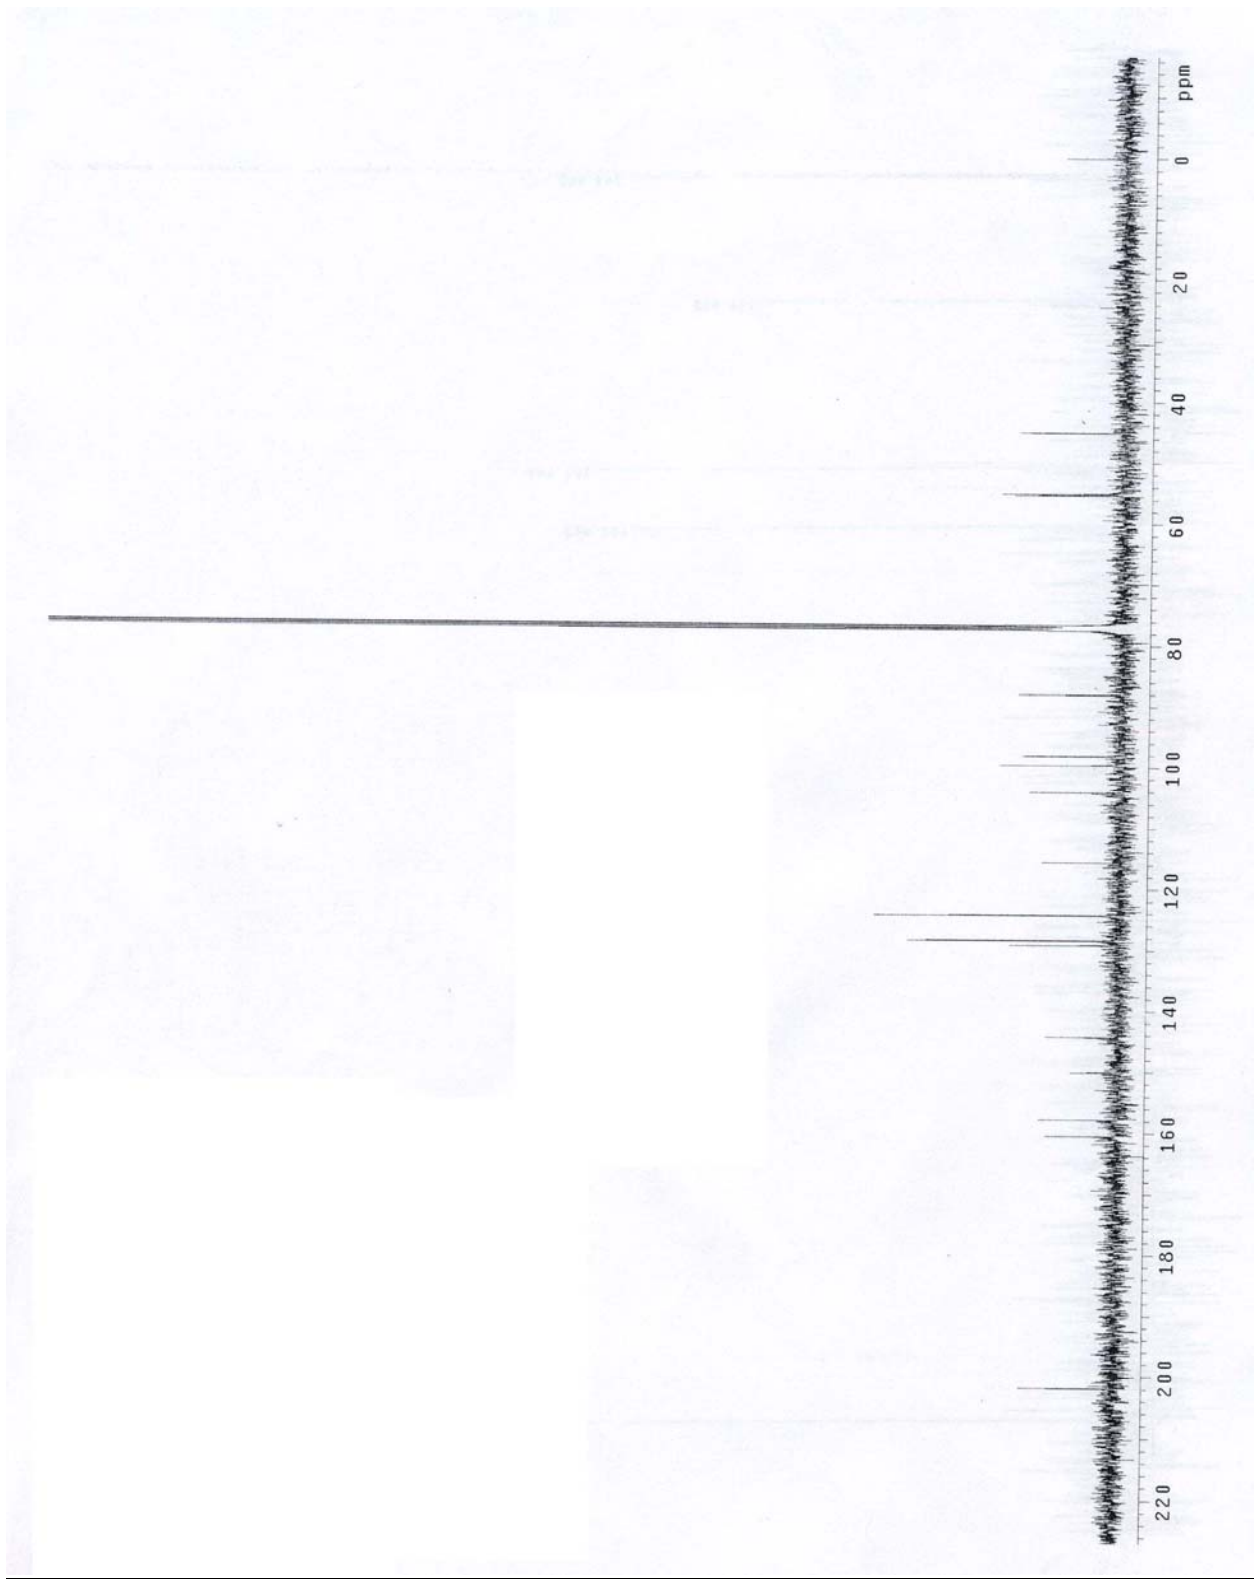

Preparation of Aldehyde **2i**:

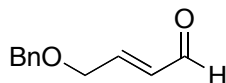

To a stirred solution of *cis*-1,4-dibenzyloxy-2-butene (1.00g, 3.7 mmol, 100 mol%) in dry DCM (37 mL, 0.1 M with respect to *cis*-1,4-dibenzyloxy-2-butene) under nitrogen at 25 °C was added acrolein (0.75 mL, 11.1 mmol, 300 mol%). Grubbs second generation catalyst (0.158 g, 0.185 mmol, 5 mol%) was added and reaction was allowed to stir until complete consumption of *cis*-1,4-dibenzyloxy-2-butene was observed, as determined by TLC analysis. The reaction mixture was filtered through a pad of Celite, concentrated *in vacuo* and purified by flash column chromatography (SiO<sub>2</sub>, 20% EtOAc/Hex) to furnish the title compound (1.30 g) as a colorless oil in 99% yield. *The spectroscopic properties of this compound were consistent with the data available in the literature.*<sup>4</sup>

**<sup>1</sup>H NMR** (300 MHz, CDCl<sub>3</sub>): δ 9.60 (d, *J* = 7.8 Hz, 1H), 7.40-7.30 (m, 5H), 6.87 (dt, *J* = 15.9, 6.0 Hz, 1H), 6.42 (ddt, *J* = 15.9, 7.8, 1.8 Hz, 1H), 4.61 (s, 2H), 4.31 (dd, *J* = 6.0, 1.8 Hz, 2H)

---

<sup>4</sup> Fournier, J.; Mathieu, S.; Charette, A.. *J. Am. Chem. Soc.* **2005**, *127* (38), 13140–1314.

**General Procedure for the Coupling of Allenamide to Aldehydes:** To a re-sealable pressure tube (13 x 100 mm) equipped with magnetic stir bar was added RuBr(CO)<sub>3</sub>(η<sup>3</sup>-C<sub>3</sub>H<sub>5</sub>) (3.1 mg, 0.01 mmol, 5 mol%) and Cy<sub>3</sub>P (8.4 mg, 0.03 mmol, 15 mol%). Aldehyde (0.200 mmol, 100 mol%) and allene (0.300 mmol, 150 mol%) were added and the tube was sealed with a rubber septum and purged with argon. THF (0.2 mL, 1.0 M concentration with respect to aldehyde) and isopropanol (61 μL, 0.800 mmol, 400 mol%) were added and the rubber septum was quickly replaced with a screw cap. The mixture was heated at 100 °C (oil bath temperature) for the time stated. The reaction mixture was then concentrated *in vacuo* and purified by flash column chromatography (SiO<sub>2</sub>) under the conditions noted to furnish the corresponding product of *anti*-aminoallylation.

***N*-(2,4-dimethoxybenzyl)-*N*-(1-hydroxy-1-(4-nitrophenyl)but-3-en-2-yl)-4-nitrobenzenesulfonamide (3a)**

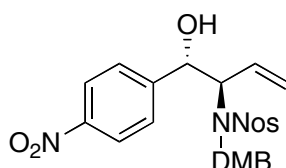

In accordance with the general procedure, the reaction was allowed to stir at 100 °C for 14 hours, at which point the mixture was concentrated *in vacuo* and purified by flash column chromatography (SiO<sub>2</sub>: 25% EtOAc/cyclohexane) to furnish the title compound (99 mg) as a yellow solid in 91% yield. Single crystals suitable for X-ray diffraction analysis were obtained by slow evaporation from chloroform.

**<sup>1</sup>H NMR** (400 MHz, DMSO): δ 8.25 (d, *J* = 9.0 Hz, 2H), 8.06 (d, *J* = 8.8 Hz, 2H), 7.89 (d, *J* = 9.0 Hz, 2H), 7.37 (d, *J* = 8.8 Hz, 2H), 6.87 (d, *J* = 8.4 Hz, 1H), 6.36 (d, *J* = 2.4 Hz, 1H), 6.29 (dd, *J* = 8.4, 2.4 Hz, 1H), 5.91 (ddd, *J* = 17.2, 10.4, 7.2 Hz, 1H), 5.86 (d, *J* = 5.2 Hz, 1H), 5.07 (d, *J* = 10.4 Hz, 1H), 4.95 (d, *J* = 17.6 Hz, 1H), 4.95 (d, *J* = 6.8 Hz, 1H), 4.31 (s, 2H), 4.24 (dd, *J* = 7.2, 6.8 Hz, 1H), 3.70 (s, 3H), 3.64 (s, 3H).

**<sup>1</sup>H NMR** (400 MHz, CDCl<sub>3</sub>): δ 8.25 (d, *J* = 9.0 Hz, 2H), 8.11 (d, *J* = 8.8 Hz, 2H), 7.85 (d, *J* = 9.0 Hz, 2H), 7.37 (d, *J* = 8.8 Hz, 2H), 7.13 (d, *J* = 8.4 Hz, 1H), 6.39 (dd, *J* = 8.4, 2.4 Hz, 1H), 6.30 (d, *J* = 2.4 Hz, 1H), 6.07 (ddd, *J* = 17.2, 10.4, 7.2 Hz, 1H), 5.21 (d, *J* = 10.4 Hz, 1H), 5.20 (d, *J* = 5.2 Hz, 1H), 4.95 (d, *J* = 17.2 Hz, 1H), 4.32 (d, *J* = 14.7 Hz, 1H), 4.25 – 4.24 (m, 1H), 4.25 (d, *J* = 14.7 Hz, 1H), 3.79 (s, 3H), 3.69 (s, 3H), 2.89 (s, 1H).

**<sup>13</sup>C NMR** (100 MHz, DMSO): δ 160.9, 158.9, 151.2, 150.0, 147.2, 146.6, 132.8, 131.8, 131.9, 129.4, 128.6, 124.8, 123.5, 121.6, 116.6, 105.2, 98.5, 74.4, 67.3, 55.8, 45.1.

**HRMS** (EI): Calcd. for C<sub>25</sub>H<sub>24</sub>N<sub>3</sub>O<sub>9</sub>S (M-1) : 542.1239, Found : 542.1238

**FTIR** (neat): 3521, 3108, 2940, 2896, 2359, 1609, 1587, 1510, 1421, 1310, 1269, 1158 cm<sup>-1</sup>.

**M.P.** 191-194 °C



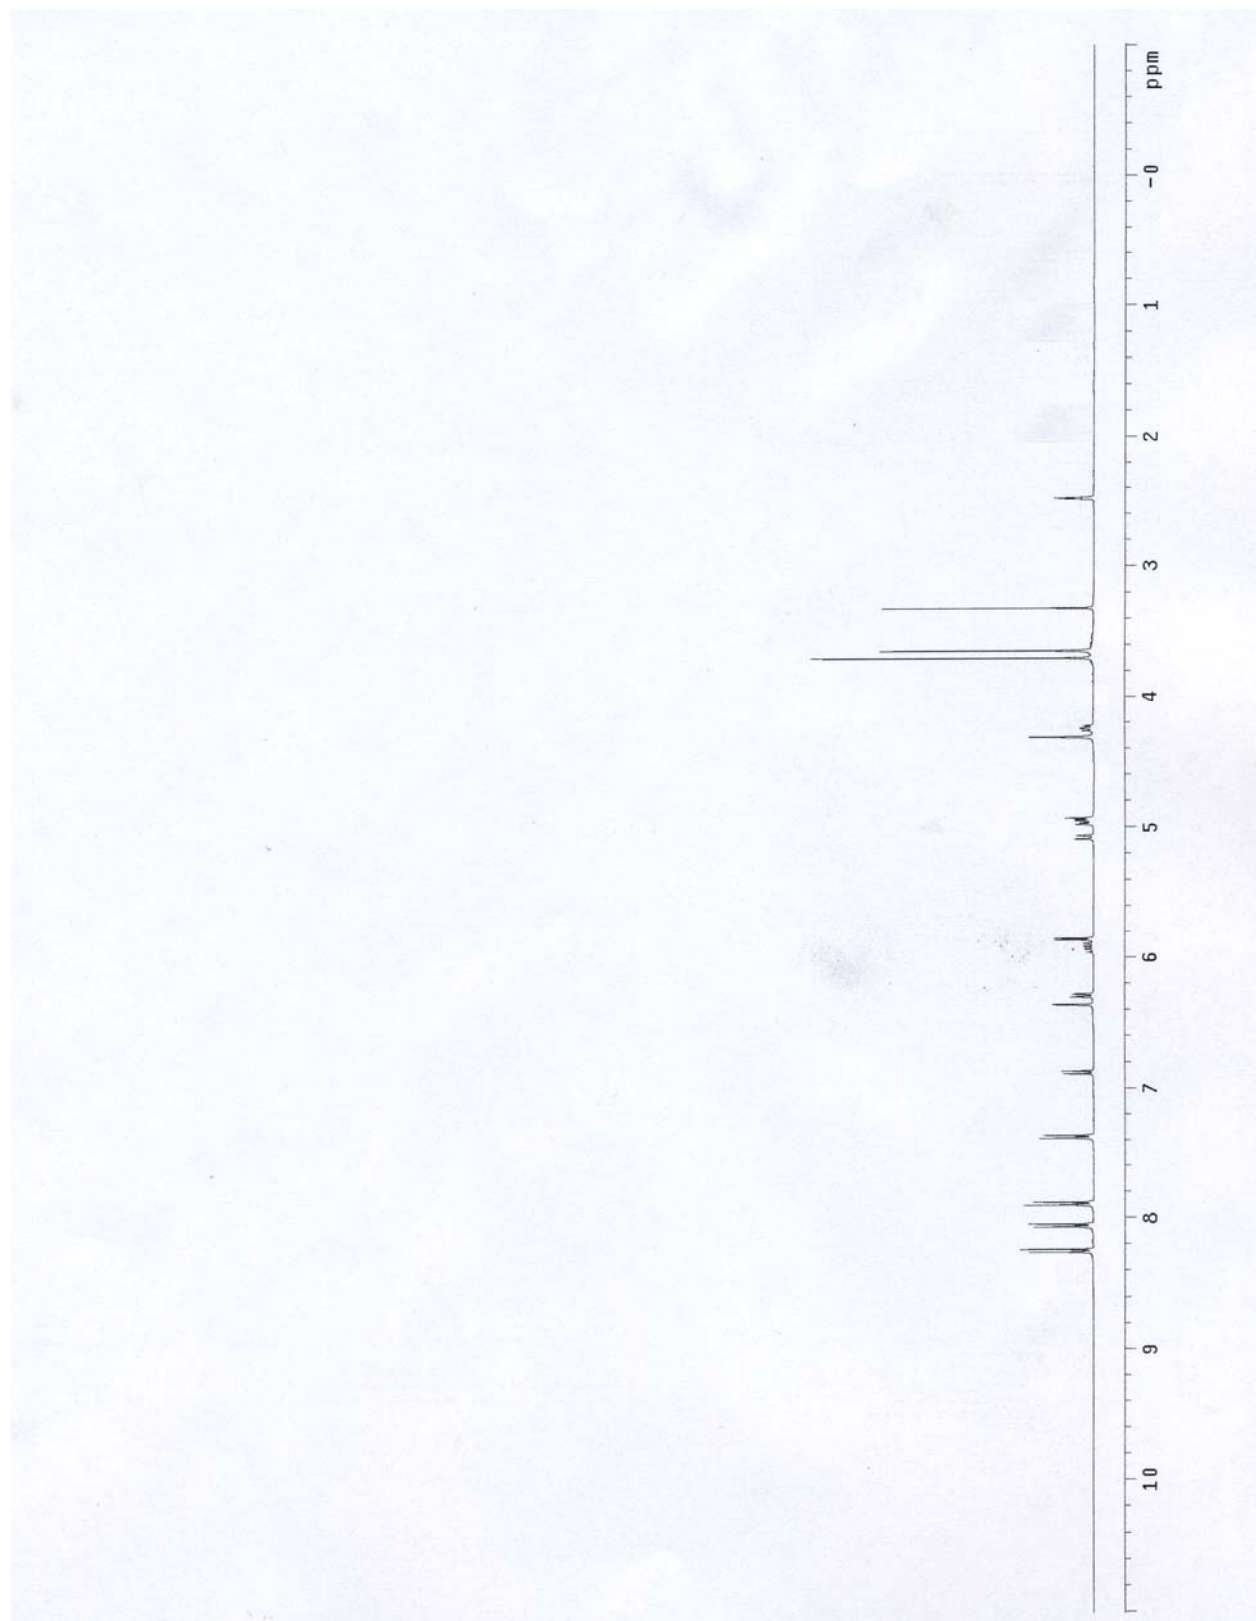

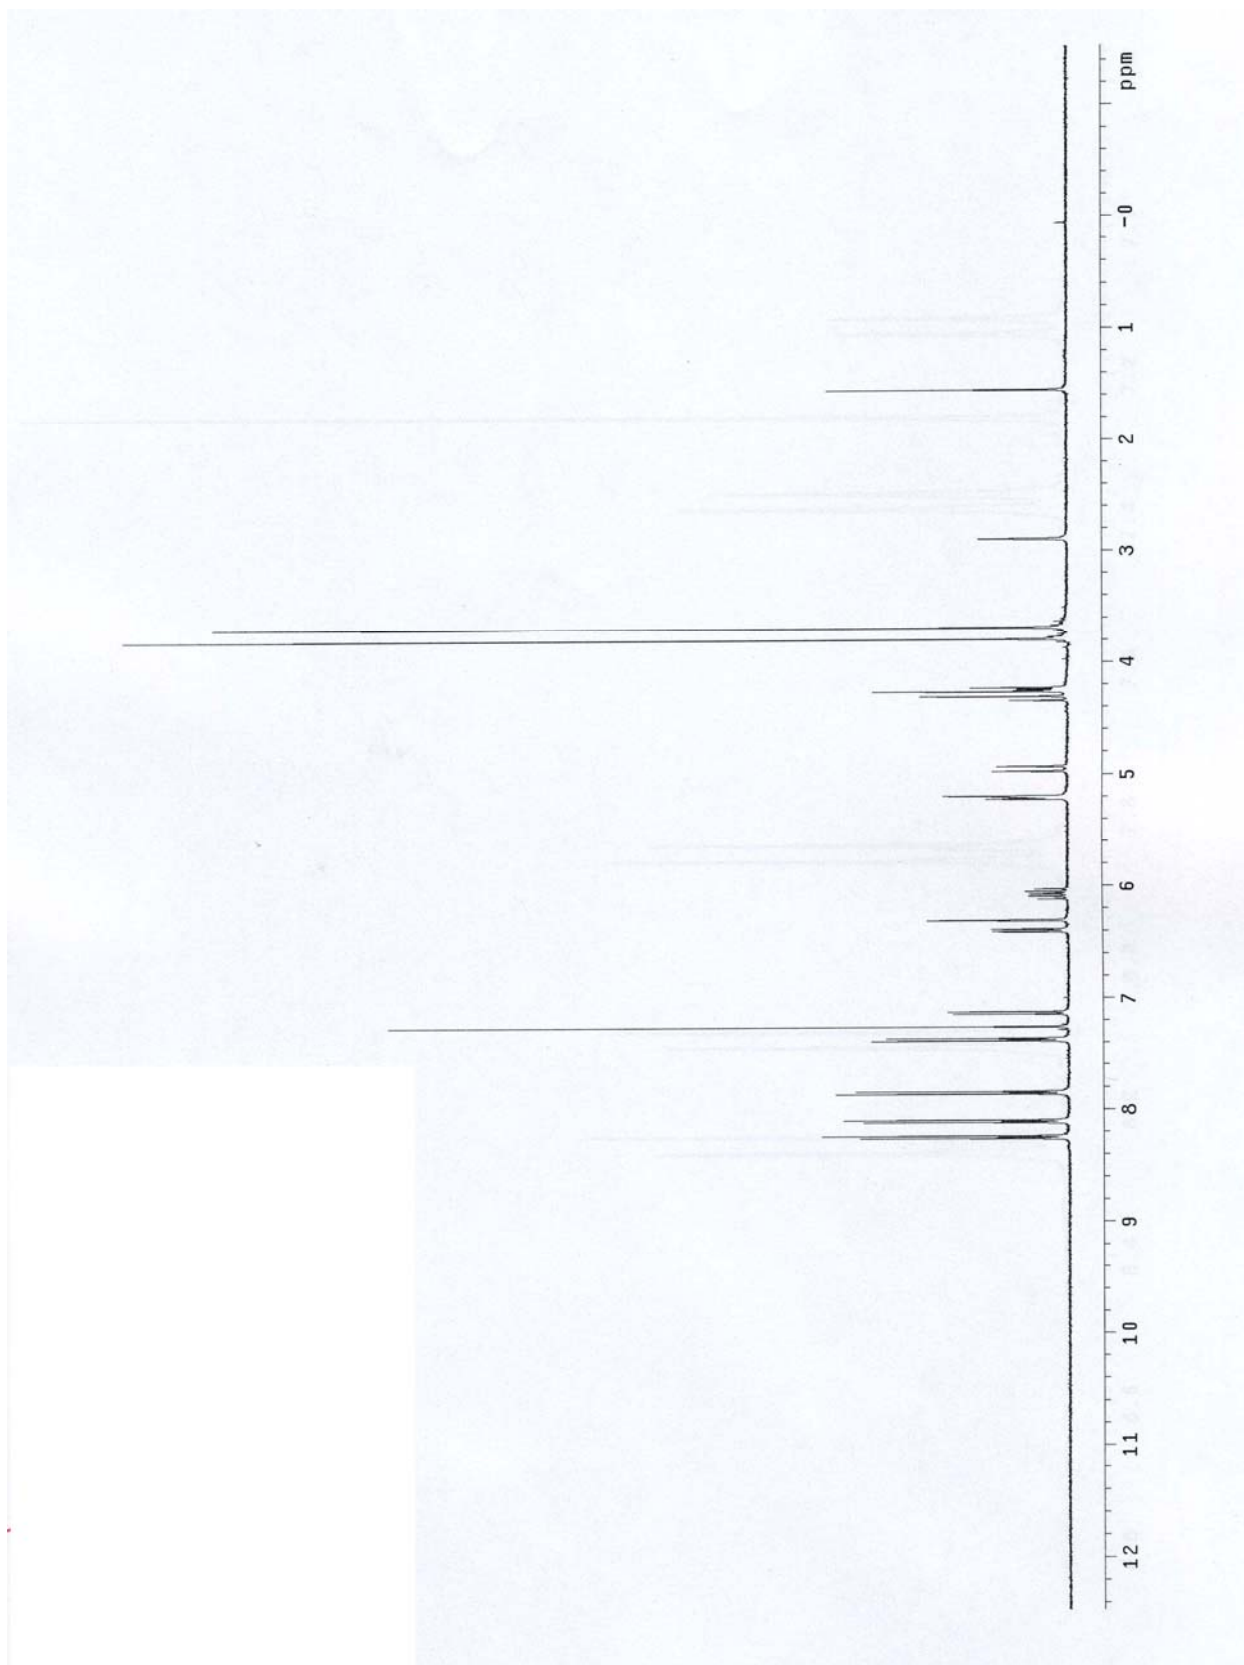

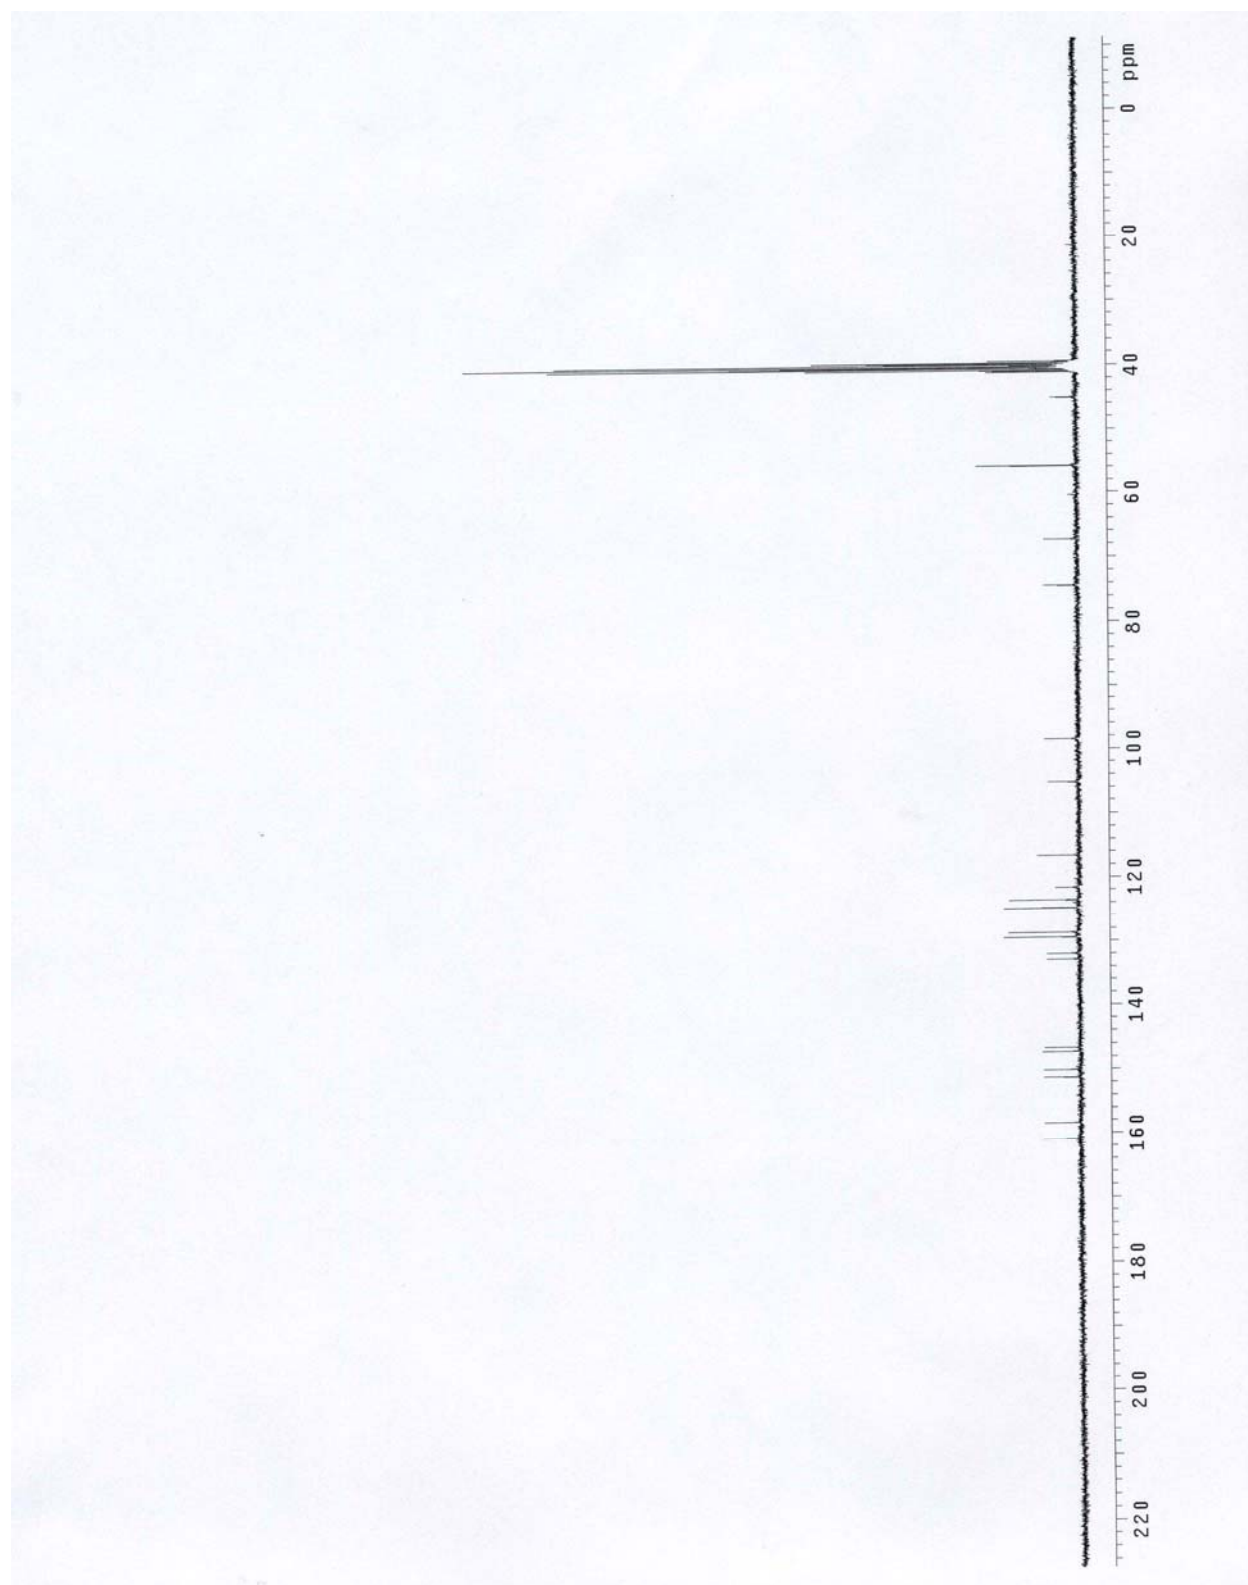

***N*-(2,4-dimethoxybenzyl)-*N*-(1-hydroxy-1-phenylbut-3-en-2-yl)-4-nitrobenzenesulfonamide (3b)**

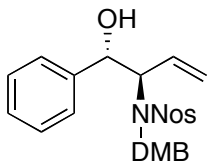

In a modification of the general procedure employing 200 mol% of allene **1e** (0.4 mmol), the reaction was allowed to stir at 100 °C for 16 hours, at which point the reaction mixture was concentrated *in vacuo* and purified by flash column chromatography (SiO<sub>2</sub>: 0-25% EtOAc/cyclohexane) to furnish the title compound (70 mg) as a yellow oil in 70% yield.

**<sup>1</sup>H NMR** (400 MHz, CDCl<sub>3</sub>): δ 8.14 (d, *J* = 8.8 Hz, 2H), 7.80 (d, *J* = 8.8 Hz, 2H), 7.22 – 7.29 (m, 5H), 7.13 (d, *J* = 8.8 Hz, 1H), 6.40 (dd, *J* = 8.8, 2.4 Hz, 1H), 6.26 (d, *J* = 2.4 Hz, 1H), 6.10 (ddd, *J* = 17.2, 10.4, 6.8 Hz, 1H) 5.23 (d, *J* = 10.4 Hz, 1H), 5.10 (dd, *J* = 5.2, 2.4 Hz, 1H), 4.99 (d, *J* = 17.2 Hz, 1H), 4.41 (dd, *J* = 6.8, 5.2 Hz, 1H), 4.28 (s, 2H), 3.78 (s, 3H), 3.62 (s, 3H), 2.60 (d, *J* = 2.4 Hz, 1H).

**<sup>13</sup>C NMR** (75 MHz, CDCl<sub>3</sub>): δ 161.4, 158.4, 149.7, 147.0, 140.9, 132.3, 131.4, 128.8, 128.5, 128.1, 127.0, 123.8, 122.3, 116.1, 104.7, 98.4, 76.2, 68.4, 55.7, 55.3, 46.4.

**HRMS** (EI): Calcd. for C<sub>25</sub>H<sub>26</sub>N<sub>2</sub>O<sub>7</sub>SNa (M+23): 521.1348, Found: 521.1353

**FTIR** (neat) – 3530, 2937, 2361, 1612, 1529, 1509, 1349, 1295, 1209, 1160, 1132, 1107, 1090, 1036 cm<sup>-1</sup>.

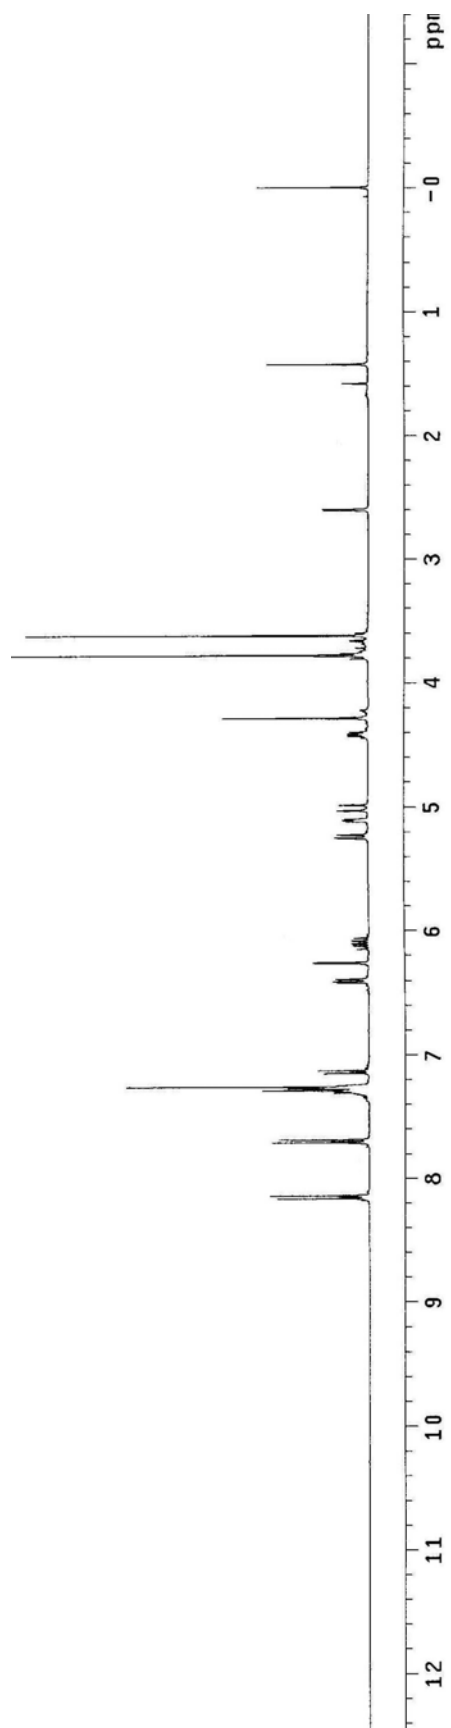

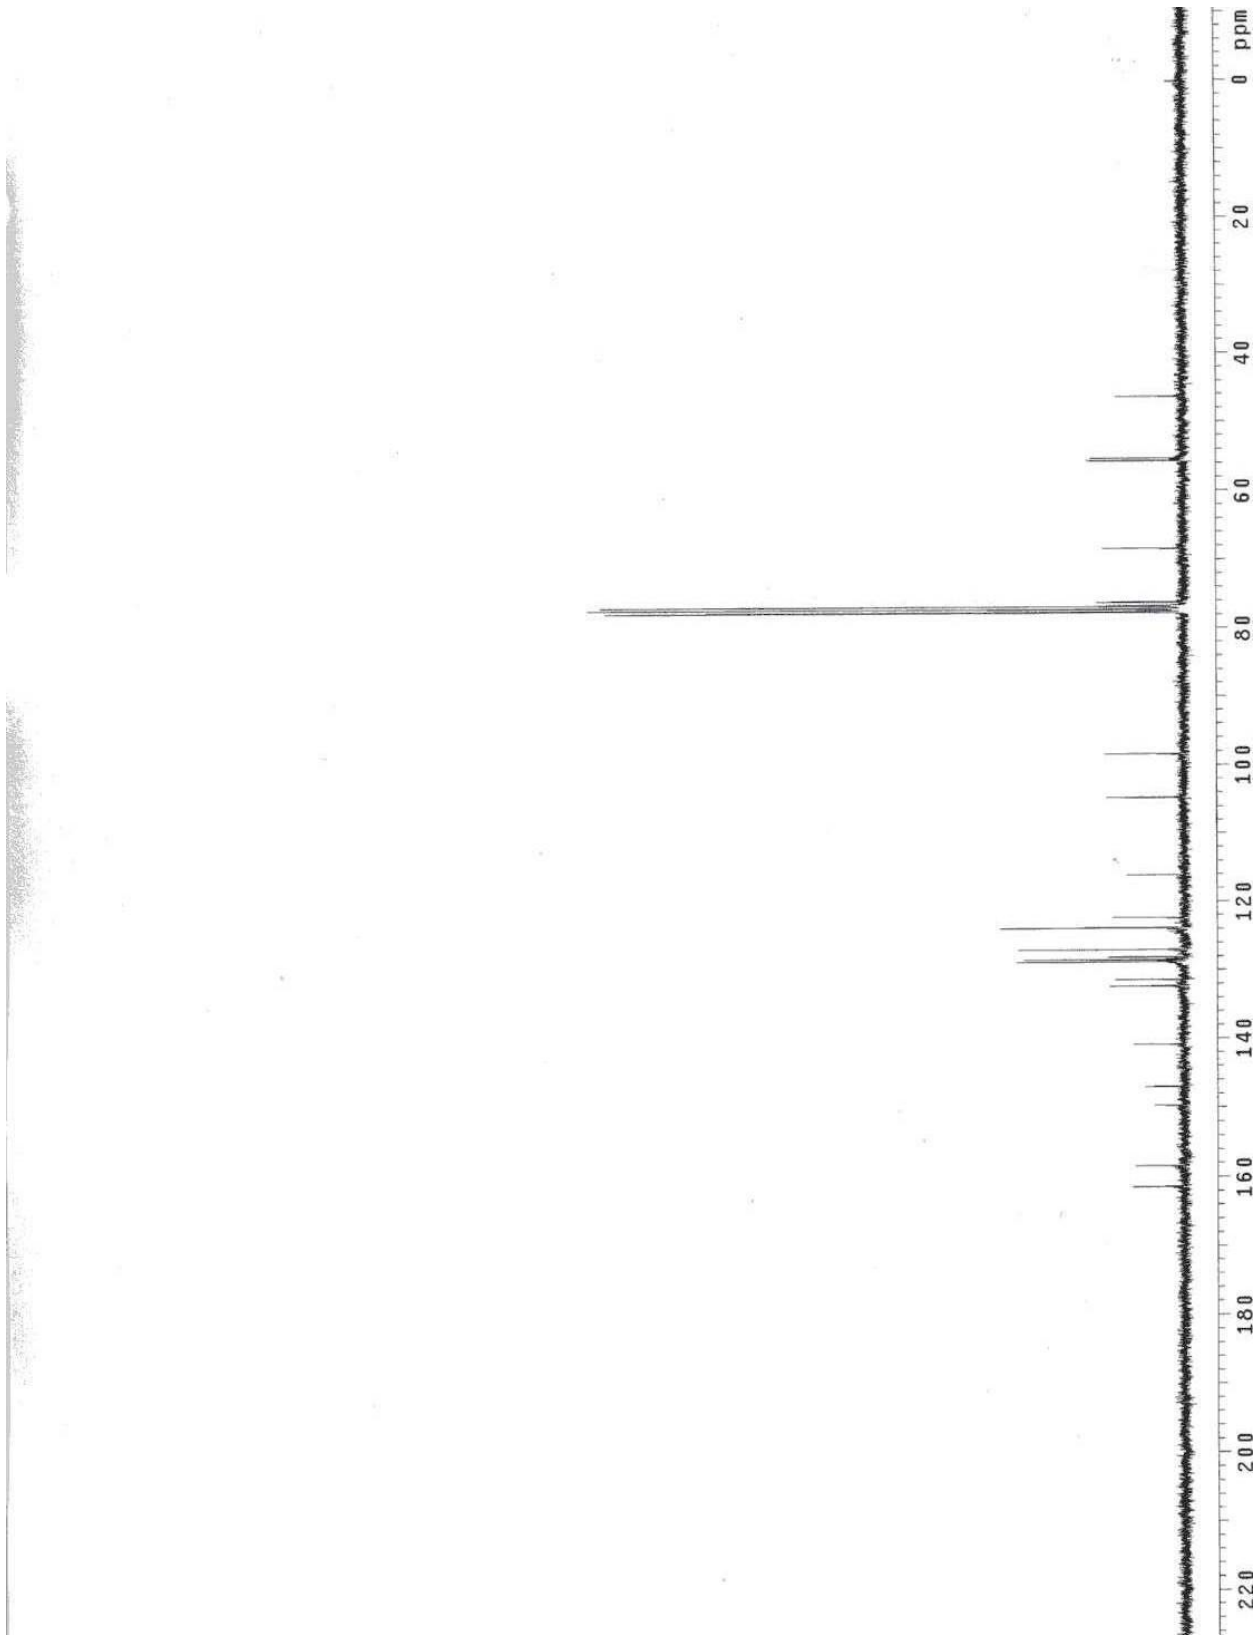

***N*-(1-(4-bromophenyl)-1-hydroxybut-3-en-2-yl)-*N*-(2,4-dimethoxybenzyl)-4-nitrobenzenesulfonamide (3c)**

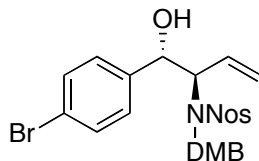

In accordance with the general procedure, the reaction was allowed to stir at 100 °C for 14 hours, at which point the reaction mixture was concentrated *in vacuo* and purified by flash column chromatography (SiO<sub>2</sub>: 25% EtOAc/cyclohexane) to furnish the title compound (89 mg) as a brown foam in 77% yield.

**<sup>1</sup>H NMR** (400 MHz, CDCl<sub>3</sub>): δ 8.19 (d, *J* = 8.8 Hz, 2H), 7.75 (d, *J* = 8.8 Hz, 2H), 7.36 (d, *J* = 8.4 Hz, 2H), 7.08 (m, 3H), 6.39 (d, *J* = 8.4 Hz, 1H), 6.26 (d, *J* = 2.3 Hz, 1H), 6.05 (ddd, *J* = 17.2, 10.2, 7.0 Hz, 1H), 5.21 (d, *J* = 10.2 Hz, 1H), 5.04 (dd, *J* = 5.1, 2.6 Hz, 1H), 4.98 (d, *J* = 17.2 Hz, 1H), 4.22 (m, 3H), 3.78 (s, 3H), 3.63 (s, 3H), 2.62 (d, *J* = 2.6 Hz, 1H).

**<sup>13</sup>C NMR** (100 MHz, CDCl<sub>3</sub>): δ 161.2, 158.1, 149.6, 146.5, 139.6, 132.1, 131.2, 130.6, 128.5, 128.4, 123.7, 122.5, 121.6, 115.5, 104.6, 98.2, 75.4, 68.2, 55.4, 55.1, 46.1.

**HRMS** (EI): Calcd. for C<sub>25</sub>H<sub>25</sub>N<sub>2</sub>O<sub>7</sub>SBrNa (M+23): 599.0468 Found: 599.0458

**FTIR** (neat): 3509, 2938, 2359, 1733, 1611, 1588, 1464, 1348, 1209, 1158, 1010 cm<sup>-1</sup>.

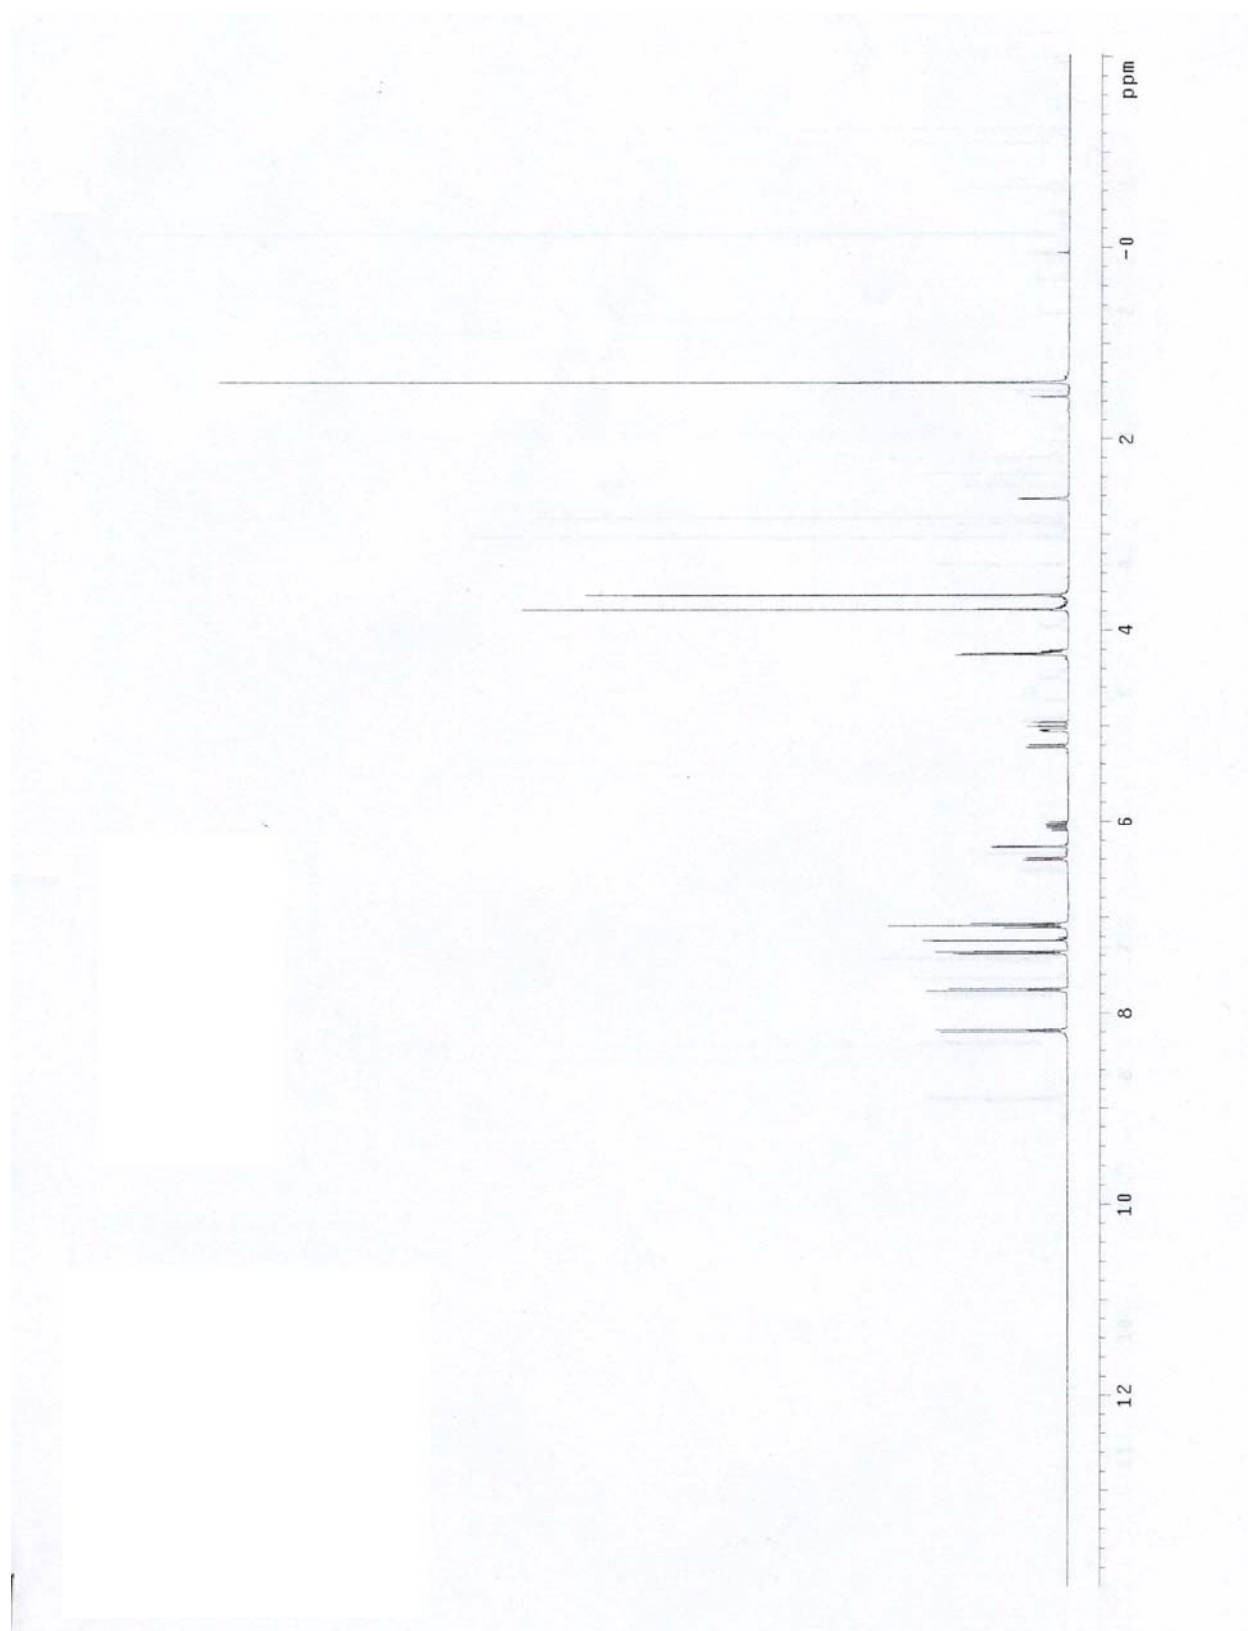



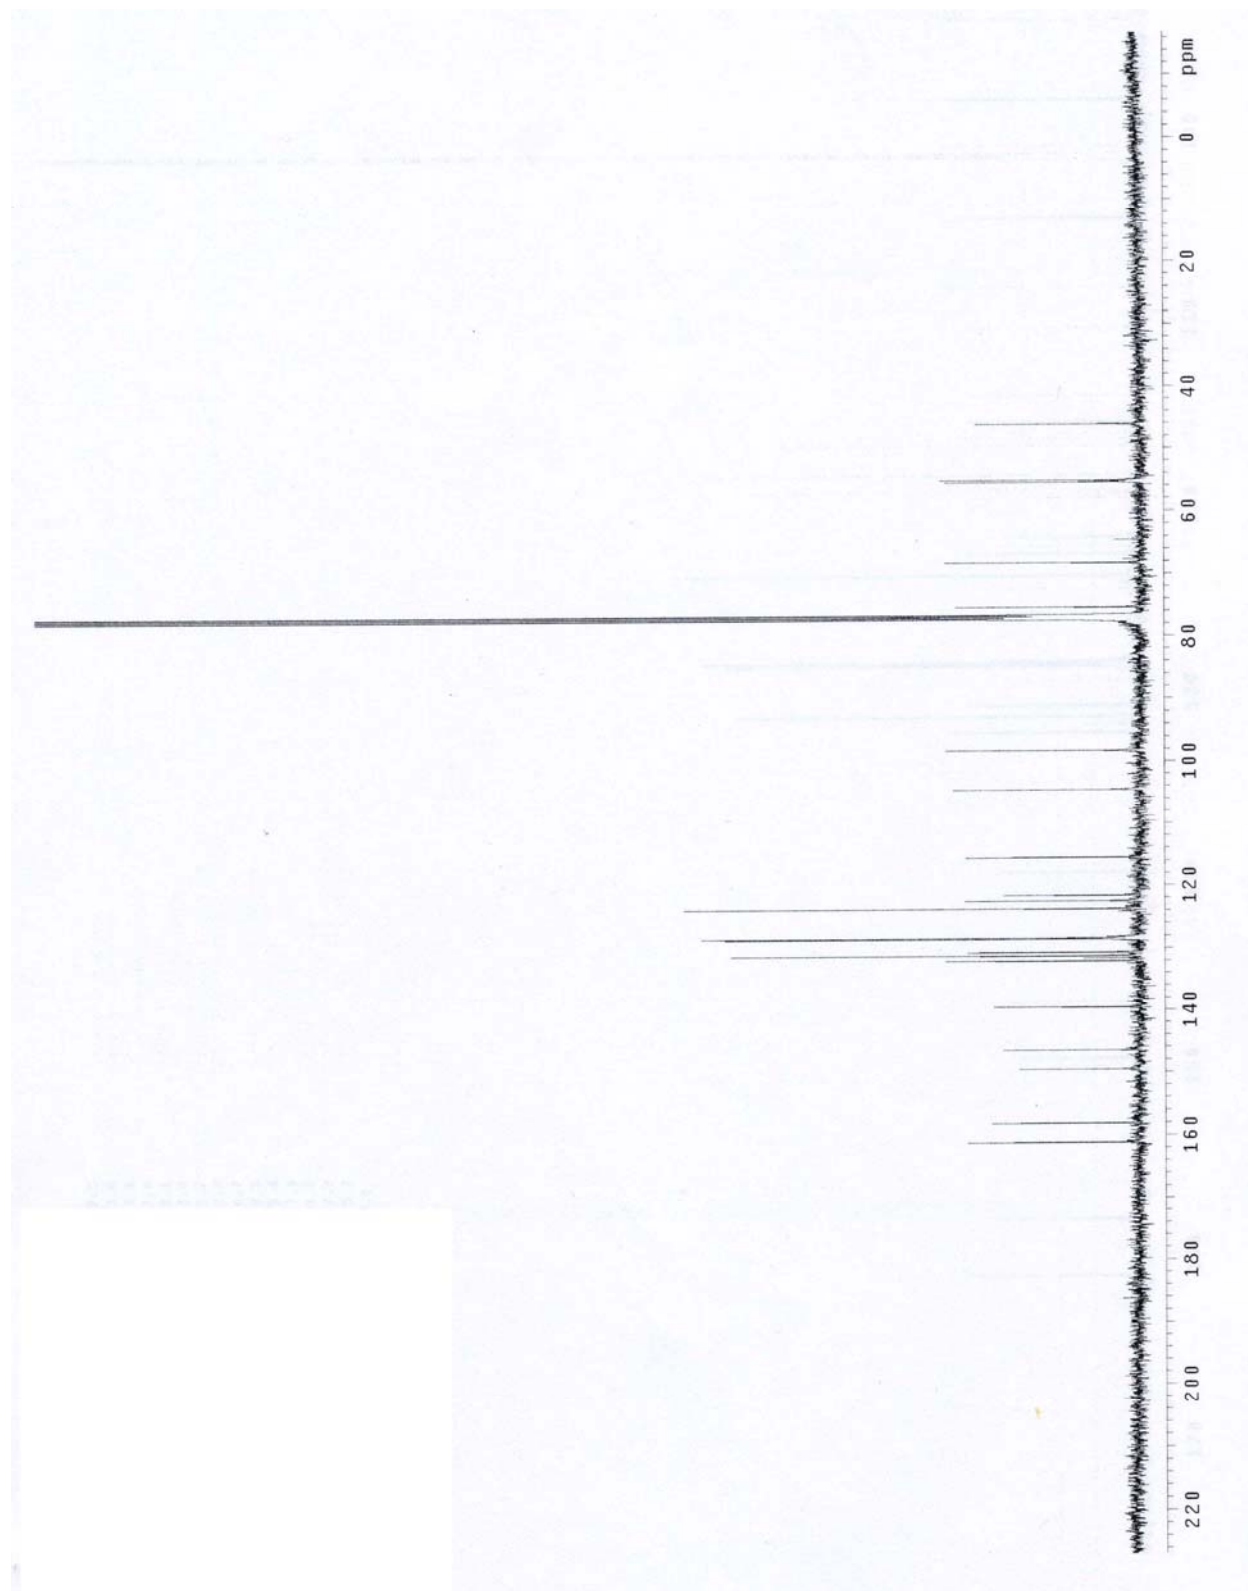

**Methyl 4-(2-(*N*-(2,4-dimethoxybenzyl)-4-nitrophenylsulfonamido)-1-hydroxybut-3-enyl)benzoate (3d)**

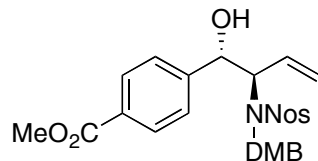

In accordance with the general procedure, the reaction was allowed to stir at 100 °C for 14 hours, at which point the reaction mixture was concentrated *in vacuo* and purified by flash column chromatography (SiO<sub>2</sub>: 30% EtOAc/cyclohexane) to furnish the title compound (105 mg) as a yellow oil in 94% yield.

**<sup>1</sup>H NMR** (400 MHz, CDCl<sub>3</sub>): δ 8.12 (d, *J* = 9.0 Hz, 2H), 7.86 (d, *J* = 8.4 Hz, 2H), 7.70 (d, *J* = 9.0 Hz, 2H), 7.26 (d, *J* = 8.4 Hz, 2H), 7.08 (d, *J* = 8.4 Hz, 1H), 6.34 (dd, *J* = 8.4, 2.3 Hz, 1H), 6.21 (d, *J* = 2.3 Hz, 1H), 5.99 (ddd, *J* = 17.2, 10.4, 6.8 Hz, 1H), 5.13 (d, *J* = 10.4 Hz, 1H), 5.08 (d, *J* = 4.7 Hz, 1H), 4.87 (d, *J* = 17.2 Hz, 1H), 4.26 (dd, *J* = 6.8, 4.7 Hz, 1H), 4.23 (s, 1H), 4.22 (s, 1H), 3.84 (s, 3H), 3.72 (s, 3H), 3.58 (s, 3H).

**<sup>13</sup>C NMR** (100 MHz, CDCl<sub>3</sub>): δ 166.8, 161.2, 158.1, 149.5, 146.5, 145.7, 132.0, 130.4, 129.5, 129.4, 128.5, 126.6, 123.7, 122.5, 115.6, 104.6, 98.2, 75.8, 68.3, 55.4, 55.2, 52.1, 46.1.

**HRMS** (EI): Calcd. for C<sub>27</sub>H<sub>27</sub>N<sub>2</sub>O<sub>9</sub>S (M-1): 555.1434, Found: 555.1443.

**FTIR** (neat): 3502, 2952, 2360, 1720, 1588, 1437, 1348, 1209, 1108 cm<sup>-1</sup>.

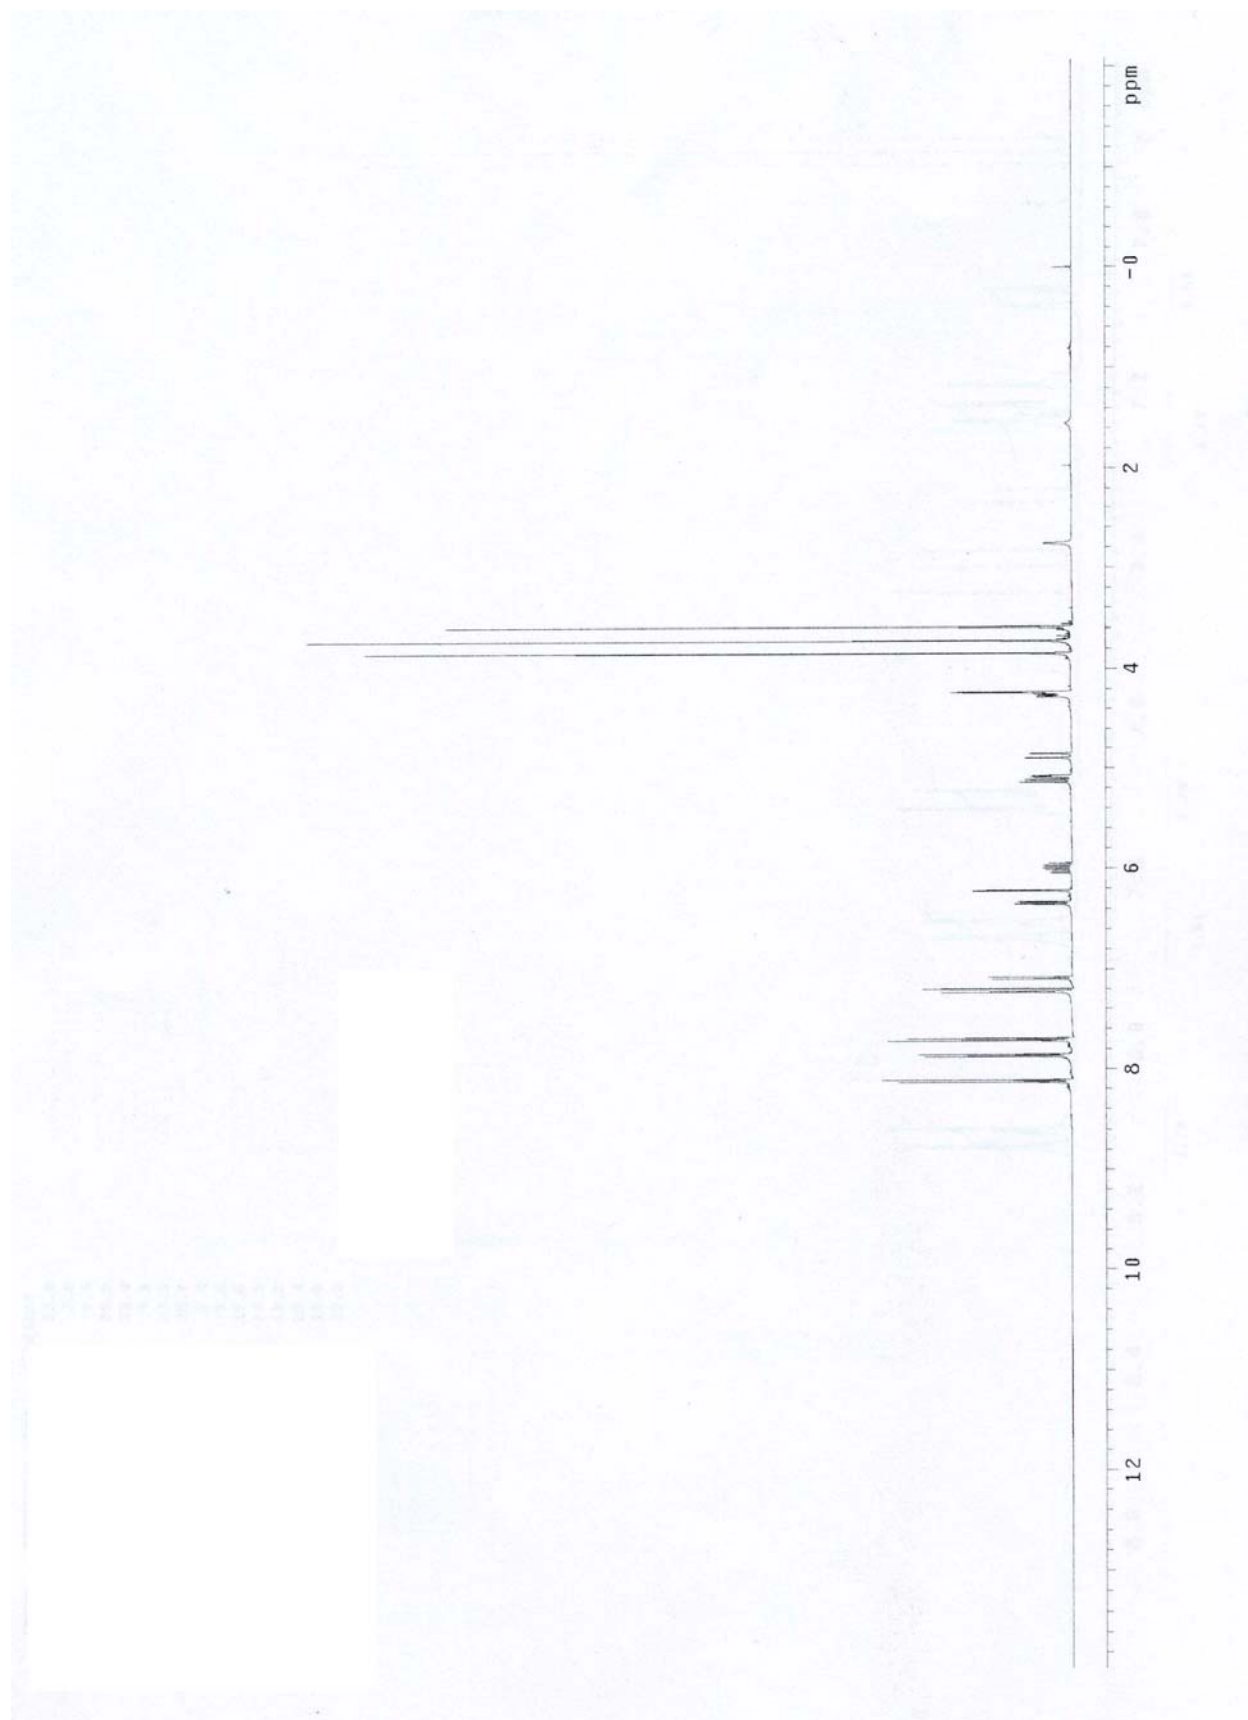

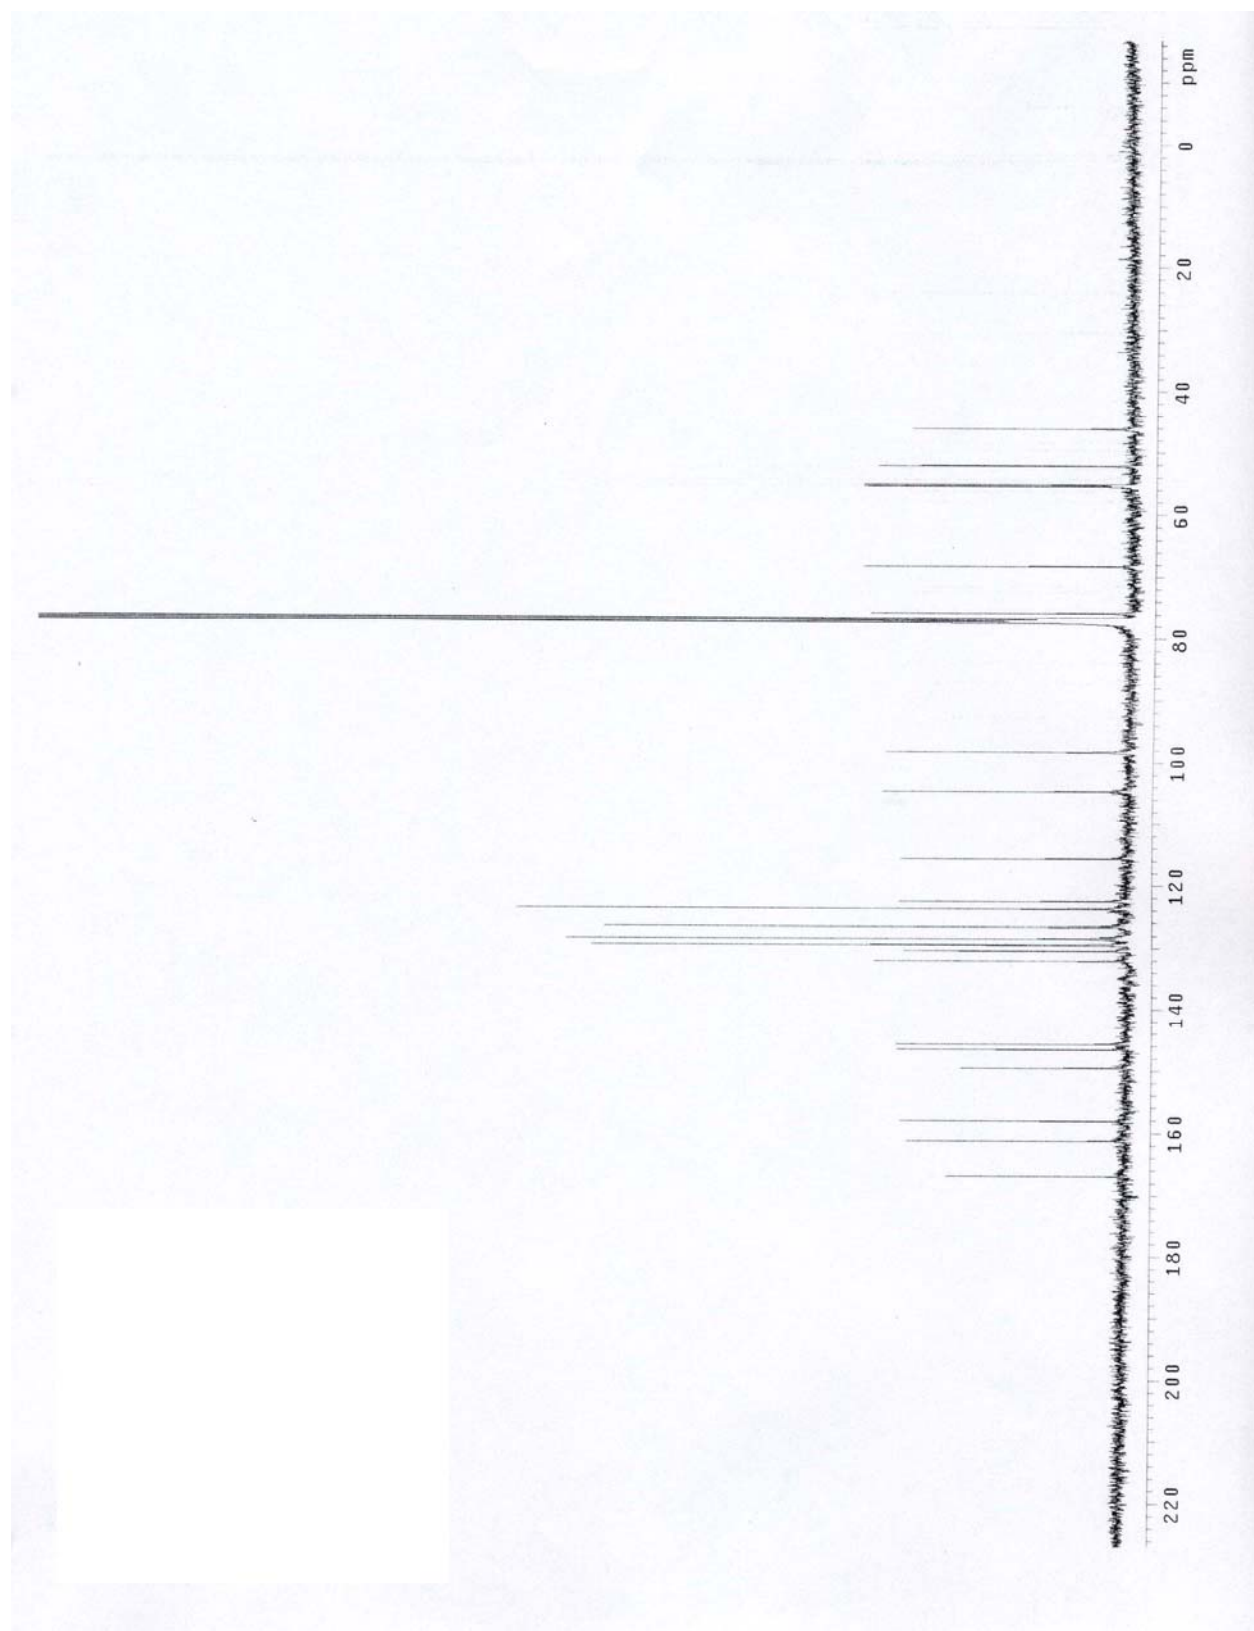

***N*-(1-(4-acetylphenyl)-1-hydroxybut-3-en-2-yl)-*N*-(2,4-dimethoxybenzyl)-4-nitrobenzenesulfonamide (3e)**

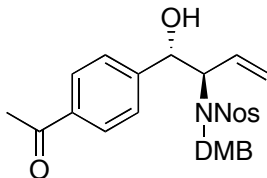

In accordance with the general procedure, the reaction was allowed to stir at 100 °C for 14 hours, at which point the reaction mixture was concentrated *in vacuo* and purified by flash column chromatography (SiO<sub>2</sub>: 30% EtOAc/cyclohexane) to furnish the title compound (80 mg) as a yellow oil in 94% yield.

**<sup>1</sup>H NMR** (400 MHz, CDCl<sub>3</sub>): δ 8.18 (d, *J* = 8.6 Hz, 2H), 7.84 (d, *J* = 8.2 Hz, 2H), 7.77 (d, *J* = 8.6 Hz, 2H), 7.31 (d, *J* = 8.2 Hz, 2H), 7.13 (d, *J* = 8.4 Hz, 1H), 6.38 (d, *J* = 8.4 Hz, 1H), 6.26 (s, 1H), 6.05 (dd, *J* = 17.6, 10.2 Hz, 1H), 5.17 (d, *J* = 10.2 Hz, 1H), 5.14 (d, *J* = 4.3 Hz, 1H), 4.91 (d, *J* = 17.6 Hz, 1H), 4.28 (m, 3H), 3.78 (s, 3H), 3.64 (s, 3H), 2.85 (s, 1H), 2.57 (s, 3H).

**<sup>13</sup>C NMR** (100 MHz, CDCl<sub>3</sub>): δ 197.8, 161.2, 158.1, 149.5, 146.5, 145.8, 136.5, 132.0, 130.2, 128.5, 128.2, 126.7, 123.7, 122.6, 115.6, 104.7, 98.2, 75.9, 68.3, 55.4, 55.2, 46.2, 26.2.

**HRMS** (EI): Calcd. for C<sub>27</sub>H<sub>27</sub>N<sub>2</sub>O<sub>8</sub>S (M-1): 539.1487, Found: 539.1439

**FTIR** (neat): 3485, 3105, 2935, 2361, 1678, 1508, 1455, 1348, 1269, 1160 cm<sup>-1</sup>.

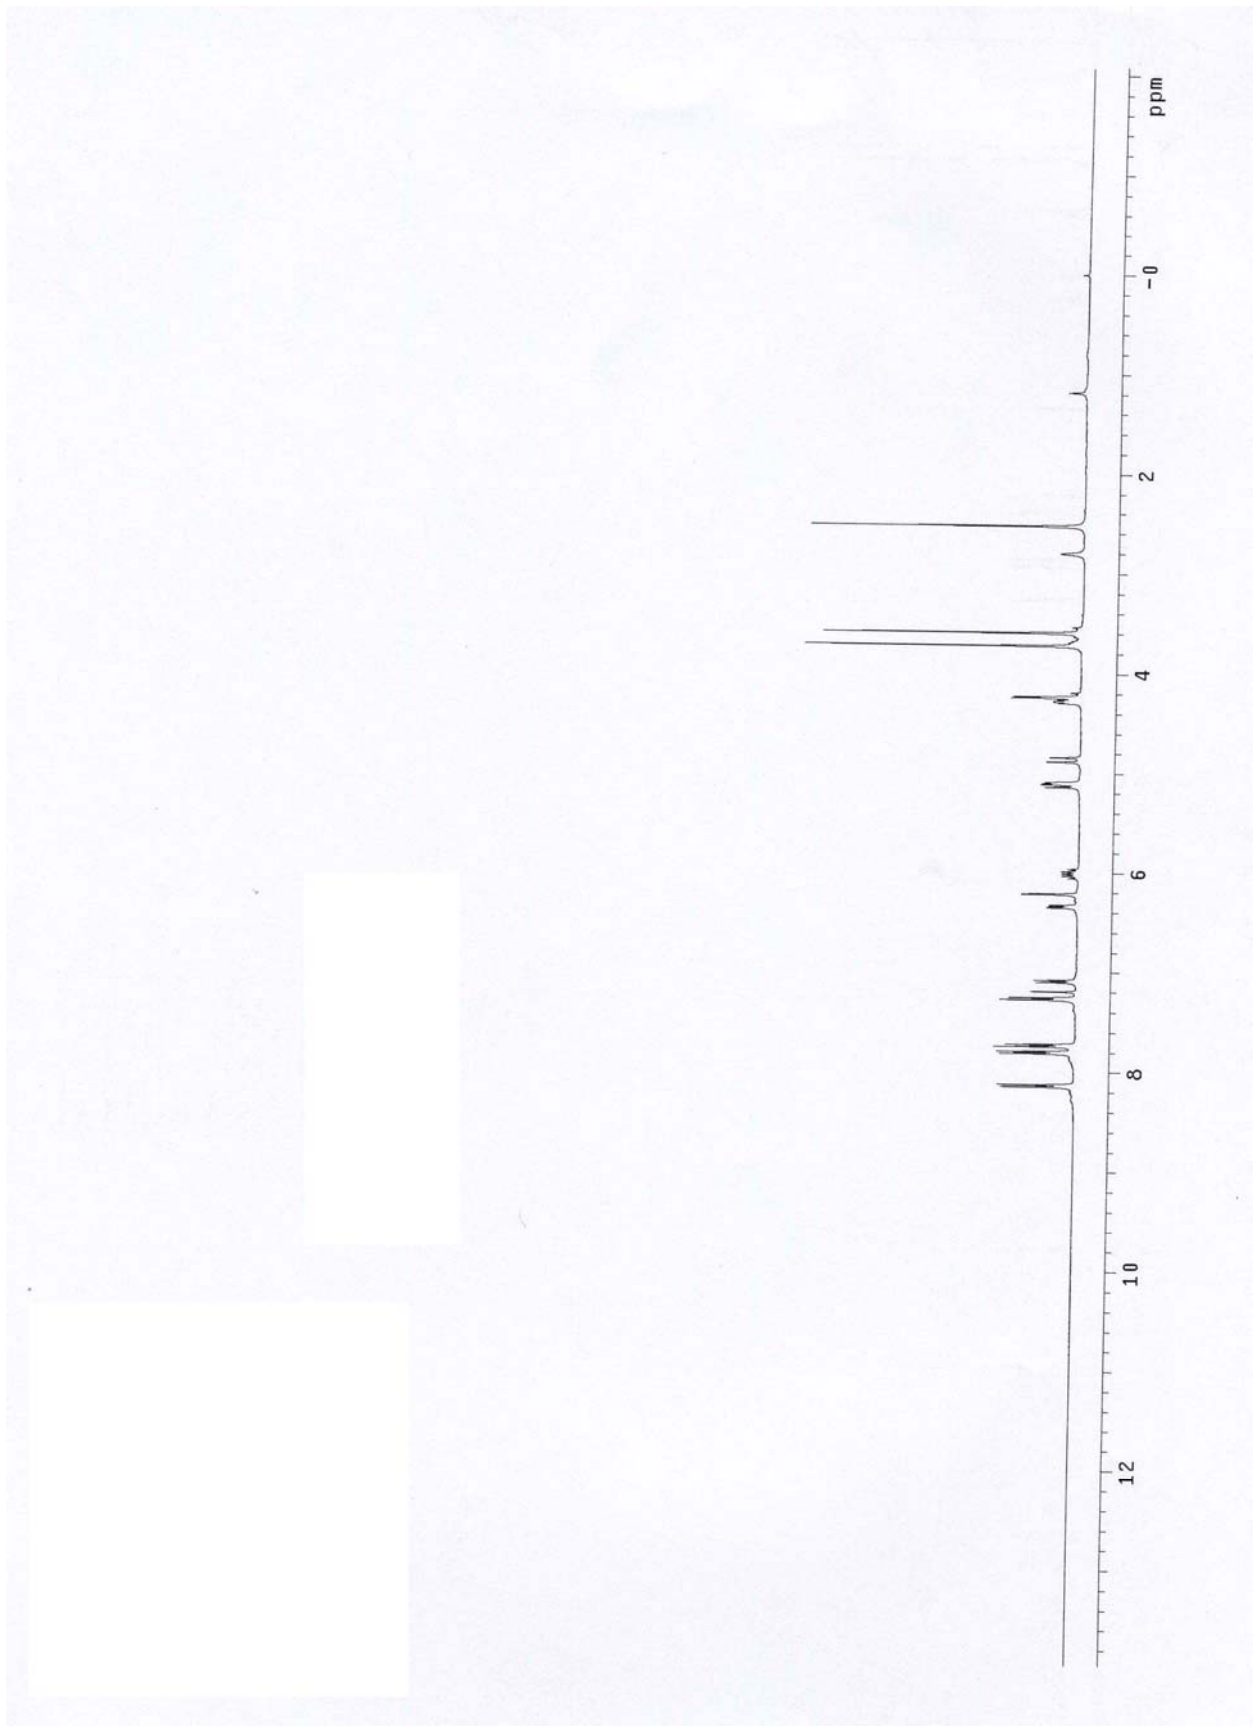

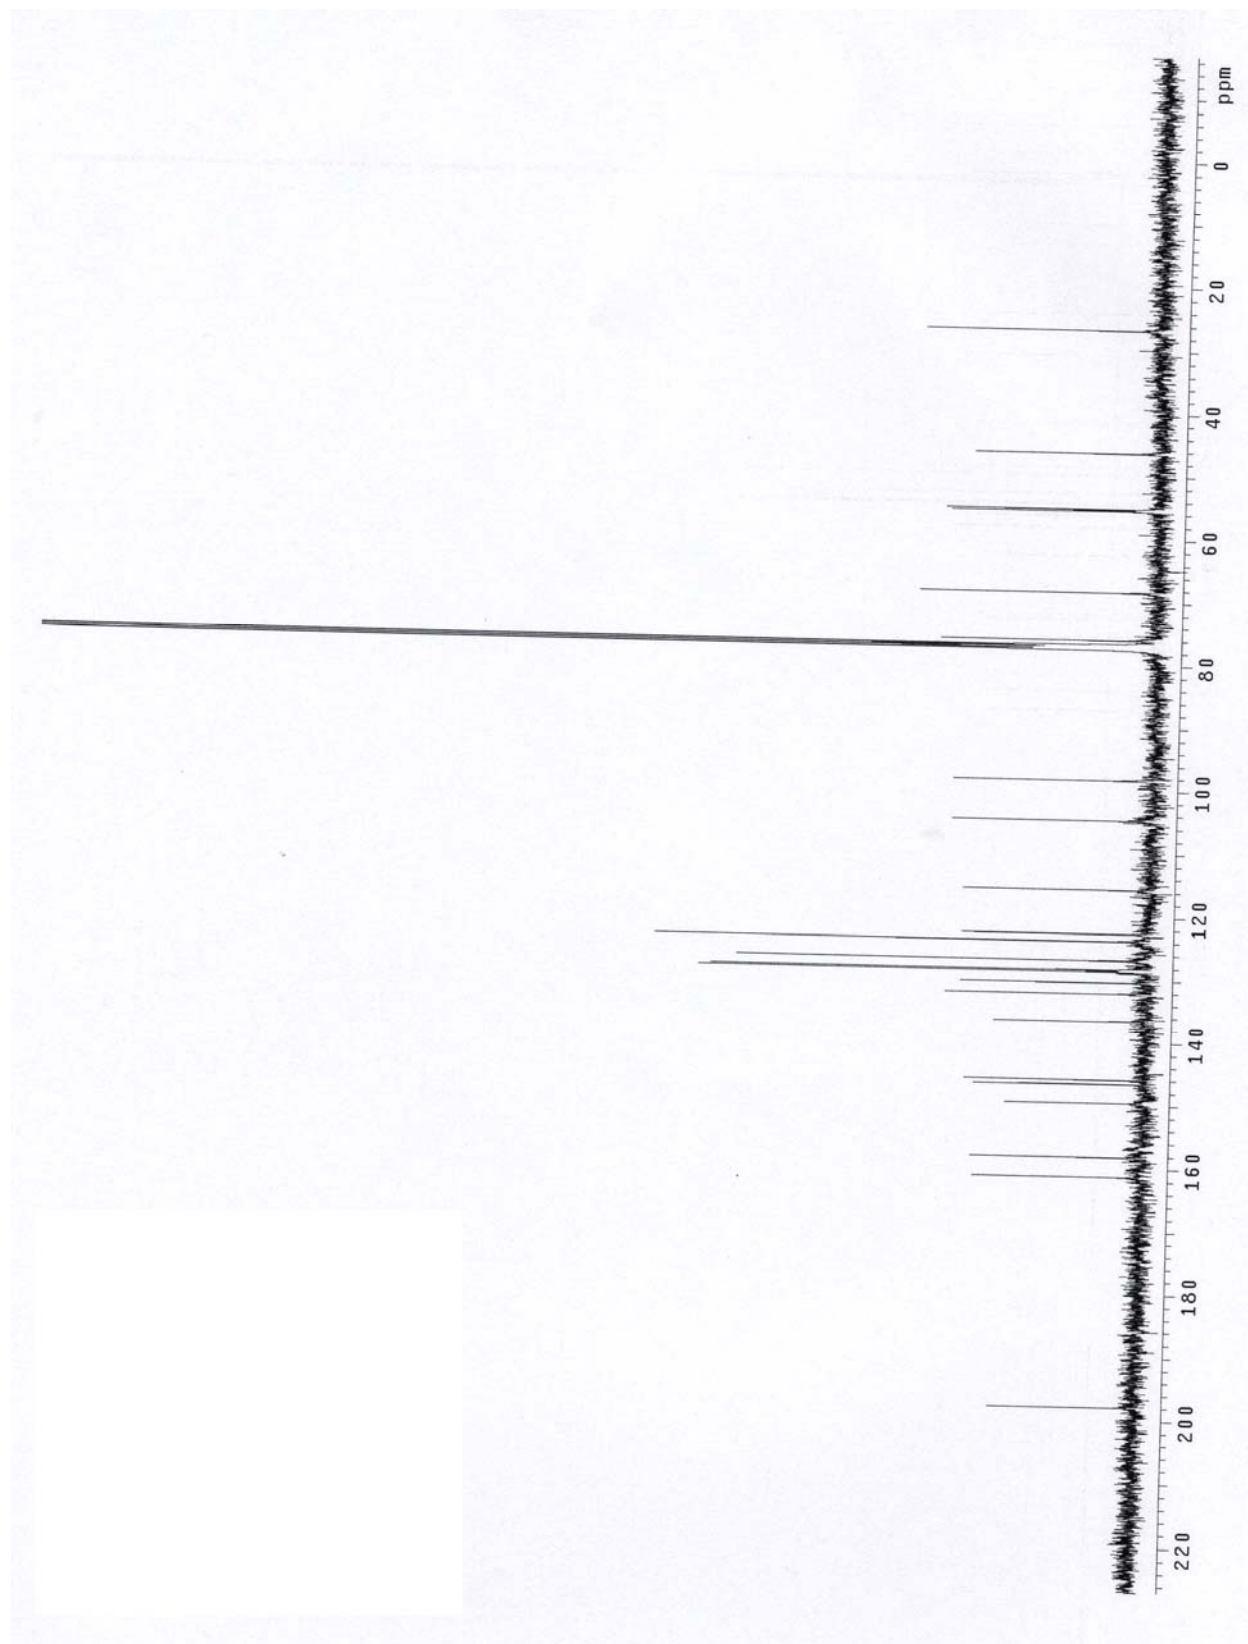

***N*-(1-(5-bromofuran-2-yl)-1-hydroxybut-3-en-2-yl)-*N*-(2,4-dimethoxybenzyl)-4-nitrobenzenesulfonamide (3f)**

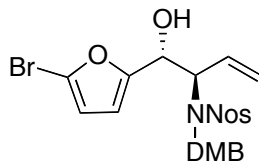

In accordance with the general procedure, the reaction was allowed to stir at 100 °C for 14 hours, at which point the reaction mixture was concentrated *in vacuo* and purified by flash column chromatography (SiO<sub>2</sub>: 35% EtOAc/cyclohexane) to furnish the title compound (102 mg) as a orange oil in 74% yield.

**<sup>1</sup>H NMR** (400 MHz, CDCl<sub>3</sub>): δ 8.21 (d, *J* = 9.2 Hz, 2H), 7.80 (d, *J* = 9.2 Hz, 2H), 7.12 (d, *J* = 8.4, 2.4 Hz, 1H), 6.27 (d, *J* = 2.4 Hz, 1H), 6.25 – 6.22 (m, 2H), 6.05 (ddd, *J* = 17.2, 10.4, 6.8 Hz, 1H), 5.31 (d, *J* = 10.4 Hz, 1H), 5.20 (d, *J* = 17.2 Hz, 1H), 4.96 (dd, *J* = 7.2, 4.4 Hz, 1H), 4.54 (t, *J* = 7.2 Hz, 1H), 4.30 (s, 1H), 4.29 (s, 1H), 3.78 (s, 3H), 3.65 (s, 3H), 2.57 (d, *J* = 4.4 Hz, 1H).

**<sup>13</sup>C NMR** (100 MHz, CDCl<sub>3</sub>): δ 161.4, 158.3, 155.3, 149.8, 146.8, 132.5, 131.8, 128.8, 123.9, 122.6, 121.6, 115.7, 112.4, 111.2, 104.7, 98.4, 69.3, 65.5, 55.6, 55.4, 45.9.

**HRMS** (EI): Calcd. for C<sub>23</sub>H<sub>23</sub>N<sub>2</sub>O<sub>8</sub>SBrNa (M+23): 589.0249, Found: 589.0250.

**FTIR** (neat): 3503, 2939, 2361, 1611, 1588, 1464, 1293, 1158, 1034 cm<sup>-1</sup>.



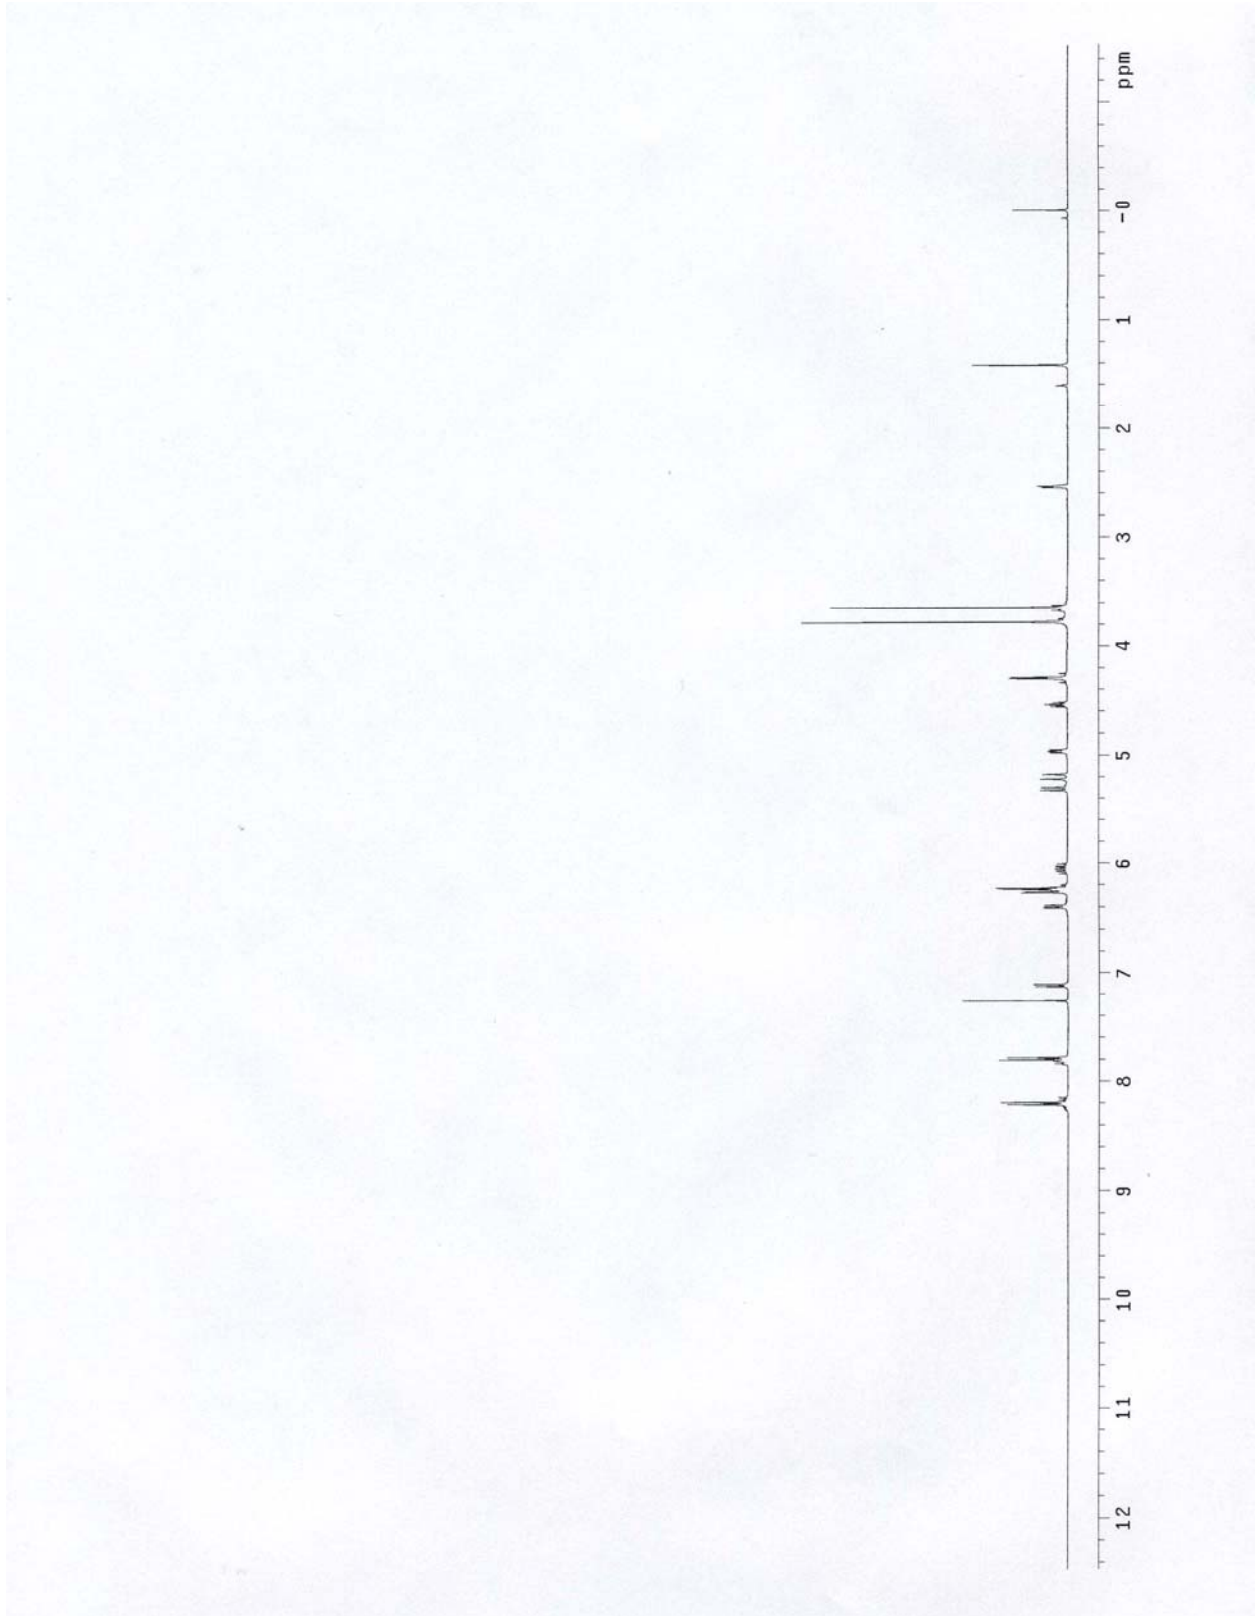

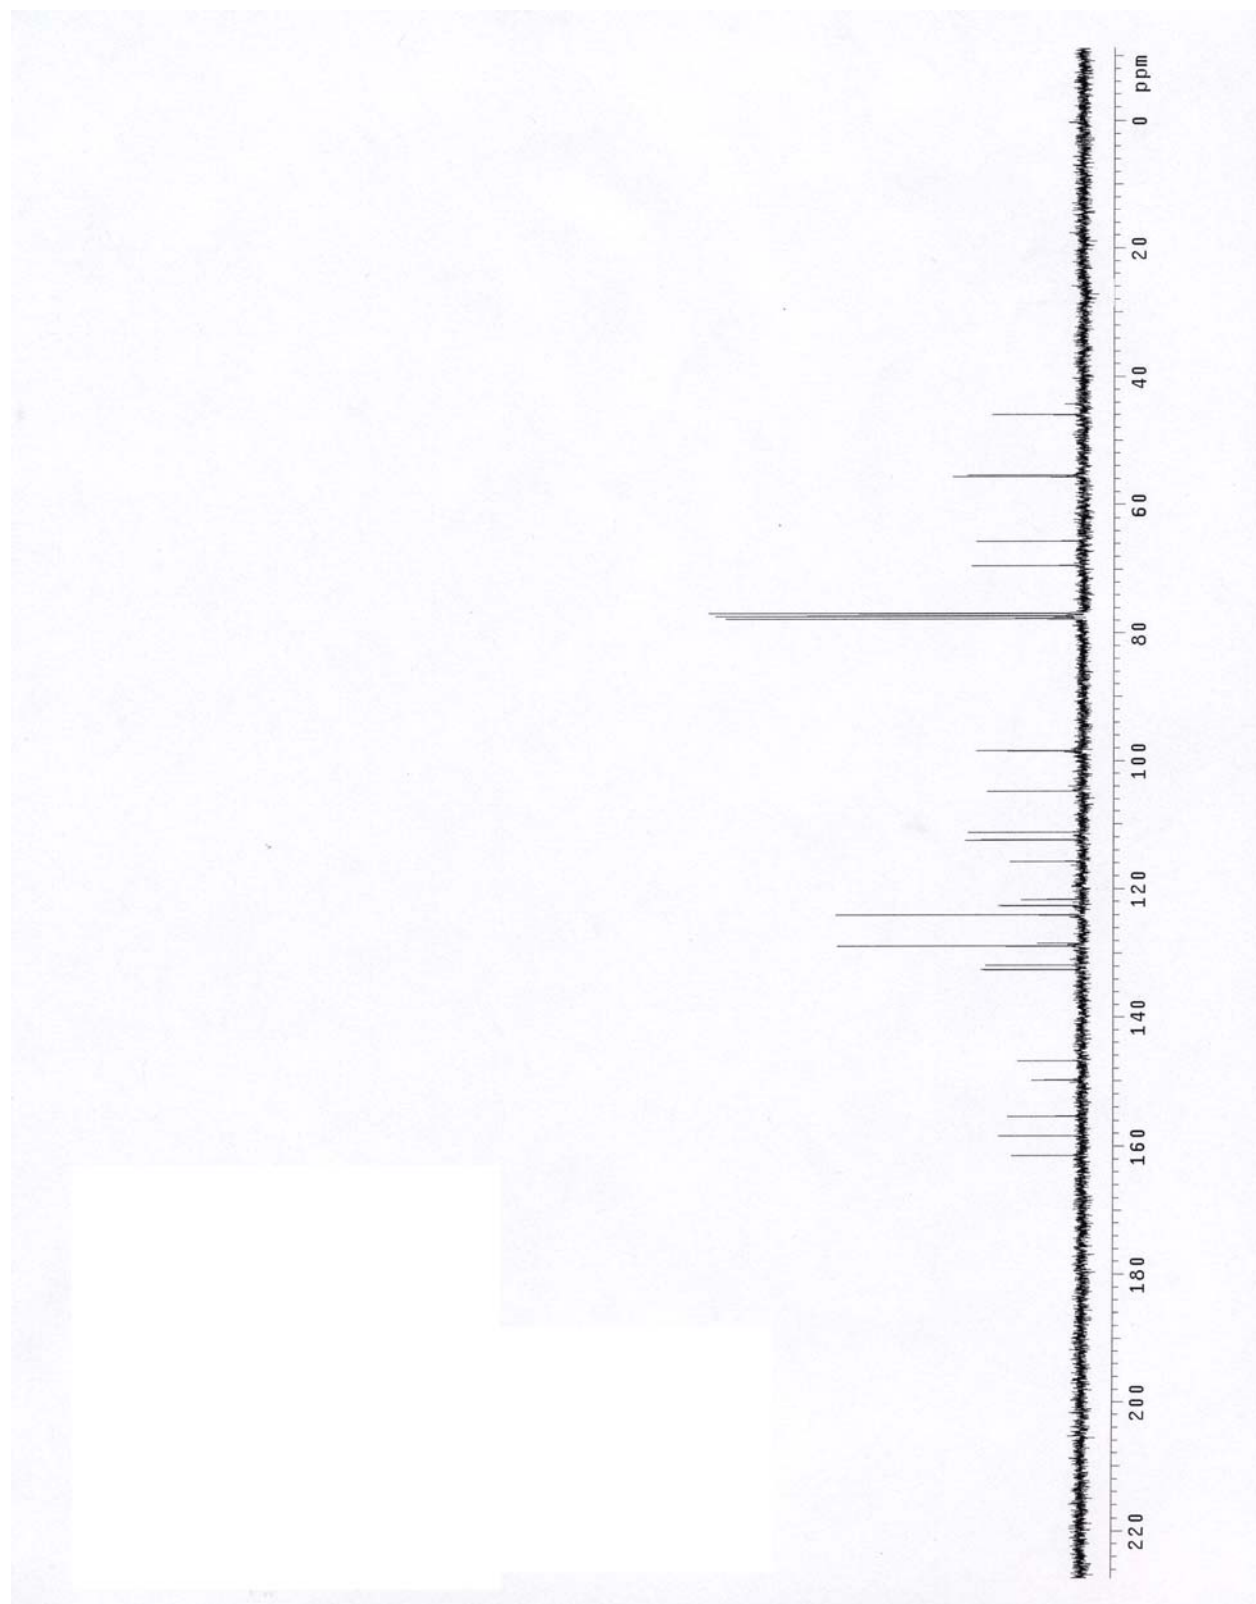

**(E)-N-(2,4-dimethoxybenzyl)-N-(4-hydroxy-6-phenylhexa-1,5-dien-3-yl)-4-nitrobenzenesulfonamide (3g)**

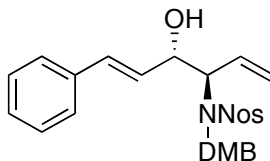

In a modification of the general procedure employing 200 mol% of allene **1e** (0.4 mmol), the reaction was allowed to stir at 100 °C for 18 hours, at which point the reaction mixture was concentrated *in vacuo* and purified by flash column chromatography (SiO<sub>2</sub>: 0-25% EtOAc/cyclohexane) to furnish the title compound (64 mg) as a yellow oil in 61% yield.

**<sup>1</sup>H NMR** (400 MHz, CDCl<sub>3</sub>): δ 8.16 (d, *J* = 8.4 Hz, 2H), 7.84 (d, *J* = 8.4 Hz, 2H), 7.25 – 7.35 (m, 6H), 6.40 (m, 2H), 6.26 (d, *J* = 2.0 Hz, 1H), 6.02 (m, 2H), 5.31 (d, *J* = 10.4 Hz, 1H), 5.20 (d, *J* = 17.2 Hz, 1H), 4.48 (m, 1H), 4.42 (s, 2H), 4.34 (t, *J* = 7.2 Hz, 1H), 3.77 (d, *J* = .8 Hz, 3H), 3.66 (s, 3H), 2.18 (d, *J* = 3.2 Hz, 1H)

**<sup>13</sup>C NMR** (100 MHz, CDCl<sub>3</sub>): δ 161.1, 158.1, 149.5, 146.7, 136.4, 132.7, 132.4, 132.0, 128.6, 128.5, 128.3, 128.0, 126.6, 123.7, 121.9, 116.0, 104.5, 98.1, 73.7, 66.4, 55.4, 55.1, 44.9.

**HRMS** (EI): Calcd. for C<sub>27</sub>H<sub>29</sub>N<sub>2</sub>O<sub>7</sub>S (M+1): 525.1688, Found: 525.1690

**FTIR** (neat): 3530, 2937, 2361, 1611, 1588, 1529, 1509, 1456, 1349, 1295, 1209, 1160, 1132, 1107, 1090, 1036, 735, 686 cm<sup>-1</sup>.

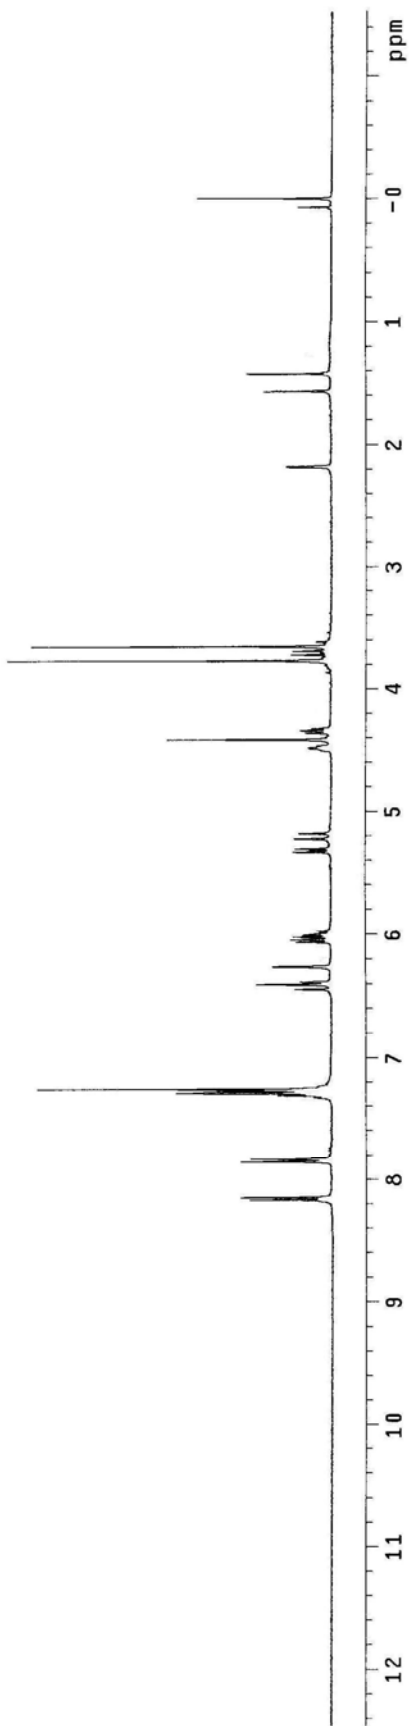

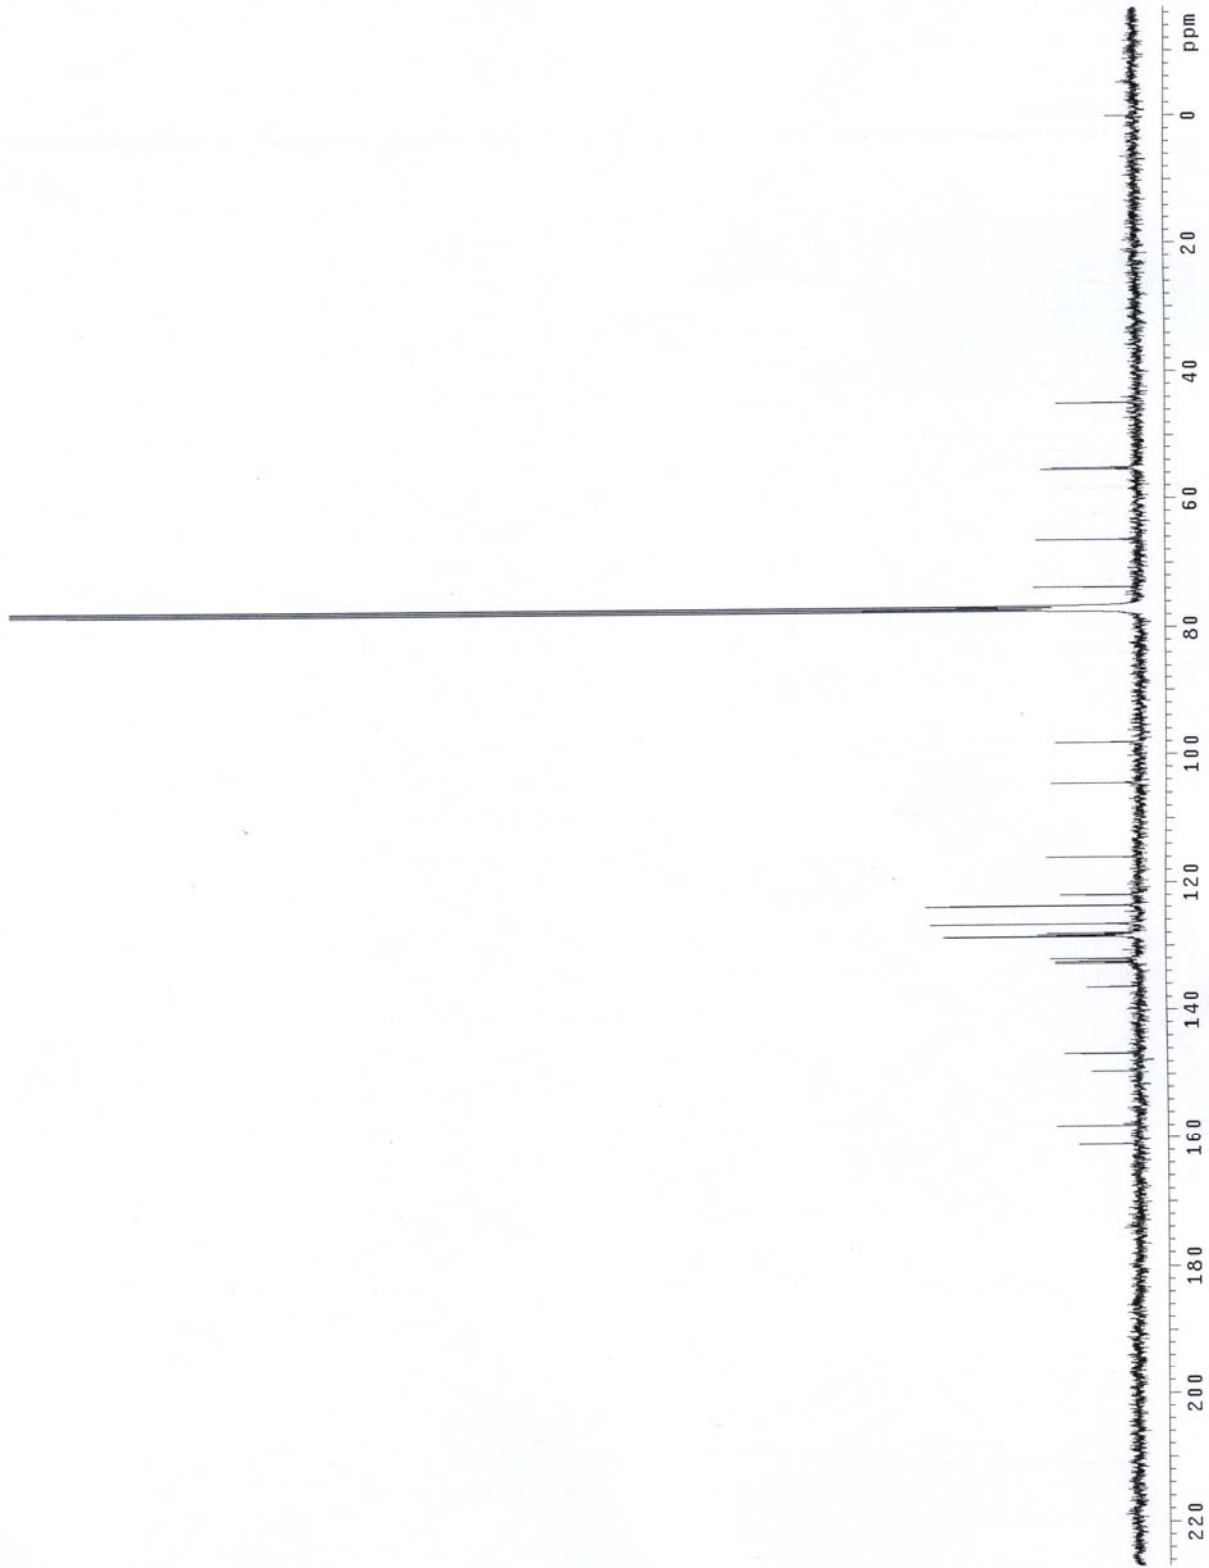

**(E)-N-(7-(benzyloxy)-4-hydroxyhepta-1,5-dien-3-yl)-N-(2,4-dimethoxybenzyl)-4-nitrobenzenesulfonamide (3h)**

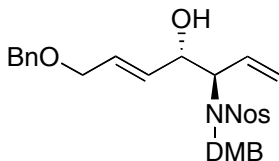

In a modification of the general procedure employing 200 mol% of allene **1e** (0.4 mmol), the reaction was allowed to stir at 100 °C for 18 hours, at which point the reaction mixture was concentrated *in vacuo* and purified by flash column chromatography (SiO<sub>2</sub>: 0-30% EtOAc/cyclohexane) to furnish the title compound (70 mg) as a yellow oil in 65% yield.

**<sup>1</sup>H NMR** (400 MHz, CDCl<sub>3</sub>): δ 8.18 (d, *J* = 8.8 Hz, 2H), 7.80 (d, *J* = 8.8 Hz, 2H), 7.33 – 7.35 (m, 3H), 7.27 – 7.32 (m, 3H), 6.40 (dd, *J* = 8.4, 2.4 Hz, 1H), 6.21 (d, *J* = 2.4 Hz, 1H), 5.99 (ddd, *J* = 17.2, 10.4, 6.8 Hz, 1H), 5.71 (m, 2H), 5.28 (d, *J* = 10.4 Hz, 1H), 5.14 (d, *J* = 17.2 Hz, 1H), 4.52 (s, 2H), 4.39 (s, 2H), 4.37 (m, 1H), 4.30 (m, 1H), 3.99 (d, *J* = 5.2 Hz, 2H), 3.75 (s, 3H), 3.64 (s, 3H), 2.20 (d, *J* = 3.6 Hz, 1H).

**<sup>13</sup>C NMR** (100 MHz, CDCl<sub>3</sub>): δ 162.3, 158.3, 149.7, 147.0, 138.5, 132.5, 131.9, 131.7, 130.2, 128.7, 128.6, 128.0, 127.9, 123.9, 122.1, 116.1, 104.7, 98.2, 73.6, 72.5, 70.1, 66.4, 55.6, 55.3, 45.4.

**HRMS** (CI): Calcd. for C<sub>29</sub>H<sub>32</sub>N<sub>2</sub>O<sub>8</sub>S (M+1): 568.1879, Found: 568.1874

**FTIR** (neat): 3530, 2936, 2361, 1611, 1529, 1509, 1349, 1295, 1209, 1160, 1107, 1090, 1036, 736 cm<sup>-1</sup>.

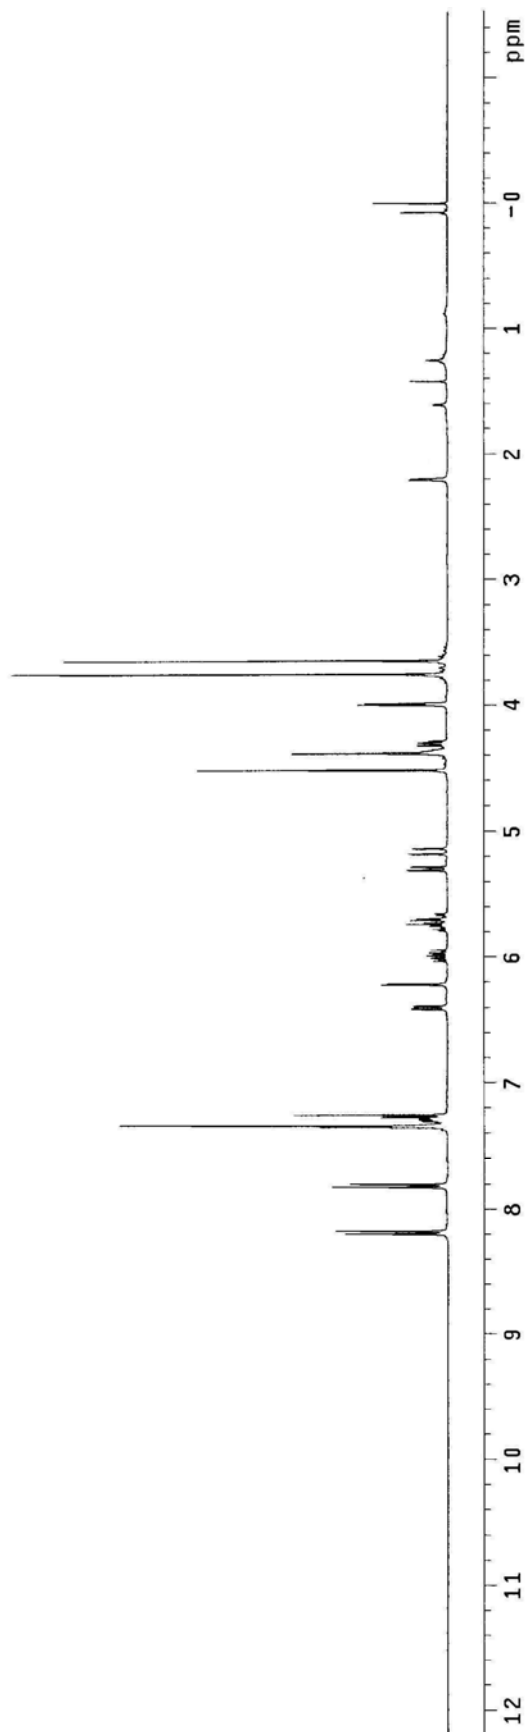

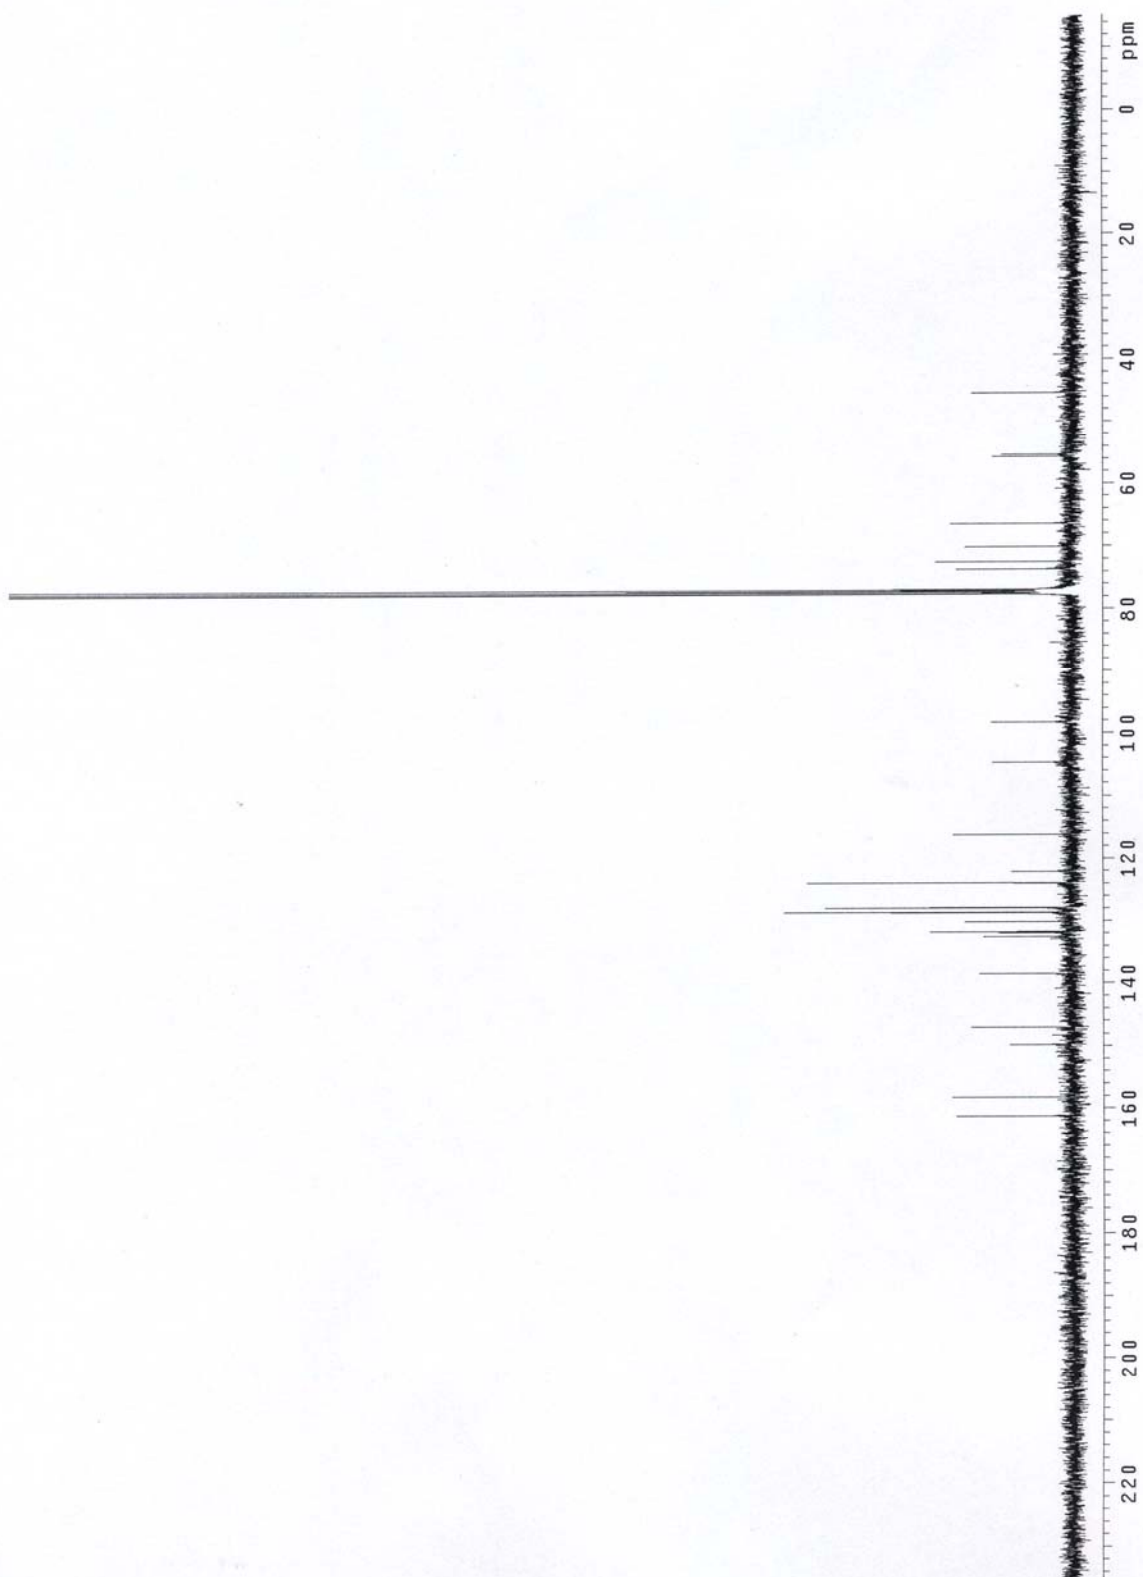



**(E)-N-(2,4-dimethoxybenzyl)-N-(4-hydroxyhepta-1,5-dien-3-yl)-4-nitrobenzenesulfonamide (3i)**

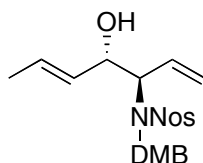

In a modification of the general procedure employing 200 mol% of allene **1e** (0.4 mmol), the reaction was allowed to stir at 100 °C for 18 hours, at which point the reaction mixture was concentrated *in vacuo* and purified by flash column chromatography (SiO<sub>2</sub>: 20% EtOAc/cyclohexane) to furnish the title compound (54 mg) as a yellow oil in 63% yield.

**<sup>1</sup>H NMR** (400 MHz, CDCl<sub>3</sub>): δ 8.20 (d, *J* = 8.8 Hz, 2H), 7.80 (d, *J* = 8.8 Hz, 2H), 7.27 (d, *J* = 8.4 Hz, 1H), 6.42 (dd, *J* = 8.4, 2.4 Hz, 1H), 6.23 (d, *J* = 2.4 Hz, 1H), 5.97 (ddd, *J* = 17.2, 10.4, 6.8 Hz 1H), 5.62 (ddd, *J* = 13.2, 6.8, 1.2 Hz 1H), 5.36 (dd, *J* = 6.8, 1.2 Hz, 1H), 5.28 (dd, *J* = 10.4, 1.2 Hz, 1H), 5.16 (d, *J* = 17.2 Hz, 1H), 4.38 (d, *J* = 3.6 Hz, 2H), 4.27 (m, 2H), 3.77 (s, 3H), 3.67 (s, 3H), 2.04 (d, *J* = 2.8 Hz, 1H), 1.66 (dd, *J* = 6.8, 1.2 Hz, 3H).

**<sup>13</sup>C NMR** (100 MHz, CDCl<sub>3</sub>): δ 161.0, 158.0, 149.5, 147.0, 132.3, 132.0, 130.1, 129.7, 128.4, 123.6, 121.6, 116.1, 104.4, 97.9, 74.1, 66.4, 55.4, 55.1, 45.1, 17.9.

**HRMS** (EI): Calcd. for C<sub>22</sub>H<sub>26</sub>N<sub>2</sub>O<sub>7</sub>SNa (M+23): 485.1356, Found: 485.1353.

**FTIR** (neat): 3530, 3102, 2938, 2359, 1612, 1587, 1529, 1509, 1349, 1295, 1210, 1159, 1133, 1090, 1036, 855, 735, 686 cm<sup>-1</sup>.

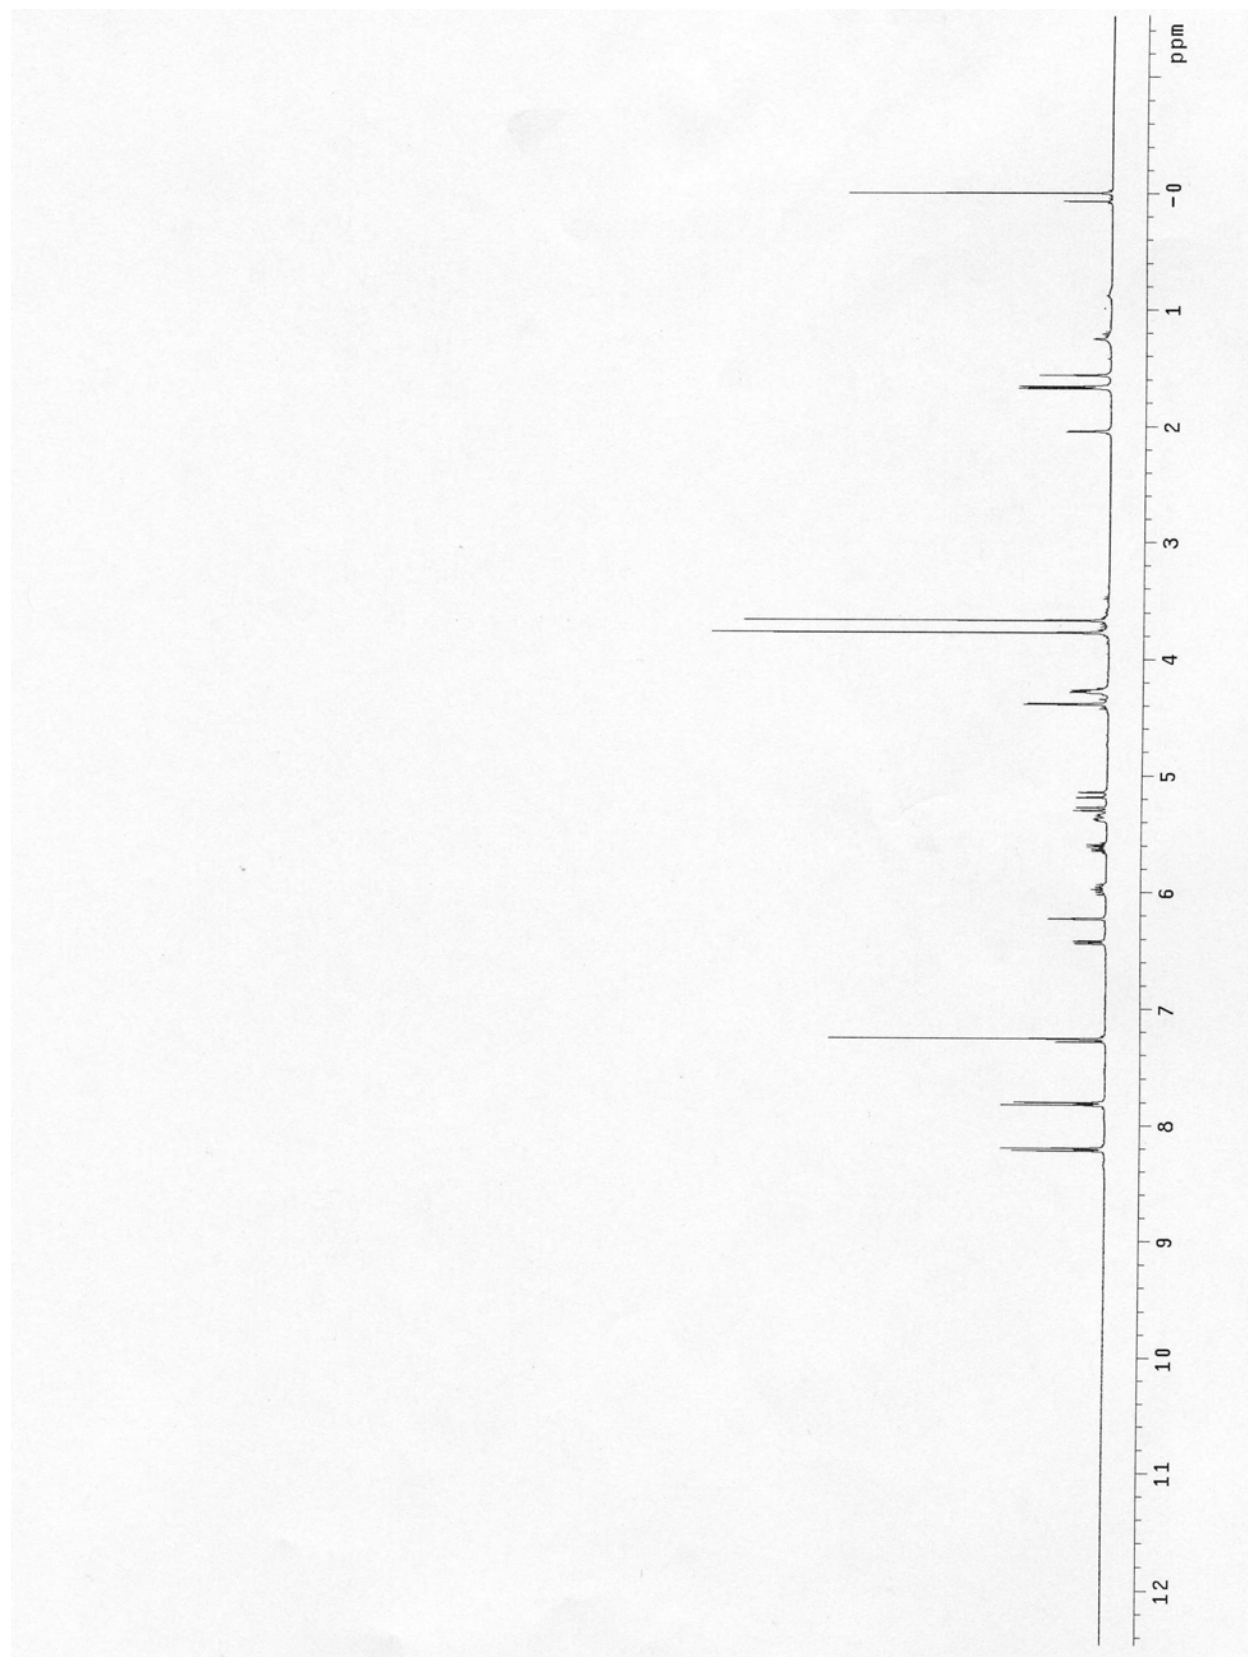

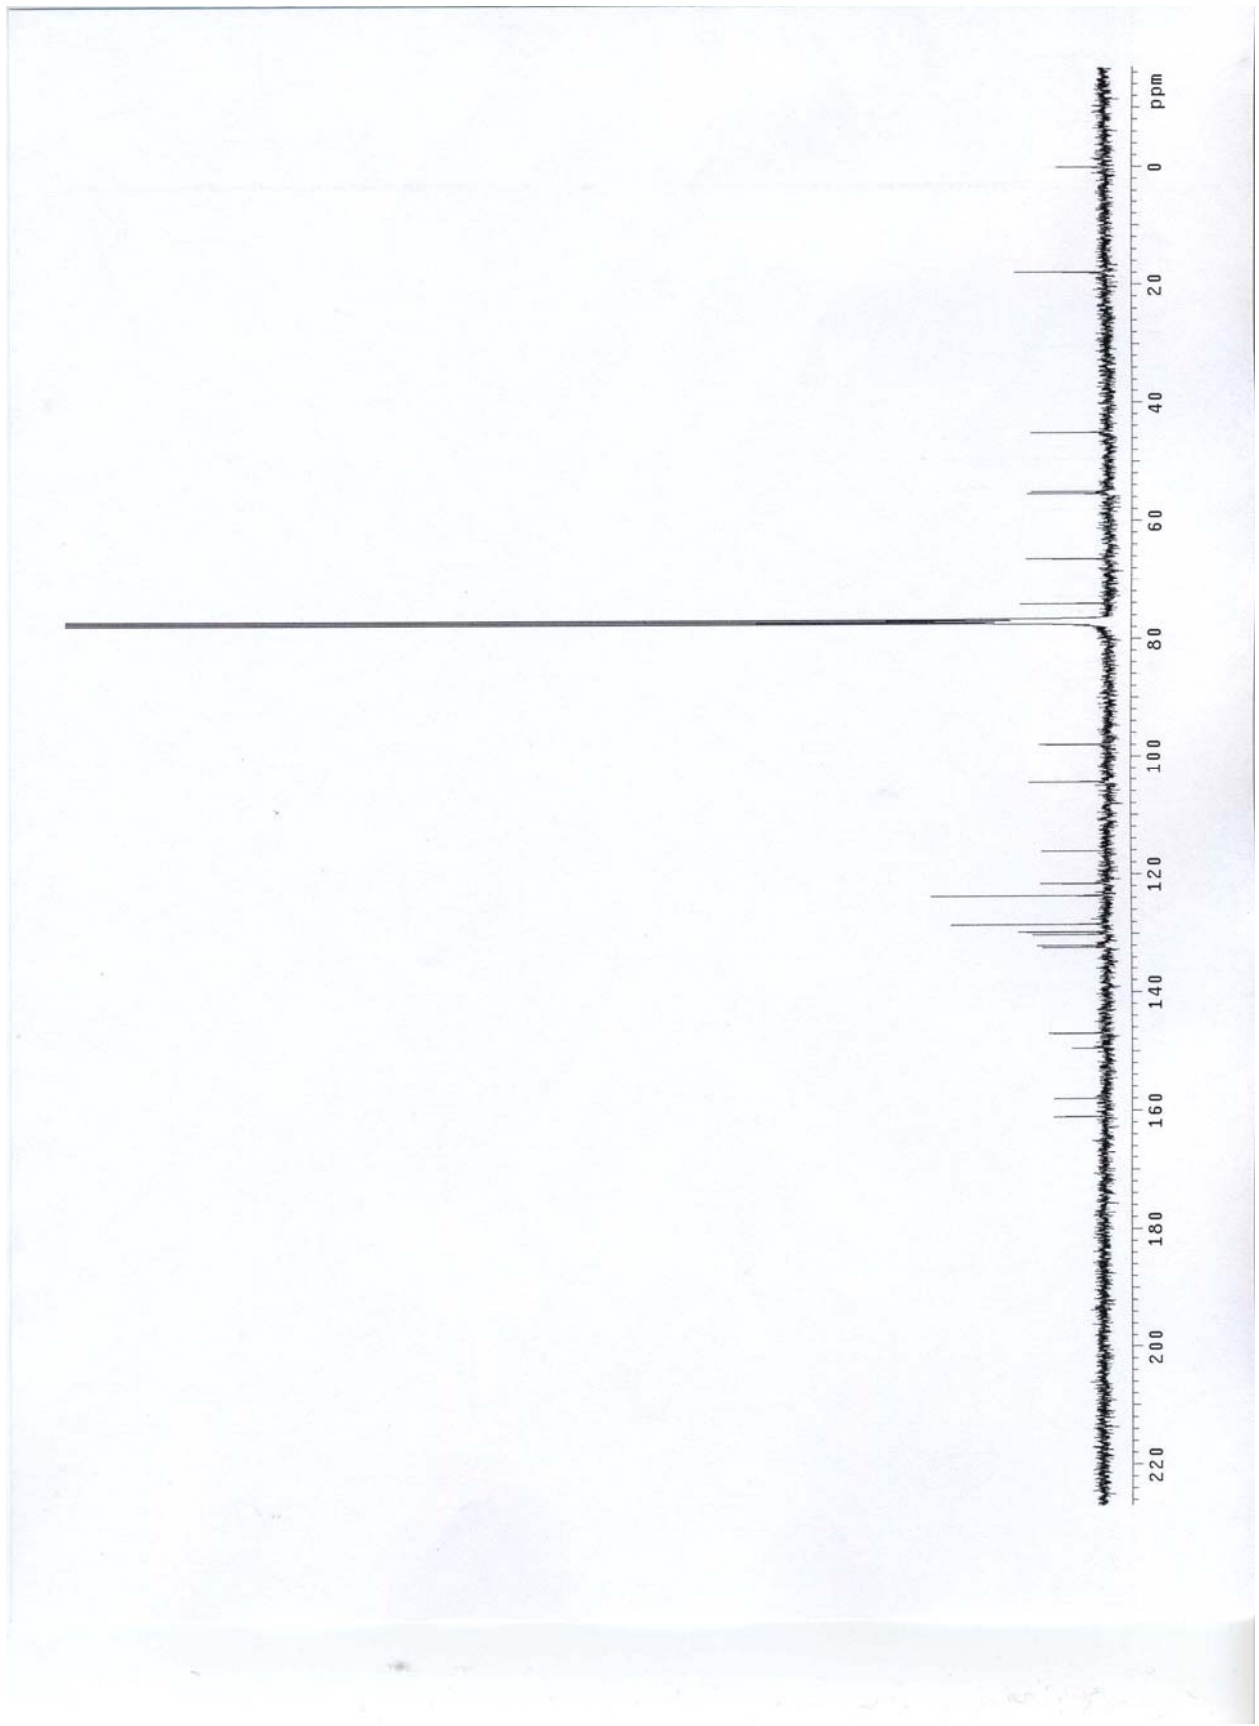

***N*-(5-(benzyloxy)-4-hydroxypent-1-en-3-yl)-*N*-(2,4-dimethoxybenzyl)-4-nitrobenzenesulfonamide (3j)**

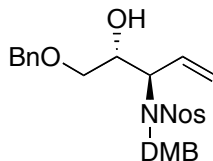

In accordance with the general procedure, the reaction was allowed to stir at 100 °C for 14 hours, at which point the reaction mixture was concentrated *in vacuo* and purified by flash column chromatography (SiO<sub>2</sub>: 35% EtOAc/cyclohexane) to furnish the title compound (83 mg) as a yellow foam in 77% yield.

**<sup>1</sup>H NMR** (400 MHz, CDCl<sub>3</sub>): δ 8.19 (d, *J* = 9.0 Hz, 2H), 7.82 (d, *J* = 9/0 Hz, 2H), 7.34 – 7.27 (m, 6H), 6.4 (dd, *J* = 8.4, 2.3 Hz, 1H), 6.24 (d, *J* = 2.3 Hz, 1H), 5.92 (ddd, *J* = 17.2, 10.4, 6.6 Hz, 1H), 5.2 (d, *J* = 10.4 Hz, 1H), 5.04 (d, *J* = 17.2 Hz, 1H), 4.39 (m, 5H), 3.90 (m, 1H), 3.74 (s, 3H), 3.63 (s, 3H), 3.46 (dd, *J* = 9.6, 4.3 Hz, 1H), 3.39 (dd, *J* = 9.6, 6.4 Hz, 1H), 2.51 (s, 1H).

**<sup>13</sup>C NMR** (100 MHz, CDCl<sub>3</sub>): δ 161.0, 158.0, 149.6, 146.6, 137.8, 132.0, 131.8, 128.5, 128.4, 127.8, 127.8, 123.9, 121.5, 116.2, 104.5, 98.1, 73.3, 71.0, 70.9, 63.1, 55.4, 55.1, 44.6.

**HRMS** (EI): Calcd. for C<sub>27</sub>H<sub>30</sub>N<sub>2</sub>O<sub>8</sub>SNa (M+23): 565.1614, Found: 565.1615.

**FTIR** (neat) – 3507, 2939, 1733, 1587, 1529, 1421, 1372, 1243, 1130, 1038 cm<sup>-1</sup>.

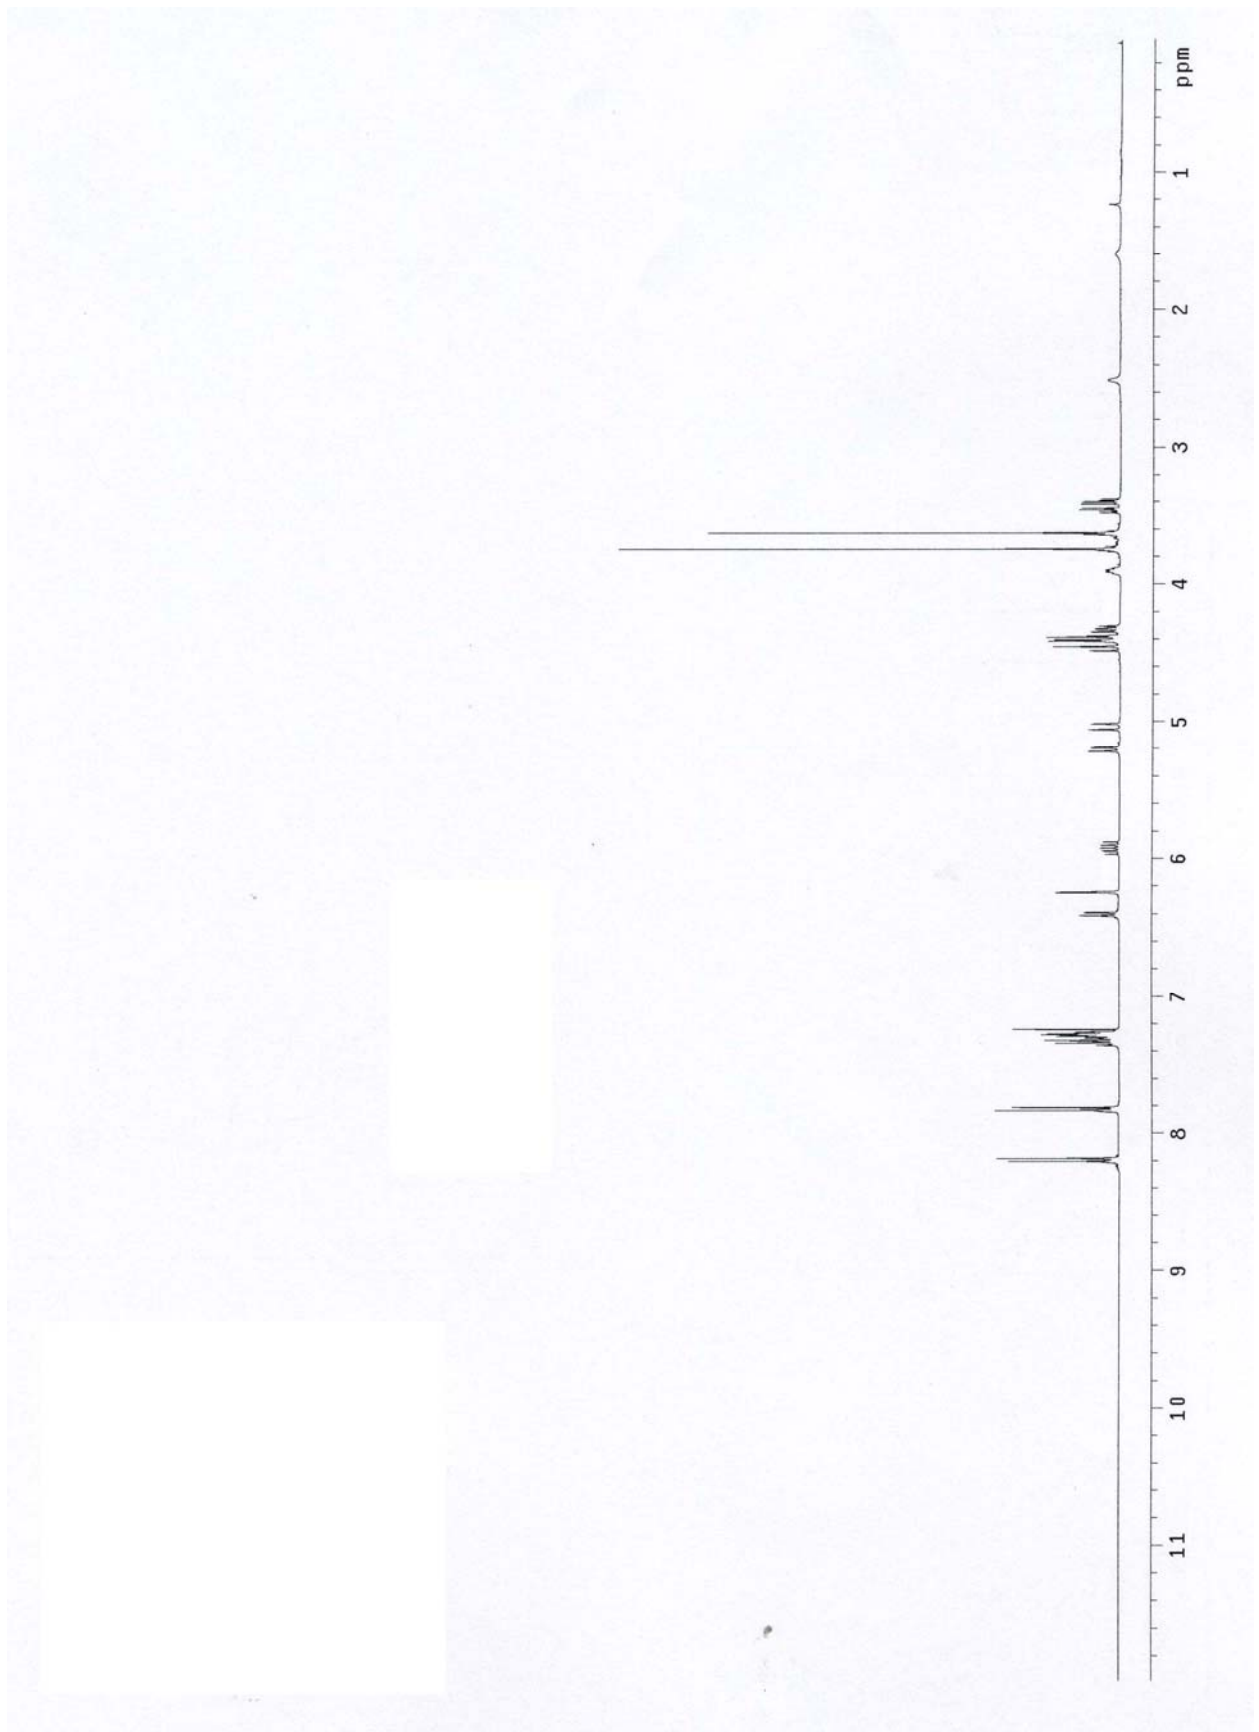

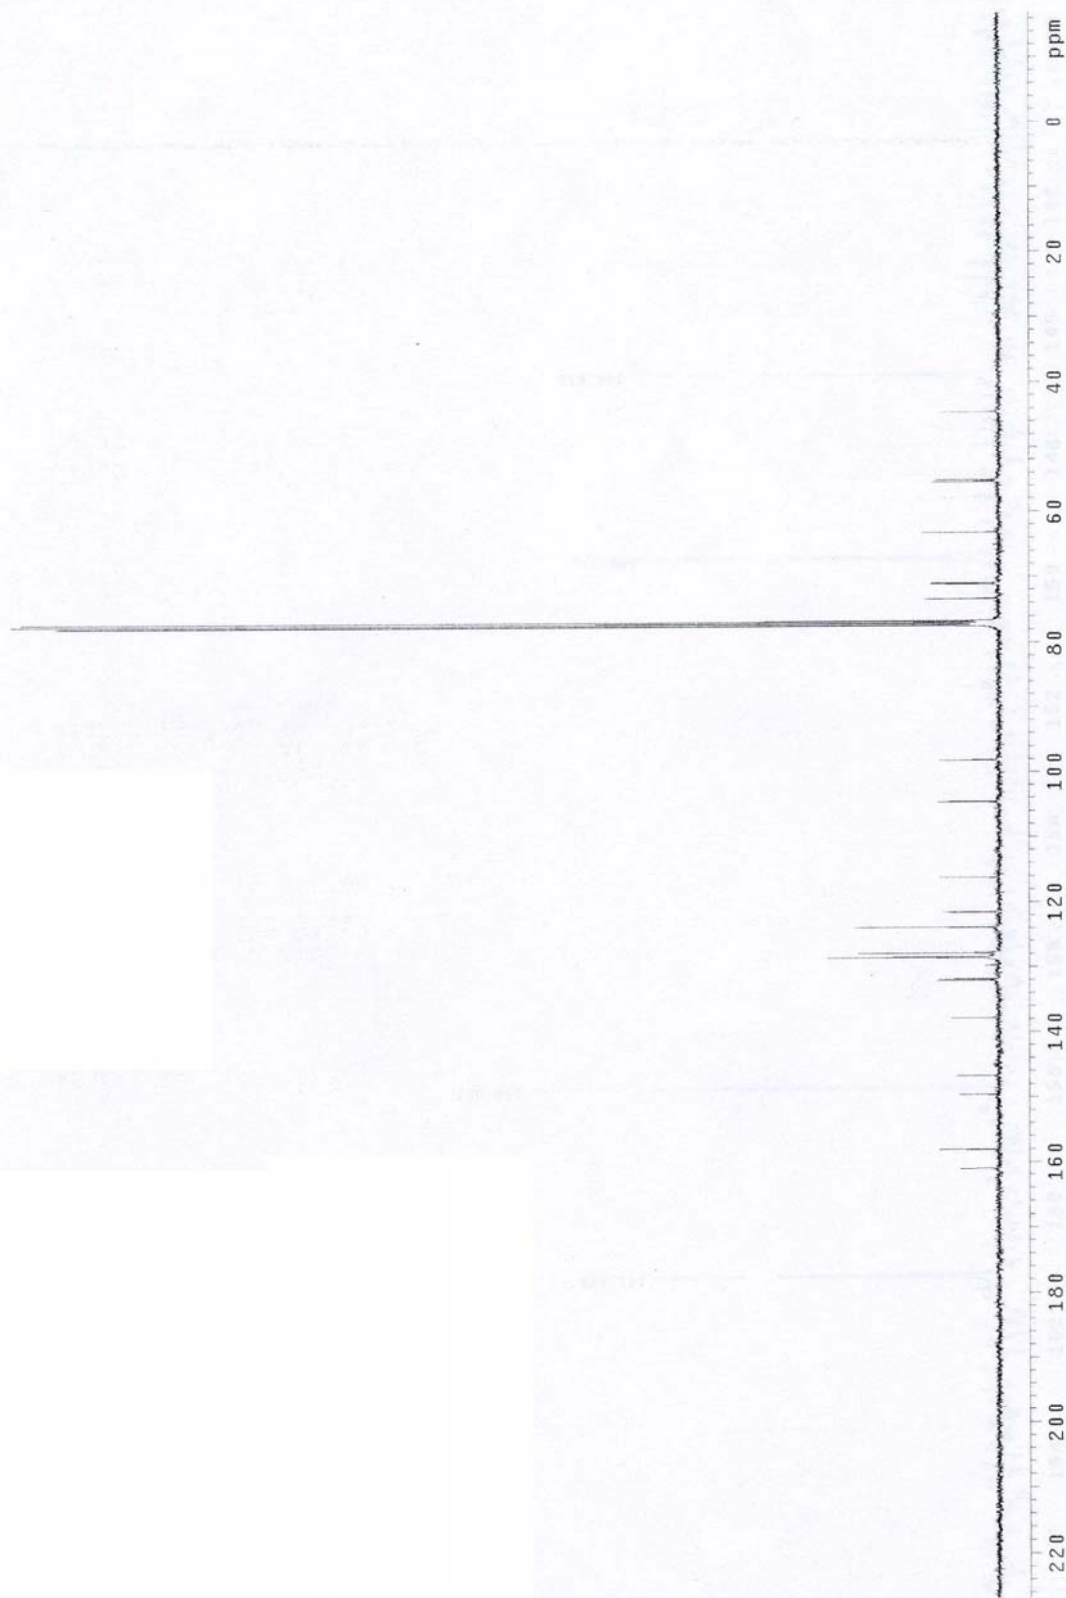

***N*-(2,4-dimethoxybenzyl)-*N*-(5-(1,3-dioxoisindolin-2-yl)-4-hydroxypent-1-en-3-yl)-4-nitrobenzenesulfonamide (3k)**

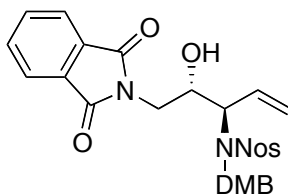

In accordance with the general procedure, the reaction was allowed to stir at 100 °C for 14 hours, at which point the reaction mixture was concentrated *in vacuo* and purified by flash column chromatography (SiO<sub>2</sub>: 35% EtOAc/cyclohexane) to furnish the title compound (99 mg) as a white foam in 85% yield.

**<sup>1</sup>H NMR** (400 MHz, CDCl<sub>3</sub>): δ 8.36 (d, *J* = 9.0 Hz, 2H), 7.86 (d, *J* = 9.0 Hz, 2H), 7.82 (d, *J* = 5.7 Hz, 1H), 7.81 (d, *J* = 5.5 Hz, 1H), 7.71 (d, *J* = 5.7 Hz, 1H), 7.70 (d, *J* = 5.5 Hz, 1H), 7.25 (d, *J* = 8.6 Hz, 1H), 6.38 (dd, *J* = 8.6, 2.3 Hz, 1H), 6.14 (d, *J* = 2.3 Hz, 1H), 6.02 (ddd, *J* = 16.6, 10.4, 6.8 Hz, 1H), 5.32 (d, *J* = 10.4 Hz, 1H), 5.25 (d, *J* = 16.6 Hz, 1H), 4.38 (d, *J* = 3.7 Hz, 2H), 4.19 (dd, *J* = 6.8, 5.1 Hz, 1H), 4.13 (m, 1H), 3.80 (dd, *J* = 14.3, 4.5 Hz, 1H), 3.69 (s, 3H), 3.60 (s, 3H), 3.57 (dd, *J* = 14.3, 7.8 Hz, 1H), 3.02 (s, 1H).

**<sup>13</sup>C NMR** (100 MHz, CDCl<sub>3</sub>): δ 168.6, 161.0, 158.0, 149.6, 146.4, 134.1, 132.1, 131.8, 130.6, 128.6, 123.8, 123.4, 122.6, 115.5, 104.5, 98.1, 71.5, 64.3, 55.3, 55.1, 45.1, 41.9.

**HRMS** (EI): Calcd. for C<sub>28</sub>H<sub>27</sub>N<sub>3</sub>O<sub>9</sub>SNa (M+23): 604.1361, Found: 604.1360.

**FTIR** (neat) – 3506, 2940, 2360, 1771, 1611, 1529, 1348, 1158, 1035 cm<sup>-1</sup>.

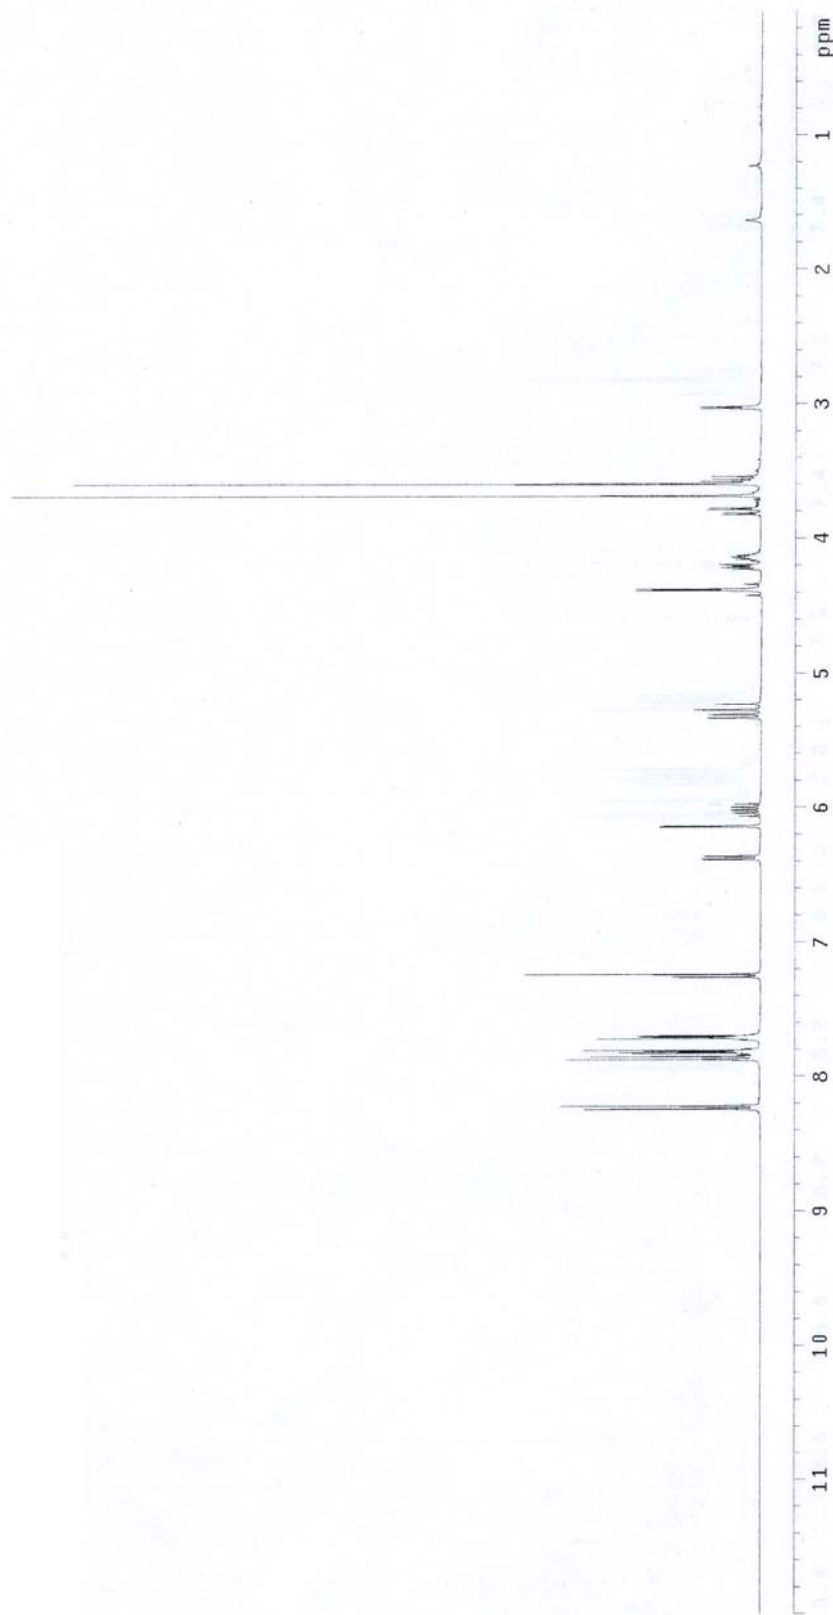



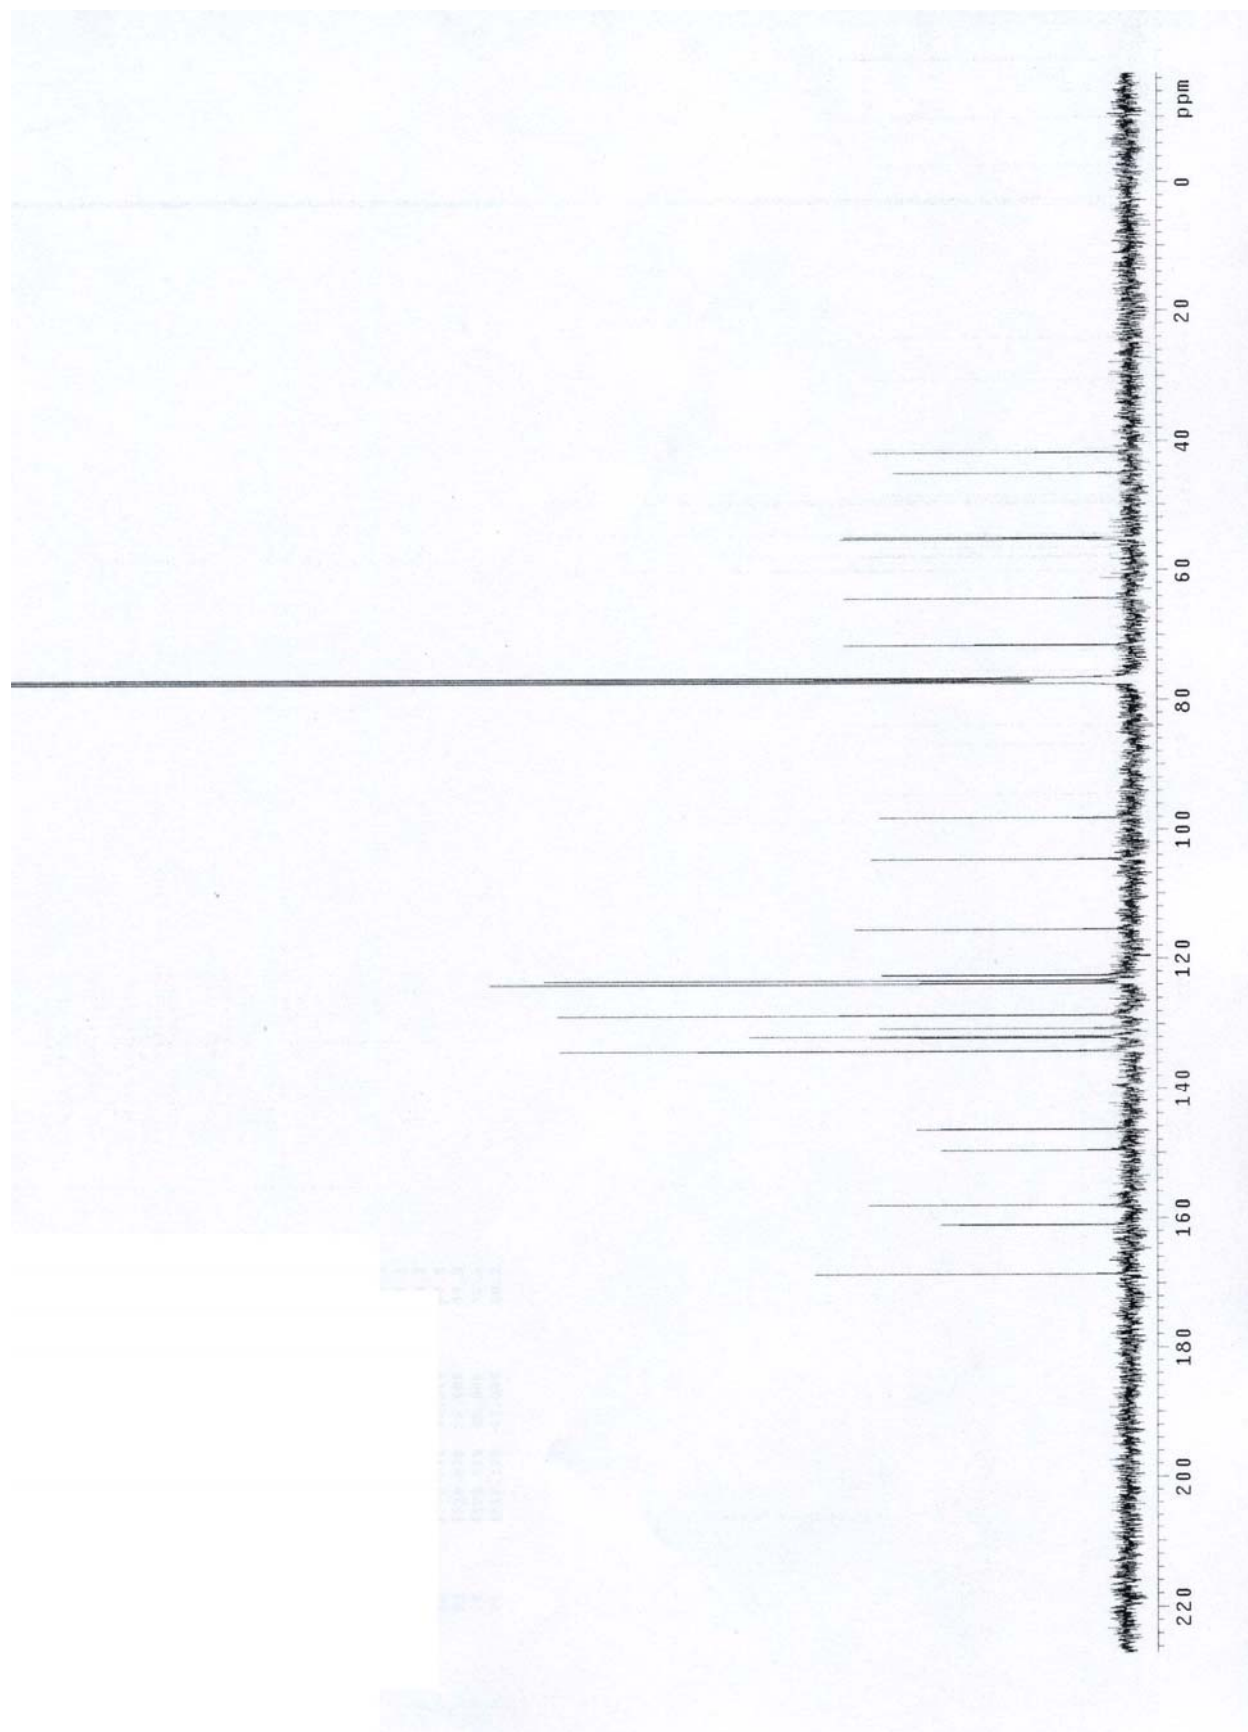

***N*-(2,4-dimethoxybenzyl)-*N*-(4-hydroxydec-1-en-3-yl)-4-nitrobenzenesulfonamide (3l)**

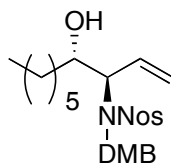

In a modification of the general procedure employing 200 mol% of allene **1e** (0.4 mmol), the reaction was allowed to stir at 100 °C for 18 hours, at which point the reaction mixture was concentrated *in vacuo* and purified by flash column chromatography (SiO<sub>2</sub>: 20% EtOAc/cyclohexane) to furnish the title compound (70 mg) as a yellow oil in 69% yield.

**<sup>1</sup>H NMR** (400 MHz, CDCl<sub>3</sub>): δ 8.22 (d, *J* = 9.0 Hz, 2H), 7.82 (d, *J* = 9.0 Hz, 2H), 7.33 (d, *J* = 8.4 Hz, 1H), 6.44 (dd, *J* = 8.4, 2.6 Hz, 1H), 6.23 (d, *J* = 2.6 Hz, 1H), 5.94 (ddd, *J* = 17.2, 10.4, 6.8 Hz, 1H), 5.25 (d, *J* = 10.4 Hz, 1H), 5.08 (d, *J* = 17.2 Hz, 1H), 4.39 (s, 1H), 4.38 (s, 1H), 4.15 (q, *J* = 4.7 Hz, 1H), 3.76 (s, 3H), 3.67 (s, 4H), 2.06 (s, 1H), 1.45 – 1.02 (m, 10H), 0.85 (t, *J* = 6.8 Hz, 3H).

**<sup>13</sup>C NMR** (100 MHz, CDCl<sub>3</sub>): δ 161.0, 157.9, 149.5, 146.8, 131.9, 131.3, 128.4, 123.7, 122.0, 116.2, 104.6, 98.1, 73.3, 66.4, 55.4, 55.2, 44.6, 33.8, 31.8, 29.2, 25.7, 22.6, 14.1.

**HRMS** (EI): Calcd. for C<sub>25</sub>H<sub>34</sub>N<sub>2</sub>O<sub>7</sub>SNa (M+23): 529.1972, Found: 529.1979

**FTIR** (neat): 3541, 2928, 2856, 1611, 1400, 1347, 1293, 1158, 1131, 1035 cm<sup>-1</sup>.

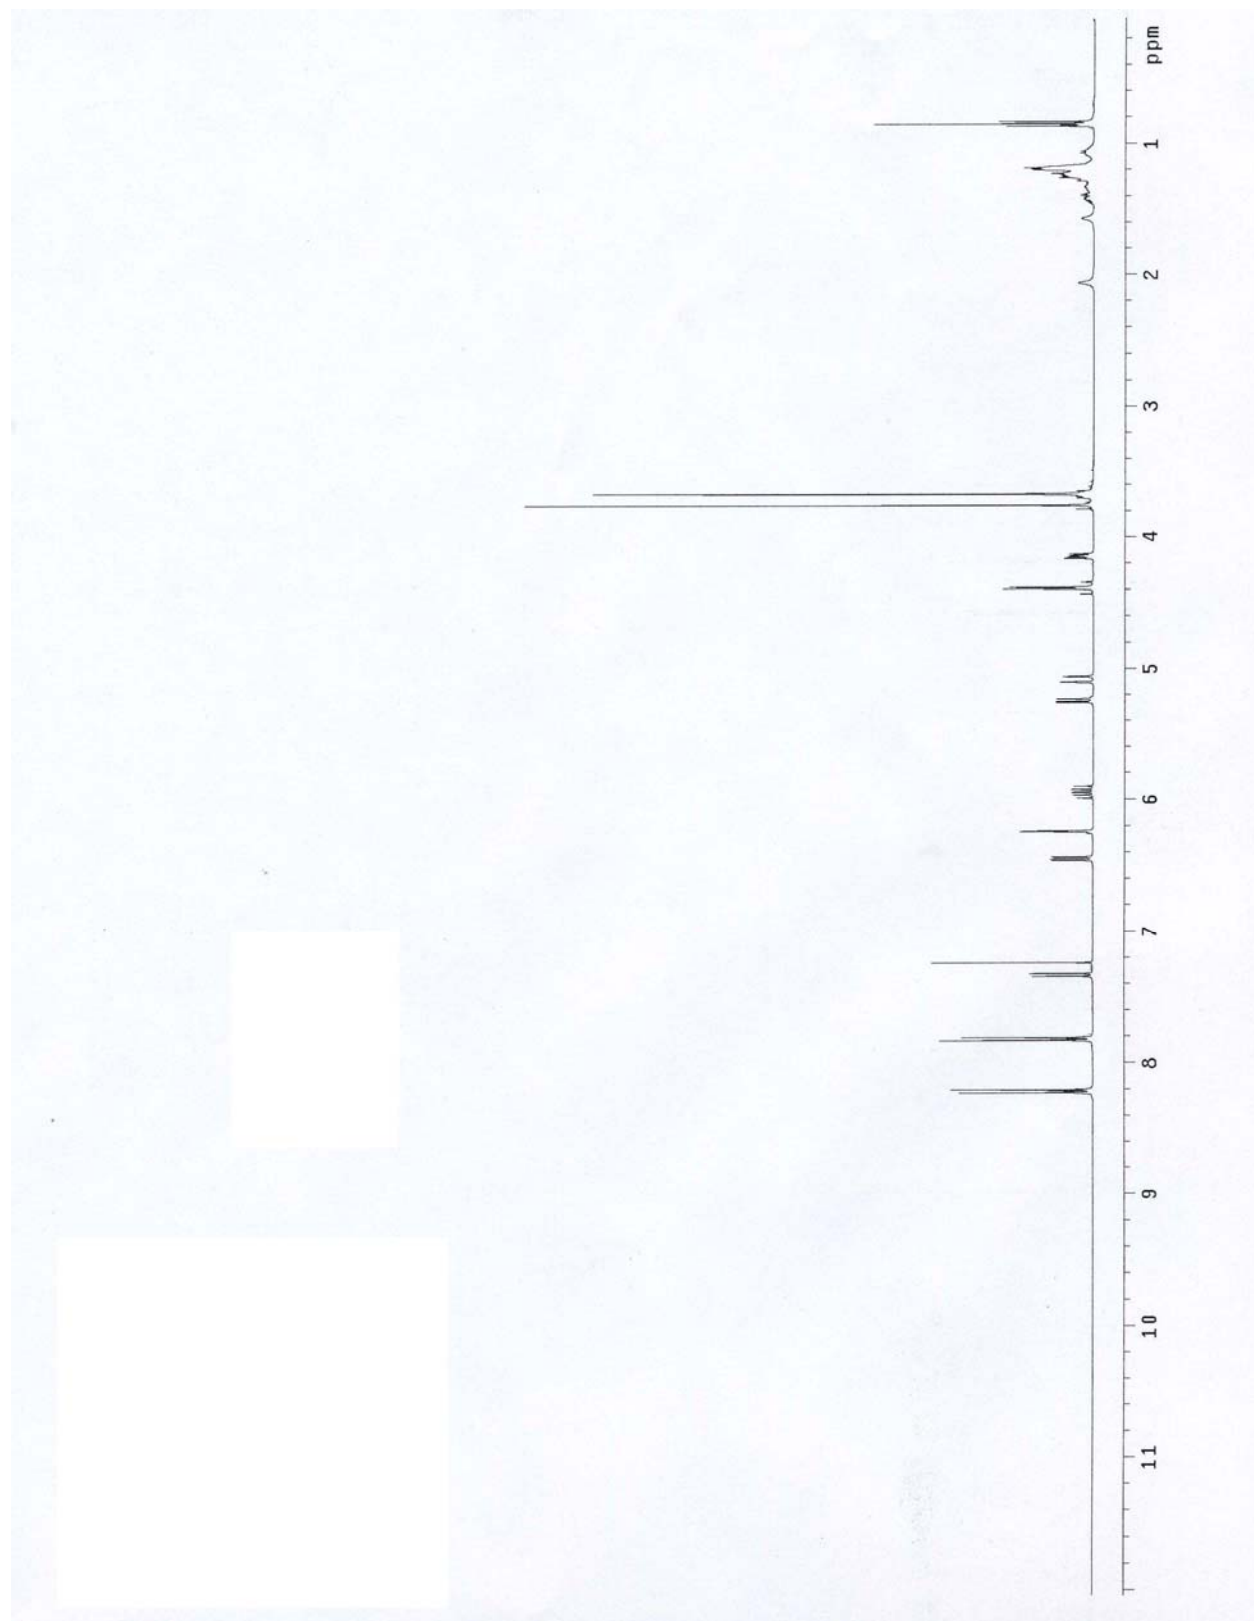

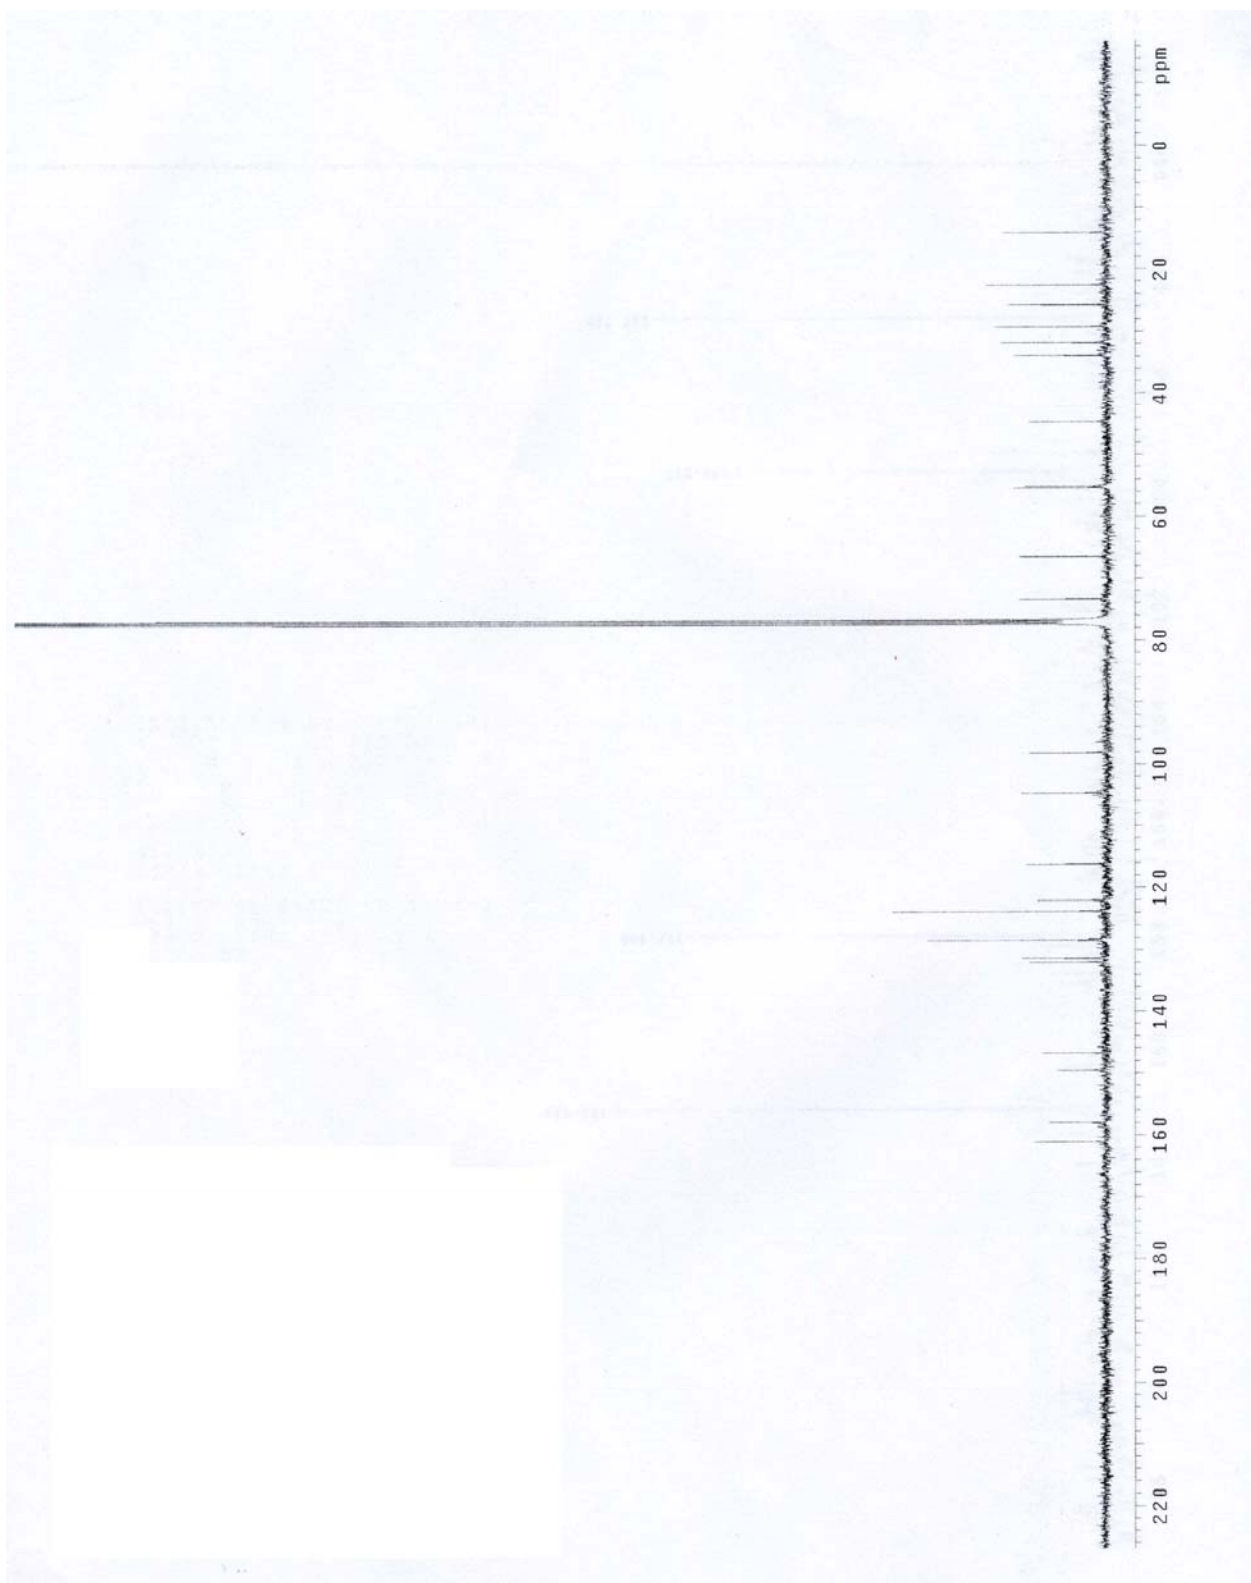

**2-tert-Butyl-1-(4-nitrophenyl)but-3-en-1-ol**

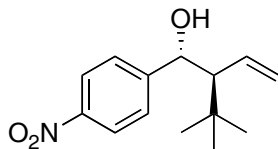

In accordance with the general procedure, the reaction was allowed to stir at 100 °C for 18 hours, at which point the reaction mixture was concentrated *in vacuo* and purified by flash column chromatography (SiO<sub>2</sub>: 5% EtOAc/cyclohexane) to furnish the title compound (40 mg) as a yellow oil in 80% yield. Single crystals suitable for X-ray diffraction analysis were obtained by slow evaporation from hexanes.

**<sup>1</sup>H NMR** (400 MHz, CDCl<sub>3</sub>): δ 8.17 (d, *J* = 8.8 Hz, 2H), 7.42 (d, *J* = 8.8 Hz, 2H), 5.89 (dt, *J* = 17.2, 10.2 Hz, 1H), 5.09 – 5.06 (m, 1H), 4.58 (d, *J* = 10.2 Hz, 1H), 4.54 (d, *J* = 17.2 Hz, 1H), 1.90 (d, *J* = 7.8 Hz, 1H), 1.86 (d, *J* = 4.2 Hz, 1H), 1.05 (s, 9H).

**<sup>13</sup>C NMR** (100 MHz, CDCl<sub>3</sub>): δ 152.7, 146.8, 132.8, 126.7, 123.2, 119.9, 72.8, 62.1, 33.2, 28.7.

**HRMS** (CI): Calcd. for C<sub>14</sub>H<sub>20</sub>NO<sub>3</sub> (M+1): 250.1443, Found: 250.1447

**FTIR** (neat) – 3536, 2949, 1596, 1363, 1341, 1231, 1107, 1025 cm<sup>-1</sup>.

**M.P.** 143 – 147 °C

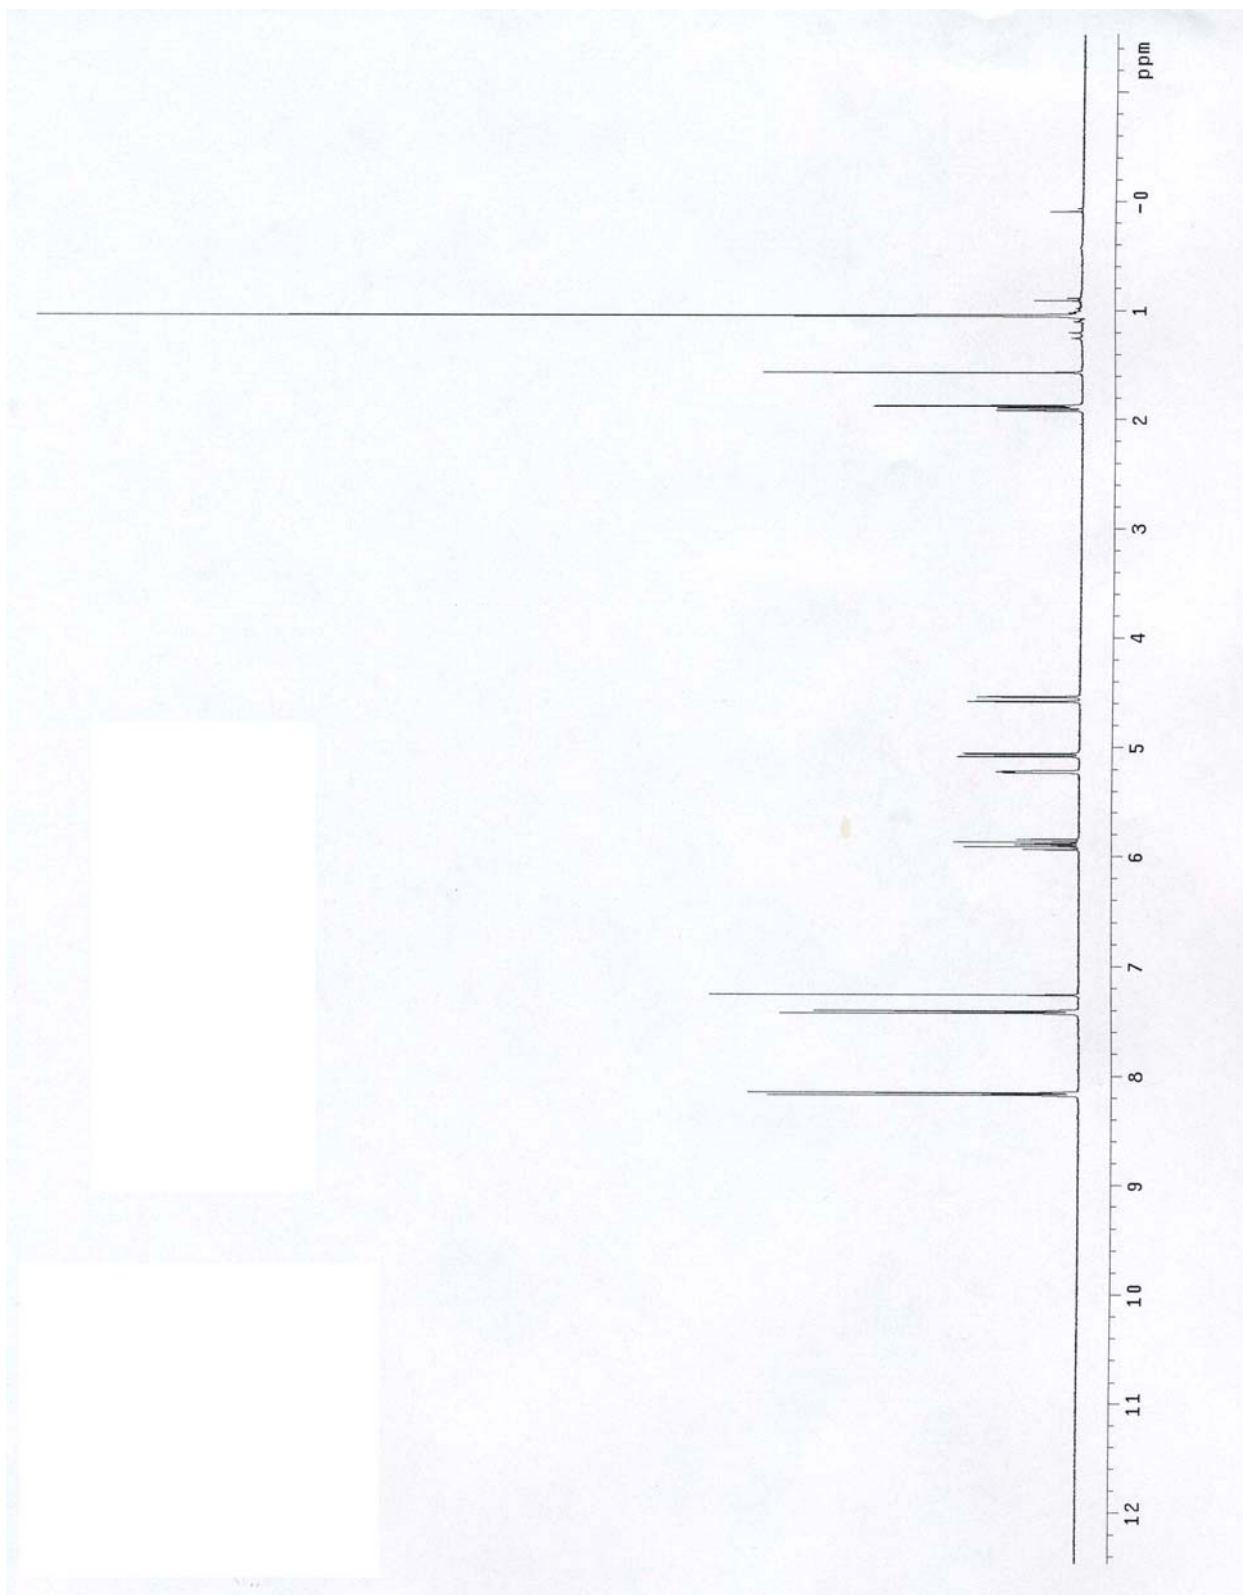

Archive directory:  
Sample directory:

Pulse Sequence: s2pul  
Solvent: cdcl3  
Ambient temperature  
User: 1-14-87  
File: es-7-85\_s2pul\_C13  
INOVA-500 -mmrelroy

Relax. delay 2.000 sec  
Pulse 30.0 degree  
Acq. time 08.30 sec  
Waltz 2050.30 Hz  
2000 repetitions  
OBSERVE C13 100.5309747 MHZ  
DECOUPLE H1 399.8067105 MHZ  
Power 44 dB,  
continuously on  
WALTZ-16 modulated  
DATA PROCESSING  
Line broadening 2.0 Hz  
FI size 65536  
Total time 1 hr, 50 min, 18 sec

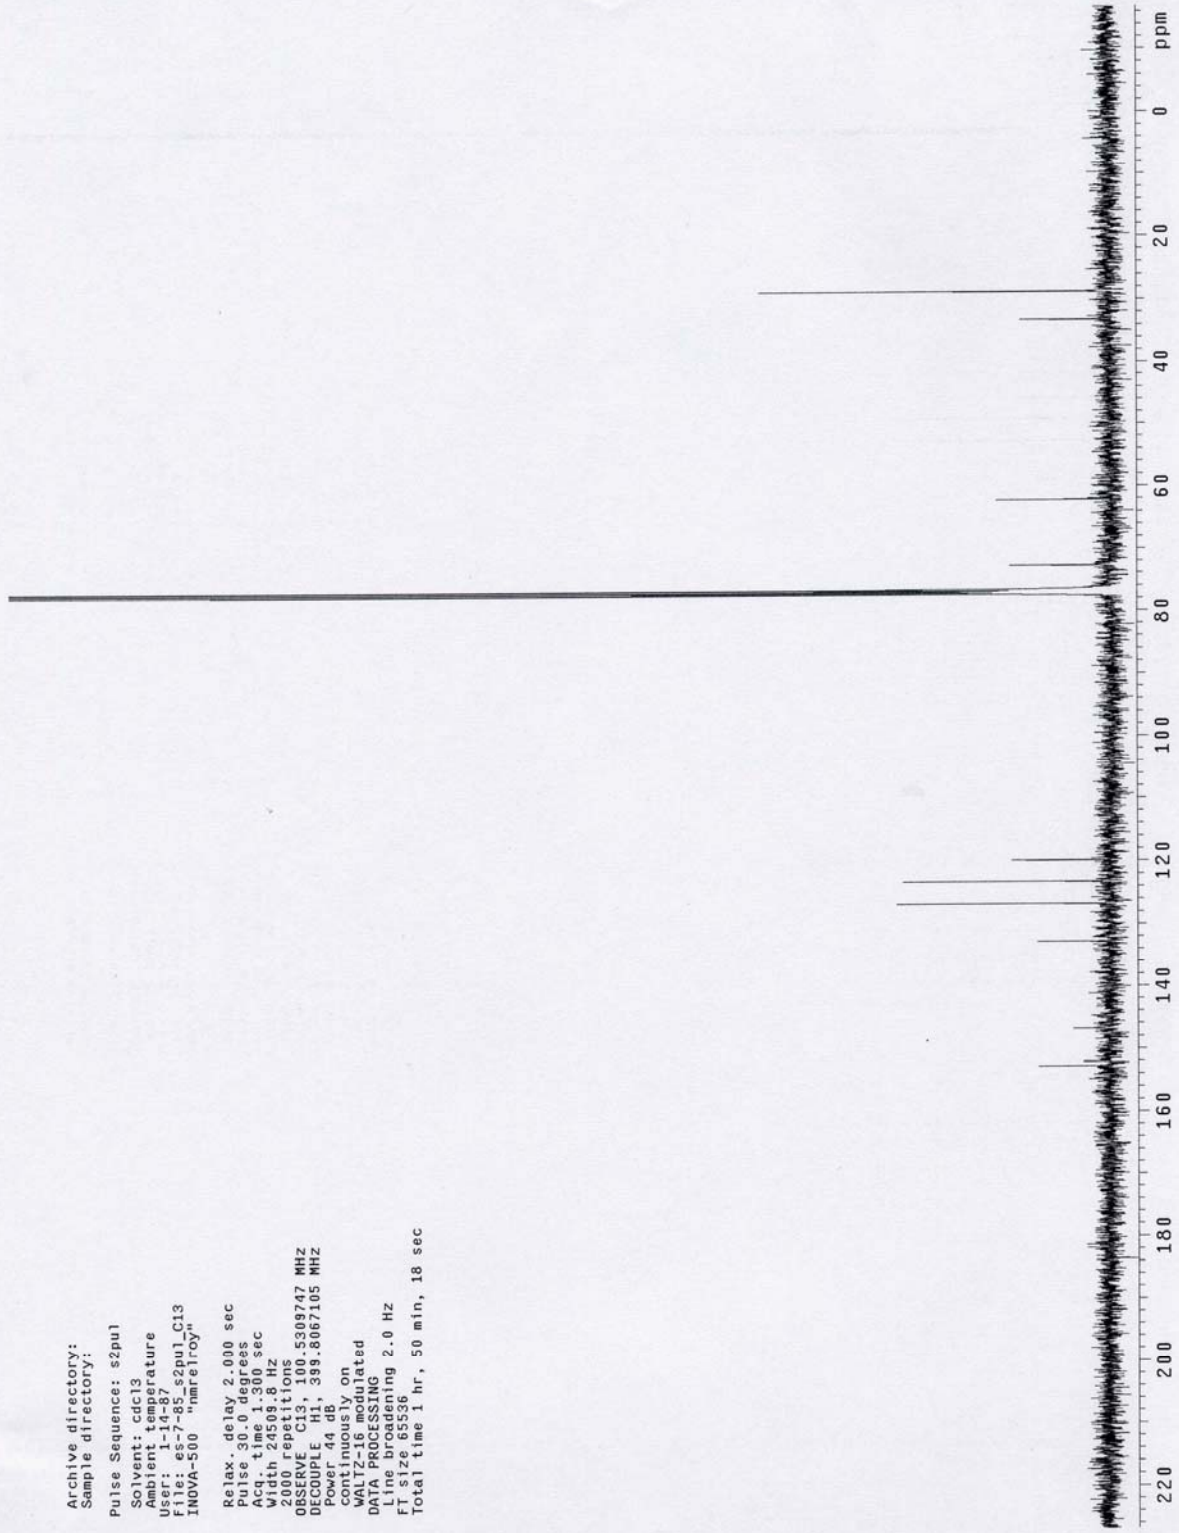

**(1R,2R)-2-isopropyl-1-(4-nitrophenyl)but-3-en-1-ol**

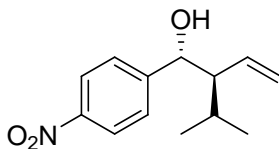

In accordance with the general procedure, the reaction was allowed to stir at 100 °C for 18 hours, at which point the reaction mixture was concentrated *in vacuo* and purified by flash column chromatography (SiO<sub>2</sub>: 5% EtOAc/cyclohexane) to furnish the title compound (37 mg, 6:1 d.r A:B) as a yellow oil in 79% yield.

**<sup>1</sup>H NMR** (400 MHz, CDCl<sub>3</sub>): δ 8.19 (d, *J* = 8.8 Hz, 2H of A), 8.17 (d, *J* = 8.8 Hz, 2H of B), 7.49 (d, *J* = 8.8 Hz, 2H of A), 7.42 (d, *J* = 8.8 Hz, 2H of B), 5.75 (dt, *J* = 17.0, 10.2 Hz, 1H of A), 5.38 (dt, *J* = 17.0, 10.3 Hz, 1H of B), 5.26 (dd, *J* = 10.2, 2.0 Hz, 1H of A), 5.05 (dd, *J* = 17.2, 2.0 Hz, 1H of A), 5.00 (dd, *J* = 10.2, 2.0 Hz, 1H of B), 4.79 (d, *J* = 7.0 Hz, 1H of A), 4.83 – 4.79 (m, 2H of B), 2.23 – 2.15 (m, 2H), 2.08 – 1.92 (m, 2H), 1.69 – 1.56 (m, 1H of B), 1.54 – 1.41 (m, 1H of A), 0.97 (d, *J* = 6.7 Hz, 6H of B), 0.89 (d, *J* = 6.7 Hz, 6H of A).

**<sup>13</sup>C NMR** (100 MHz, CDCl<sub>3</sub>): δ 150.7, 150.6, 147.3, 147.2, 134.6, 134.2, 127.7, 127.5, 127.7, 127.5, 123.5, 123.3, 120.9, 119.5, 73.9, 73.6, 59.2, 58.2, 27.7, 27.0, 21.7, 21.6, 18.2, 17.7.

**HRMS** (CI): Calcd. for C<sub>13</sub>H<sub>18</sub>NO<sub>3</sub> (M+1): 236.1287, Found: 236.1292

**FTIR** (neat) – 3448, 2959, 1604, 1516, 1345, 1231, 1108, 856 cm<sup>-1</sup>.



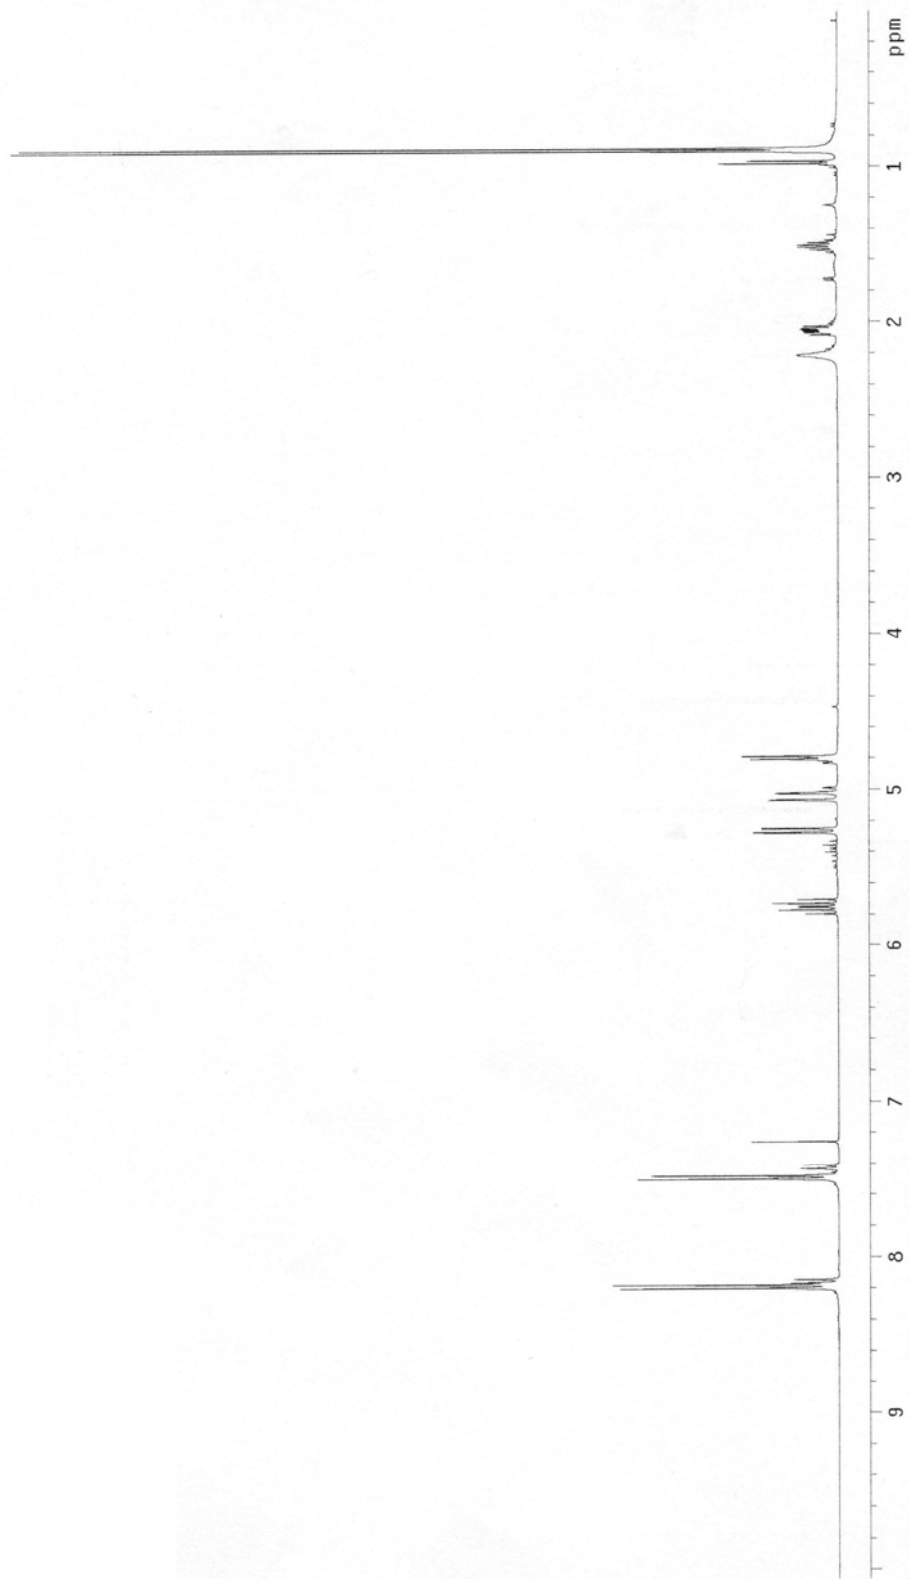

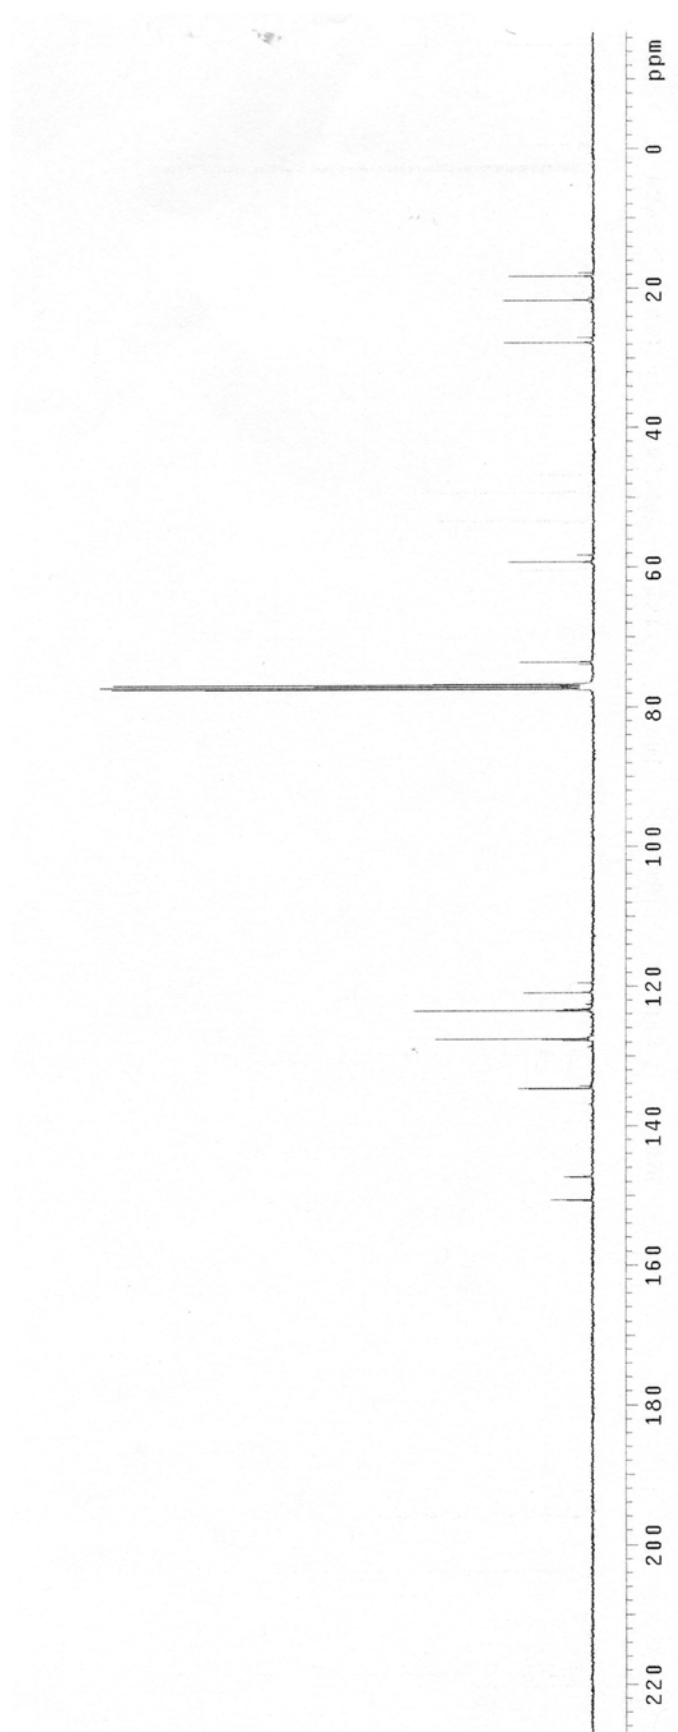

**(1*R*,2*R*)-2-ethyl-1-(4-nitrophenyl)but-3-en-1-ol**

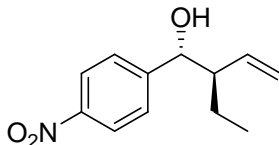

In accordance with the general procedure, the reaction was allowed to stir at 100 °C for 18 hours, at which point the reaction mixture was concentrated *in vacuo* and purified by flash column chromatography (SiO<sub>2</sub>: 5% EtOAc/cyclohexane) to furnish the title compound (33 mg, 2:1 d.r A:B) as a yellow oil in 75% yield.

**<sup>1</sup>H NMR** (400 MHz, CDCl<sub>3</sub>): δ 8.19 (d, *J* = 8.8 Hz, 2H of A), 8.17 (d, *J* = 8.8 Hz, 2H of B), 7.49 (d, *J* = 8.8 Hz, 2H of A), 7.44 (d, *J* = 8.8 Hz, 2H of B), 5.61 (dt, *J* 17.2, 10.2 Hz, 1H of A), 5.52 – 5.39 (m, 1H of B), 5.28 (d, *J* = 10.2 Hz, 1H of A), 5.16 (d, *J* = 17.2 Hz, 1H of A), 5.14 – 5.09 (m, 1H of B), 5.02 (d, *J* = 17.2 Hz, 1H of B), 4.75 – 4.72 (m, 1H of B), 4.56 (d, *J* = 7.2 Hz, 1H of A), 2.35 – 2.27 (m, 2H), 2.24 – 2.19 (m, 2H), 1.31 – 1.18 (m, 4H), 0.85 – 0.77 (m, 6H).

**<sup>13</sup>CNMR** (100MHz, CDCl<sub>3</sub>): δ 150.1, 150.0, 147.4, 147.2, 137.7, 137.3, 127.7, 127.5, 123.4, 123.2, 120.0, 118.5, 75.9, 75.6, 54.7, 53.3, 23.4, 22.2.

**HRMS** (CI): Calcd. for C<sub>12</sub>H<sub>16</sub>NO<sub>3</sub> (M+1): 222.1130, Found: 222.1128

**FTIR** (neat) – 3421, 2964, 2931, 2875, 1604, 1518, 1346, 1040, 1108, 854 cm<sup>-1</sup>.

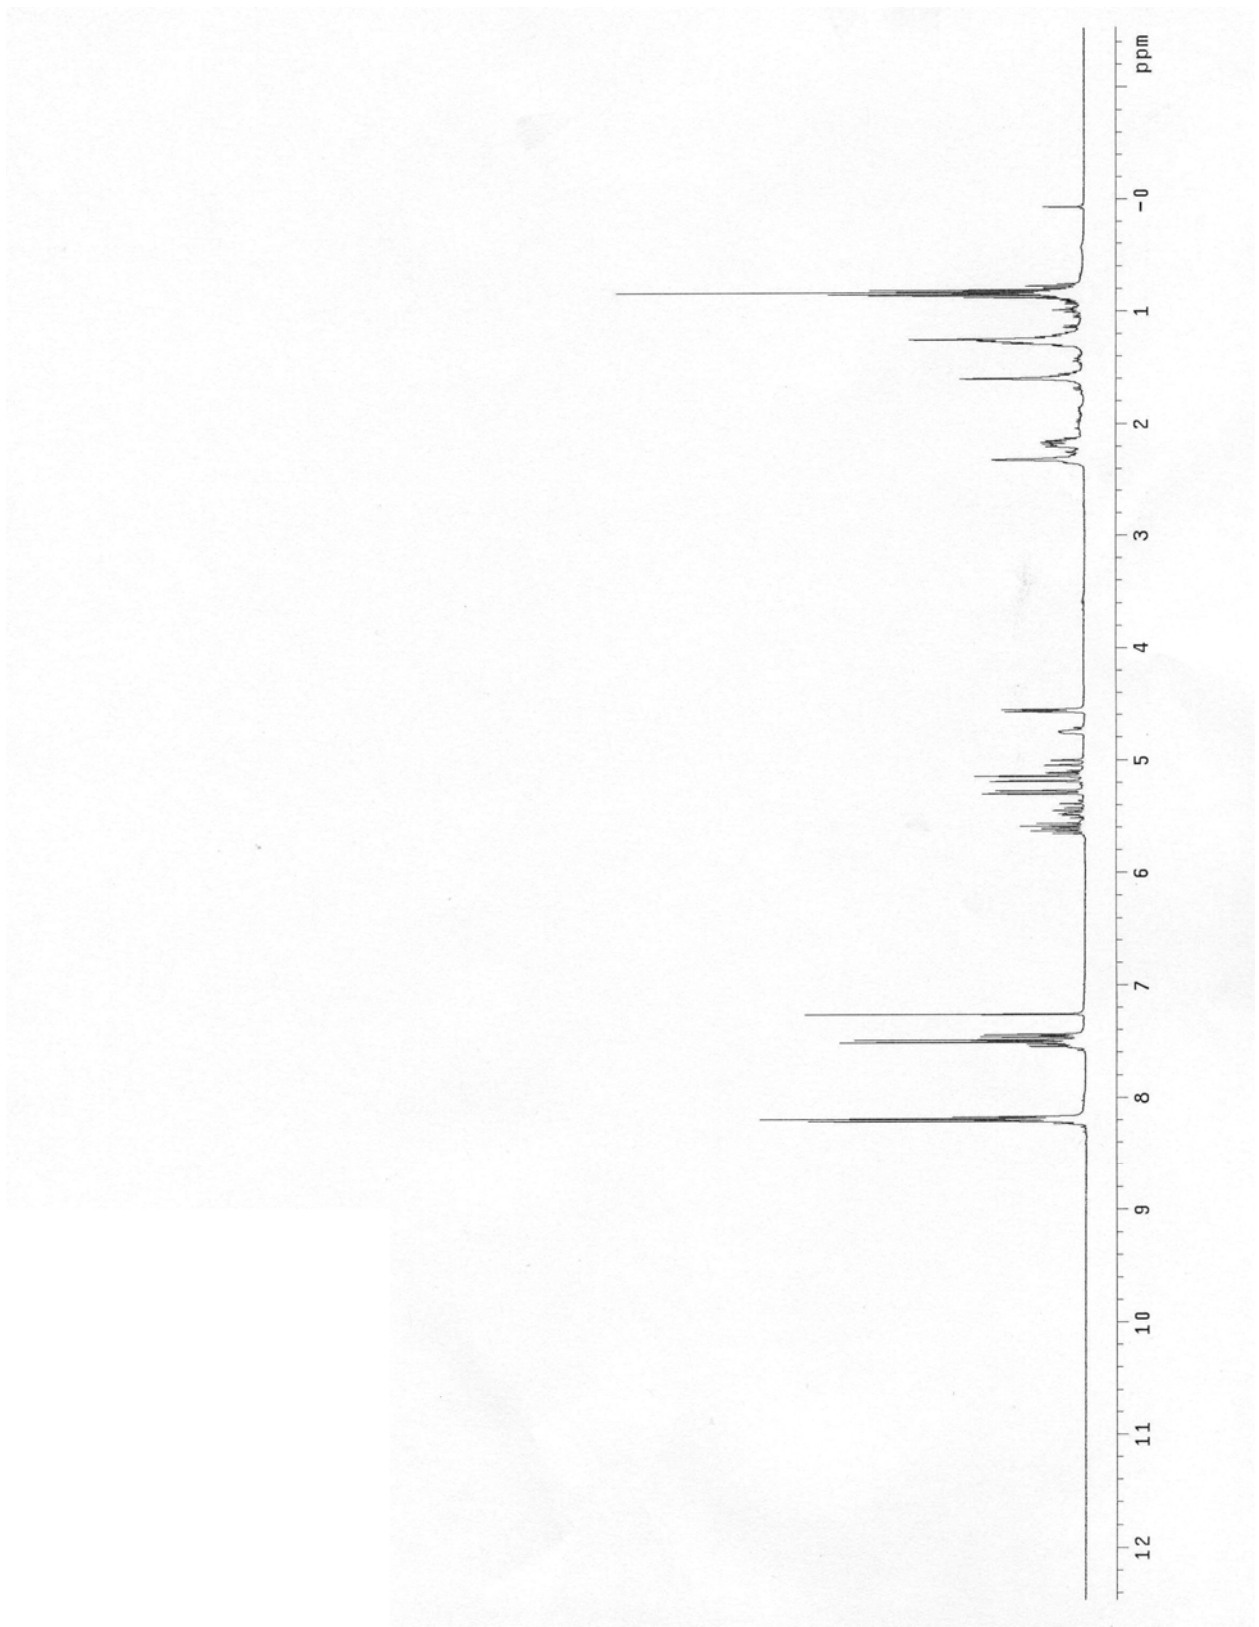

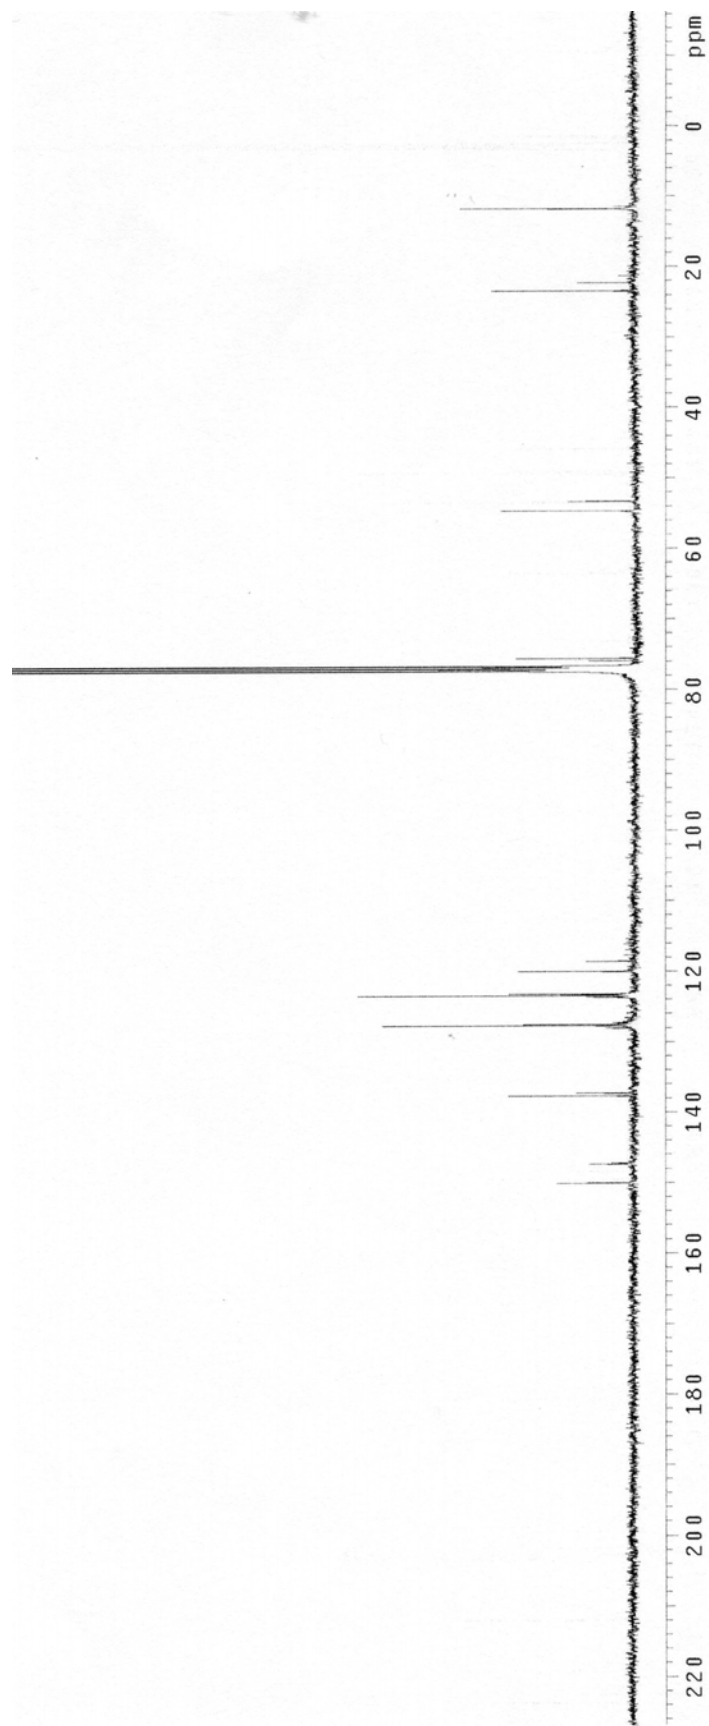

## 2-Methyl-1-(4-nitrophenyl)but-3-en-1-ol

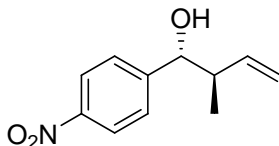

In a modification of the general procedure to a re-sealable pressure tube (13 x 100 mm) equipped with magnetic stir bar was added  $\text{RuBr}(\text{CO})_3(\eta^3\text{-C}_3\text{H}_5)$  (6.2 mg, 0.02 mmol, 5 mol%) and  $\text{Cy}_3\text{P}$  (16.8 mg, 0.06 mmol, 15 mol%). Aldehyde (0.400 mmol, 100 mol%) was added and the tube was sealed with a rubber septum and purged with argon. THF (0.4 mL, 1.0 M concentration with respect to aldehyde) and isopropanol (122  $\mu\text{L}$ , 1.600 mmol, 400 mol%) were added. 1,2-butadiene (48  $\mu\text{L}$ , 0.600 mmol, 150 mol%) was condensed into a 1 dram vial at  $-78\text{ }^\circ\text{C}$  and quickly transferred via syringe to the reaction tube. The rubber septum was quickly replaced with a screw cap and the mixture was heated at  $100\text{ }^\circ\text{C}$  (oil bath temperature) for 18 hours, at which point the reaction mixture was concentrated *in vacuo* and purified by flash column chromatography ( $\text{SiO}_2$ : 10% EtOAc / Hexane) to furnish the title compound (70 mg, 2:1 d.r A:B) as a yellow oil in 85% yield. *The spectroscopic properties of this compound were consistent with the data available in the literature.*<sup>5</sup>

**$^1\text{H NMR}$**  (400 MHz,  $\text{CDCl}_3$ ):  $\delta$  8.19-8.16 (m, 4H), 7.49-7.45 (m, 4H), 5.80-5.67 (m, 2H), 5.21-5.04 (m, 4H), 4.76-4.74 (m, 1H of B), 4.49 (dd,  $J = 7.2, 2.2$  Hz, 1H of A), 2.60-2.56 (m, 1H of B), 2.47-2.41 (m, 1H of A), 2.30 (d,  $J = 2.2$  Hz, 1H of A), 2.11 (d,  $J = 3.4$  Hz, 1H of B), 0.94 (d,  $J = 6.8$  Hz, 3H of B), 0.91 (d,  $J = 6.8$  Hz, 3H of A)

**$^{13}\text{C NMR}$**  (100 MHz,  $\text{CDCl}_3$ ):  $\delta$  149.8, 149.7, 146.3, 146.2, 139.3, 139.2, 127.6, 127.2, 123.4, 123.3, 118.0, 116.7, 76.8, 76.0, 46.6, 44.6, 16.3, 13.2.

<sup>5</sup> Jiang, S.; Agoston, E. G.; Chen, T.; Cabal, M.-P.; Turos, E. *Organometallics* **1995**, *14*, 4697.

***N*-(5-(benzyloxy)-4-hydroxypent-1-en-3-yl)-4-nitrobenzenesulfonamide (4)**

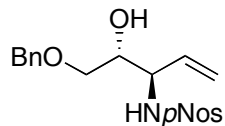

To a stirred solution of **3j** (0.682 g, 1.257 mmol, 100 mol%) in dry toluene/anisole (2:1, 0.3 M with respect to **3j**) under nitrogen at 25 °C was added trifluoroacetic acid (3.27 ml, 43.995 mmol, 3500 mol%). The reaction mixture was heated at 45 °C for 45 min., at which point the reaction mixture was allowed to cool to ambient temperature and saturated NaHCO<sub>3</sub> (aq.) was added. The reaction mixture was transferred to a separatory funnel and the organic layer was separated. The aqueous layer was extracted three times with EtOAc. The combined organic layers were dried (Mg<sub>2</sub>SO<sub>4</sub>), filtered and the filtrate was concentrated *in vacuo*. The residue was purified by flash column chromatography (SiO<sub>2</sub>: 40% EtOAc/hexanes) to furnish the title compound (0.438 g) as yellow oil in 89% yield.

**<sup>1</sup>H NMR** (400 MHz, CDCl<sub>3</sub>): δ 8.27 (d, *J* = 9.0 Hz, 2H), 7.96 (d, *J* = 9.0 Hz, 2H), 7.37 – 7.27 (m, 5H), 5.77 (d, *J* = 8.4 Hz, 1H), 5.53 (ddd, *J* = 17.4, 10.4, 7.2 Hz, 1H), 5.05 (m, 2H), 4.84 (s, 1H), 4.47 (s, 1H), 4.08 – 4.03 (m, 1H), 3.81 (q, *J* = 4.3 Hz, 1H), 3.47 (d, *J* = 4.7 Hz, 2H), 2.56 (s, 1H).

**<sup>13</sup>C NMR** (100 MHz, CDCl<sub>3</sub>): δ 149.9, 146.8, 137.1, 132.8, 128.4, 128.2, 127.8, 124.4, 124.1, 118.9, 73.7, 71.4, 70.9, 59.5.

**HRMS** (CI): Calcd. for C<sub>18</sub>H<sub>21</sub>N<sub>2</sub>O<sub>6</sub>S (M+1): 393.1122, Found: 393.1120.

**FTIR** (neat): 3511, 3289, 2988, 2360, 1606, 1529, 1453, 1349, 1207, 1165 cm<sup>-1</sup>.

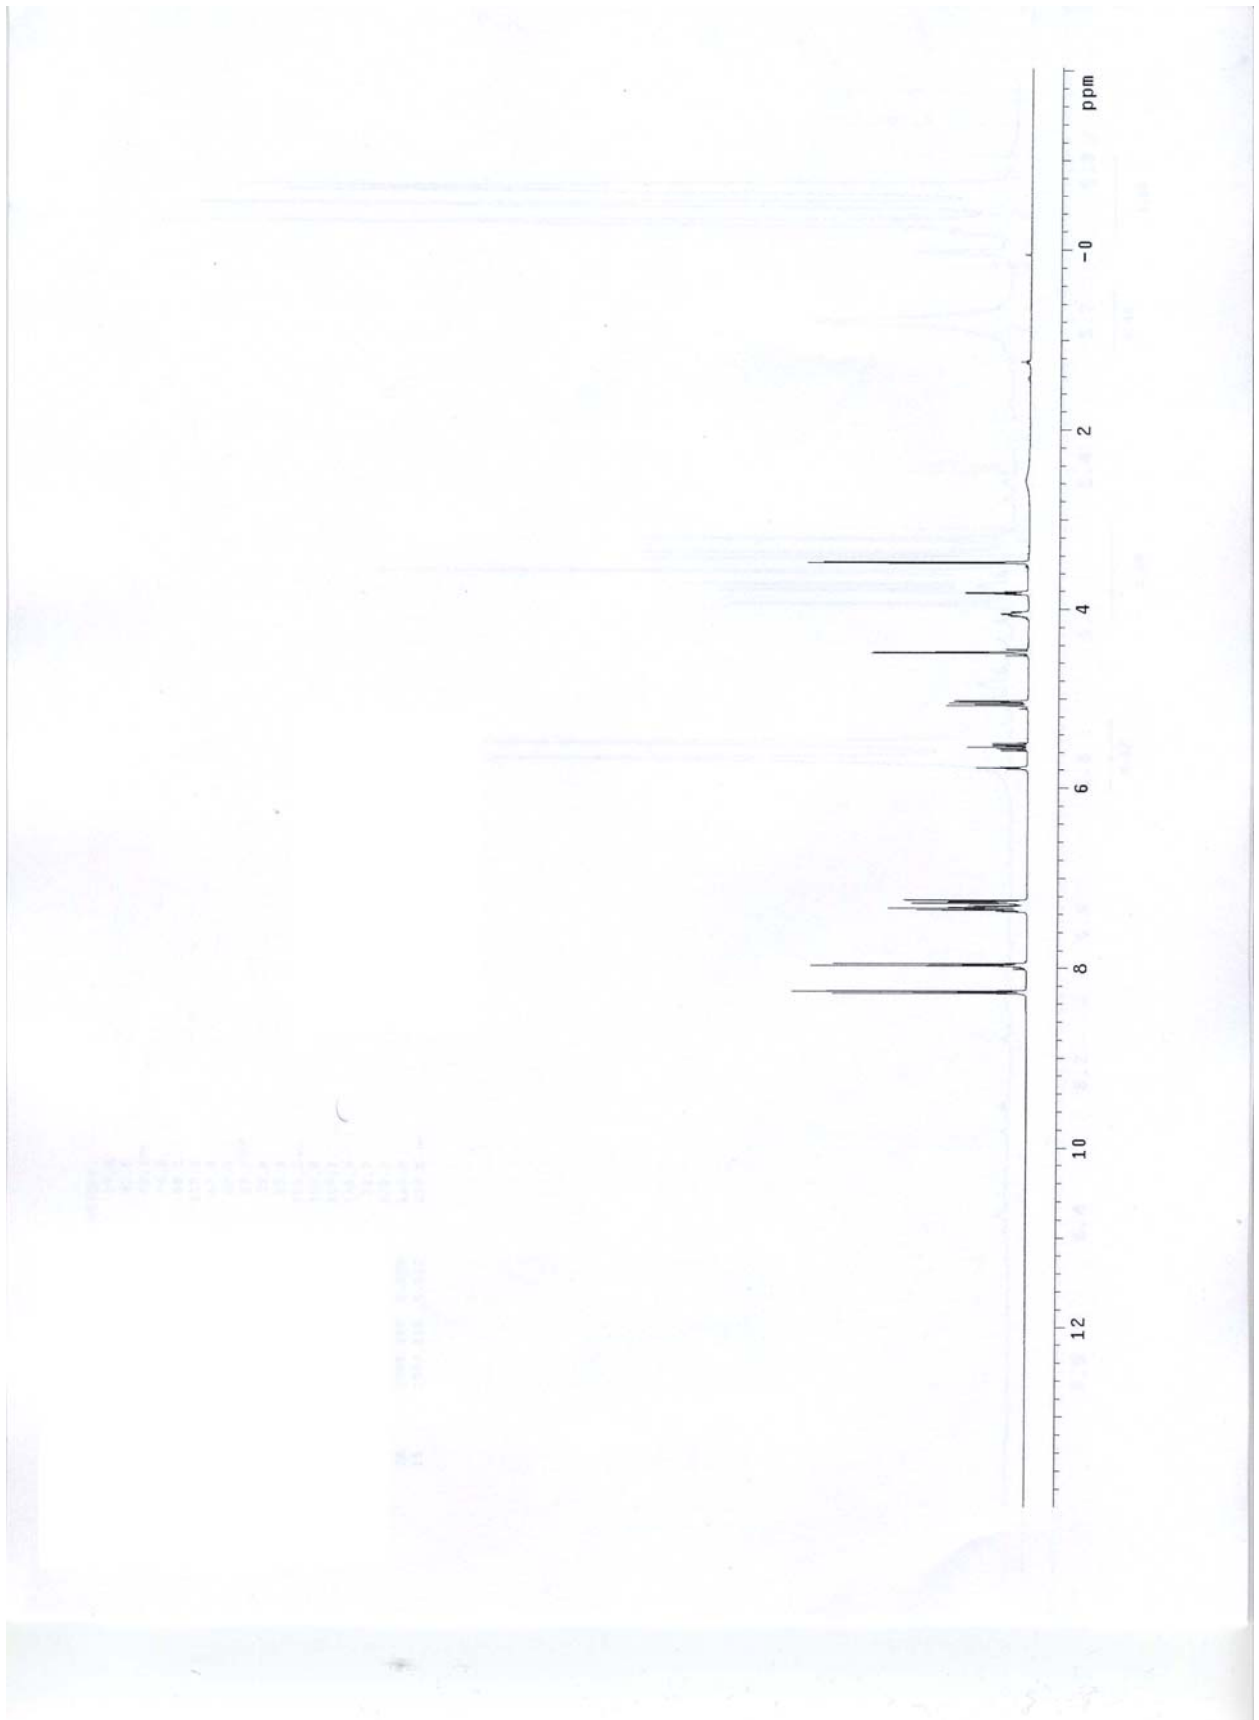





***N*-5-(benzyloxy)-4-(*tert*-butyldimethylsilyloxy)pent-1-en-3-yl)-4-nitrobenzenesulfonamide (5)**

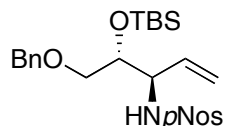

To a stirred solution of compound **4** (0.400 g, 1.02 mmol, 100 mol%) in dry DCM (0.3 M with respect to **4**) under nitrogen at 0 °C was added 2,6-lutidine (0.355 ml, 3.06 mmol, 300 mol%) followed by a drop-wise addition of TBSOTf (0.398 ml, 1.734 mmol, 170 mol%). The mixture was allowed to warm to ambient temperature and was allowed to stir until complete consumption of **4** was observed, as determined by TLC analysis. Saturated NaHCO<sub>3</sub> (aq.) was added drop-wise. The mixture was transferred to a separatory funnel and the organic layer was separated. The aqueous layer was extracted three times with EtOAc. The combined organic layers were washed with aqueous HCl (1N), dried (Mg<sub>2</sub>SO<sub>4</sub>), and filtered. The filtrate was concentrated *in vacuo* and purified by flash column chromatography (SiO<sub>2</sub>: 10% EtOAc/hexanes) to furnish the title compound (0.454 g) as yellow oil in 88% yield.

**<sup>1</sup>H NMR** (400 MHz, CDCl<sub>3</sub>): δ 8.27 (d, *J* = 9.0 Hz, 2H), 7.96 (d, *J* = 9.0 Hz, 2H), 7.37–7.27 (m, 5H), 5.53 (ddd, *J* = 17.6, 9.8, 7.6 Hz, 1H), 5.31 (d, *J* = 8.0 Hz, 1H), 5.05–5.00 (m, 2H), 4.45 (s, 1H), 4.45 (s, 1H), 4.01 (ddd, *J* = 7.8, 6.3, 4.7 Hz, 1H), 3.88–3.84 (m, 1H), 3.40 (dd, *J* = 9.8, 4.7 Hz, 1H), 3.31 (dd, *J* = 9.8, 6.3 Hz, 1H), 0.83 (s, 9H), 0.03 (s, 3H), 0.00 (s, 3H).

**<sup>13</sup>C NMR** (100 MHz, CDCl<sub>3</sub>): δ 149.8, 147.1, 137.5, 133.1, 128.5, 128.4, 127.9, 127.7, 124.1, 118.9, 73.5, 72.9, 71.2, 60.1, 25.7, 18.1, -4.49, -4.92.

**HRMS** (CI): Calcd. for C<sub>24</sub>H<sub>35</sub>N<sub>2</sub>O<sub>6</sub>SSi (M+1): 507.1985, Found: 507.1992.

**FTIR** (neat): 3364, 2929, 2856, 1530, 1349, 1163, 1092, 1023 cm<sup>-1</sup>.

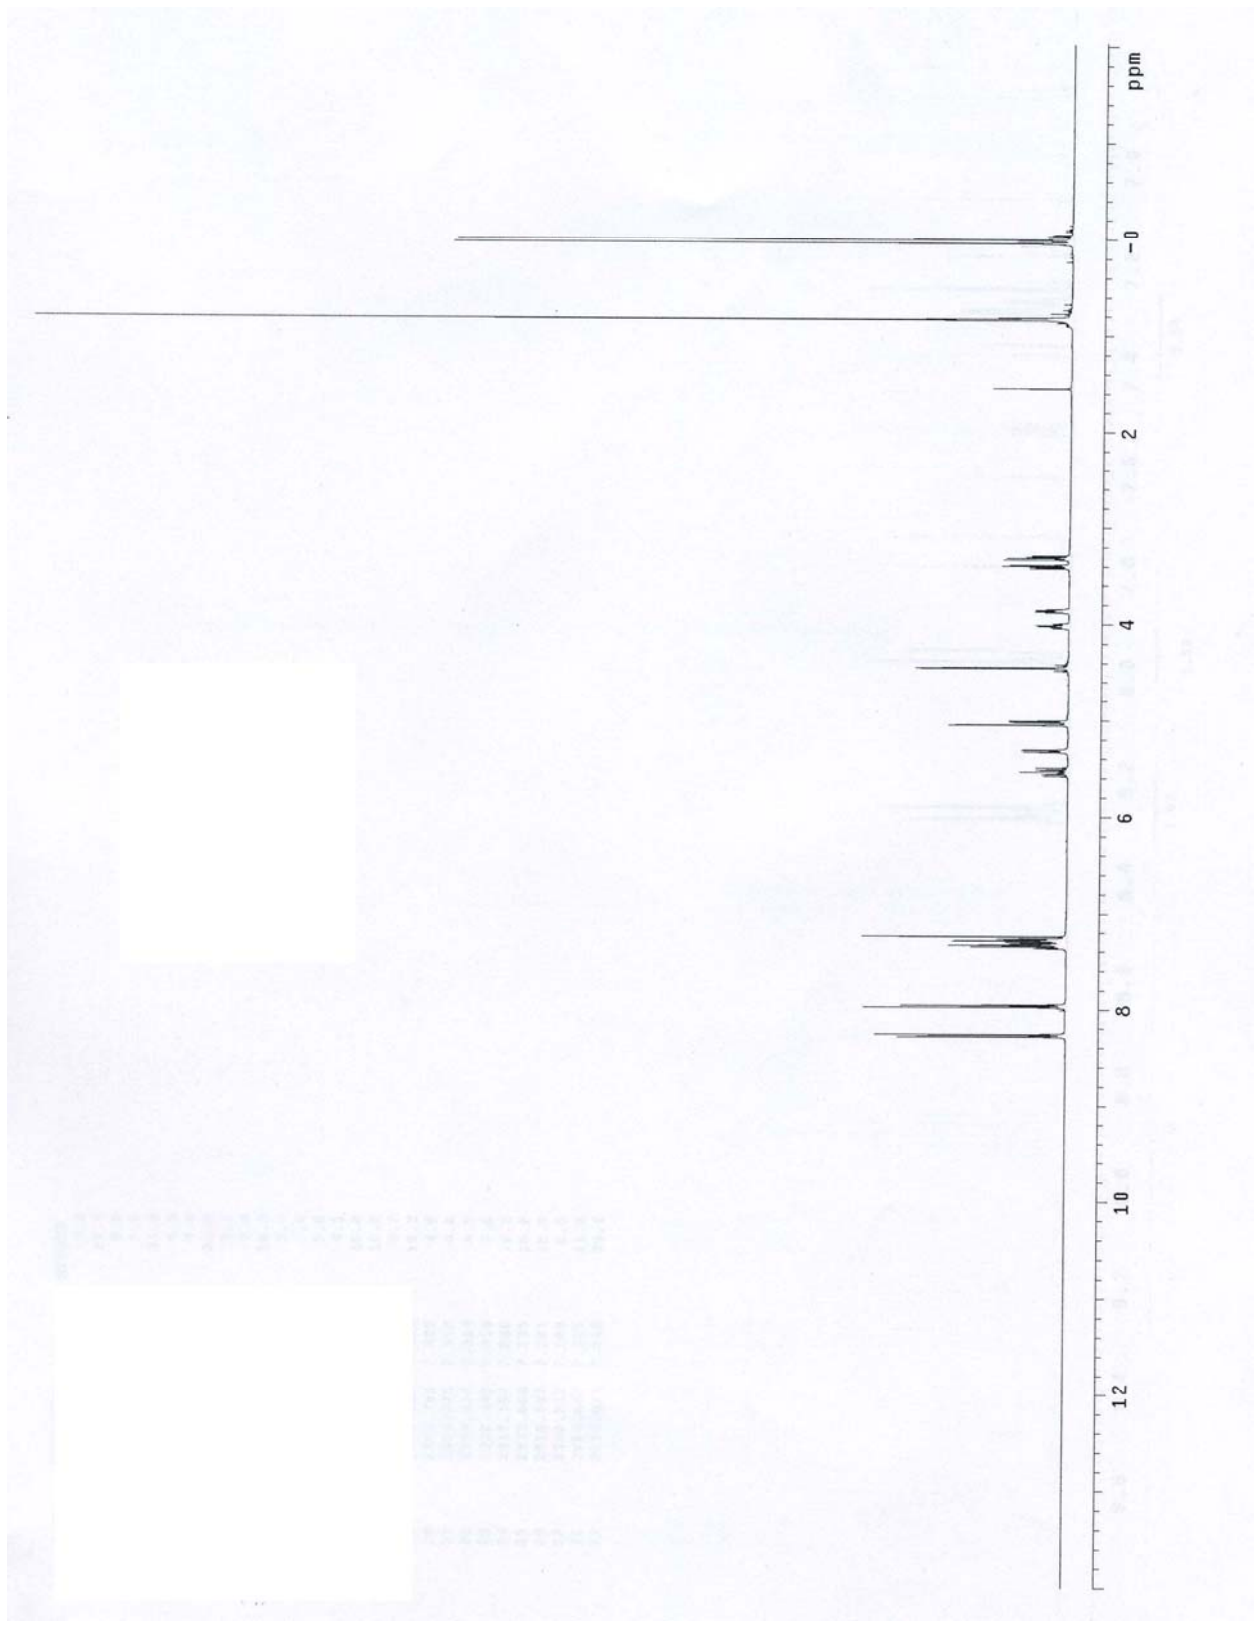

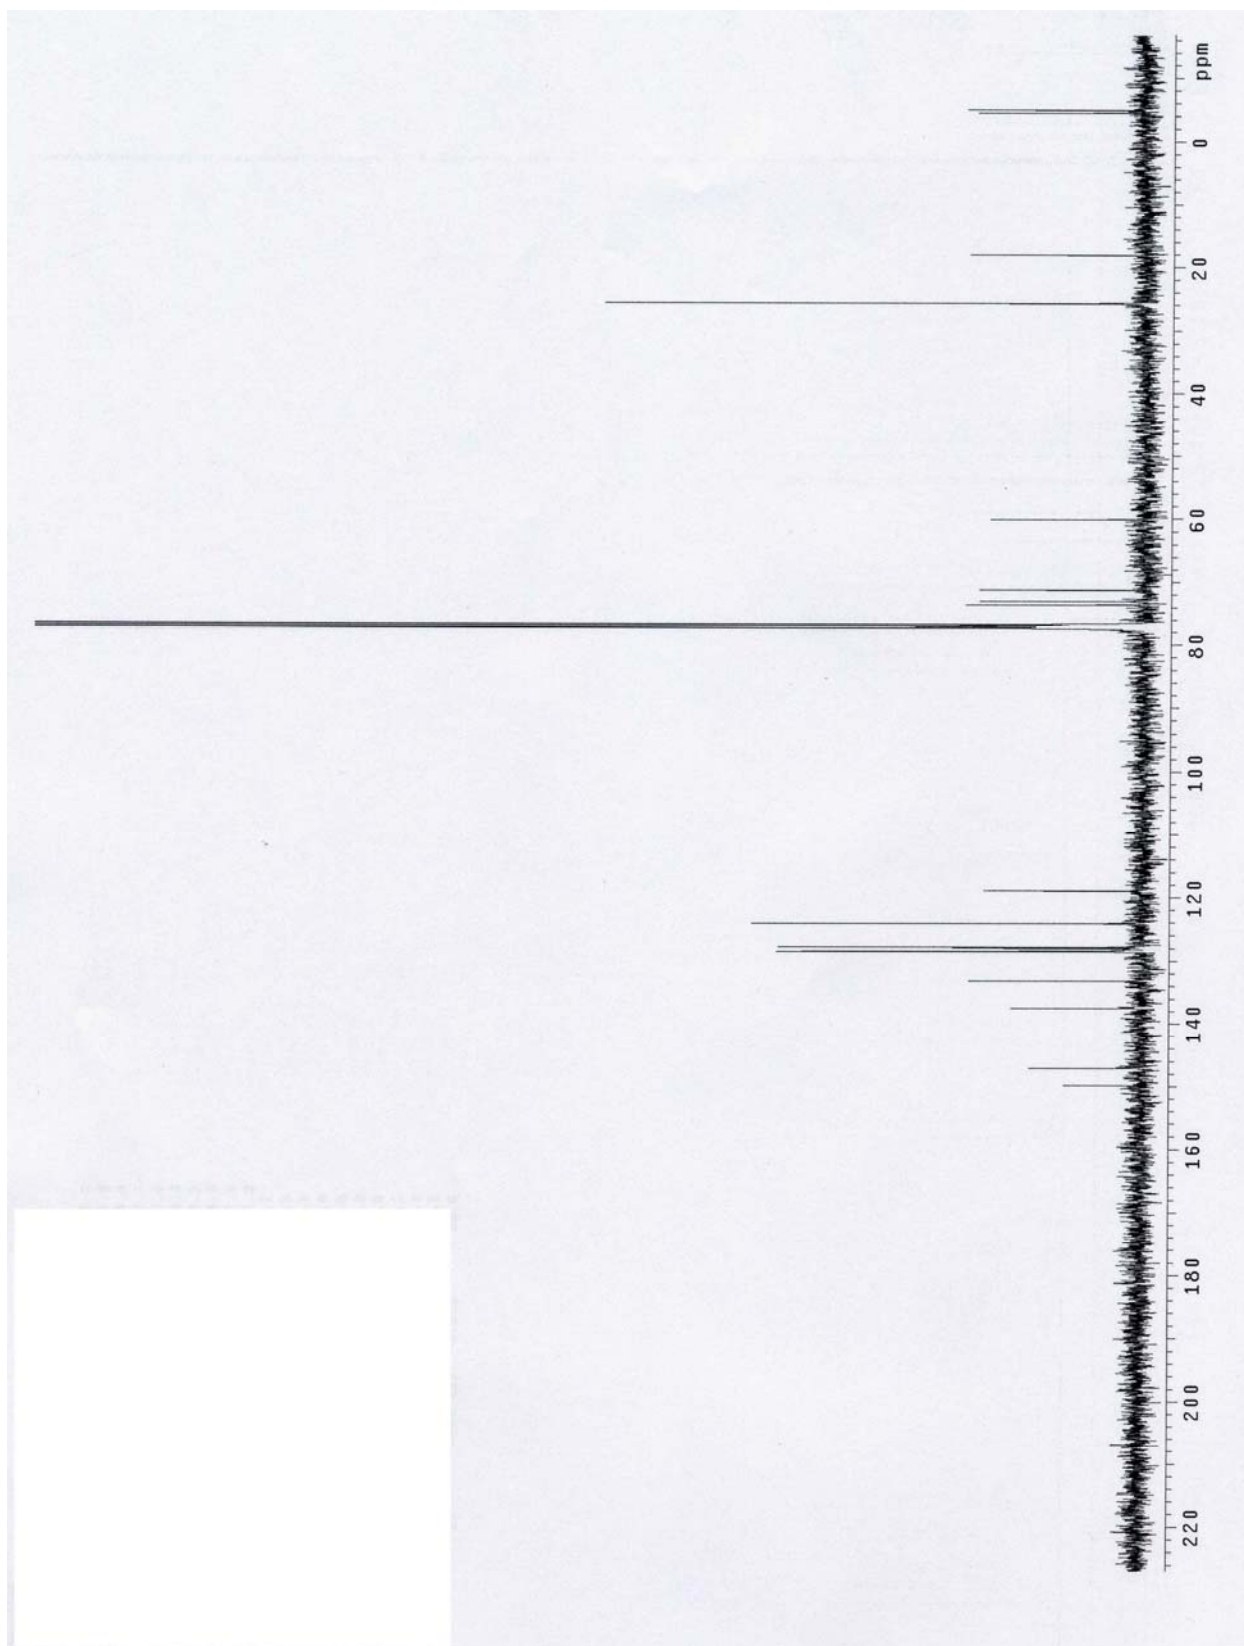

***tert*-Butyl 5-(benzyloxy)-4-(*tert*-butyldimethylsilyloxy)pent-1-en-3-ylcarbamate (4a)**

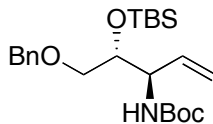

To a stirred solution of compound **5** (0.400 g, 0.8 mmol, 100 mol%) in dry MeCN (0.15 M with respect to **5**) under nitrogen at 25 °C was added thiophenol (0.286 ml, 2.8 mmol, 350 mol%) followed by addition of Cs<sub>2</sub>CO<sub>3</sub> (1.04 g, 3.2 mmol, 400 mol%). The mixture heated at 50 °C and was allowed to stir until complete consumption of **5** was observed, as determined by TLC analysis. The solution was allowed to cool to ambient temperature, at which point Boc<sub>2</sub>O (0.209 g, 0.96 mmol, 120 mol%) was added in one portion. After 1 hour another portion of Boc<sub>2</sub>O (0.174 g, 0.8 mmol, 100 mol%) was added and the reaction mixture was allowed to stir for 2 hours at ambient temperature. Saturated NH<sub>4</sub>Cl (aq.) was added dropwise and the mixture was transferred to a separatory funnel. The organic layer was separated and the aqueous layer was extracted three times with EtOAc. The combined organic layers were dried (Mg<sub>2</sub>SO<sub>4</sub>), filtered and the filtrate was concentrated *in vacuo*. The residue was purified by flash column chromatography (SiO<sub>2</sub>: 5% EtOAc/hexanes) to furnish the title compound (0.269 g) as yellow oil in 79% yield.

**<sup>1</sup>H NMR** (400 MHz, CDCl<sub>3</sub>): δ 7.29 – 7.21 (m, 5H), 5.71 (ddd, *J* = 17.2, 10.2, 7.0 Hz, 1H), 5.17 (d, *J* = 17.2 Hz, 1H), 5.11 (d, *J* = 10.2 Hz, 1H), 4.95 (m, 1H), 4.45 (s, 1H), 4.44 (s, 1H), 4.21 – 4.14 (m, 1H), 3.93 – 3.89 (m, 1H), 3.37 – 3.30 (m, 2H), 1.39 (s, 9H), 0.84 (s, 9H), 0.03 (s, 3H), 0.00 (s, 3H).

**<sup>13</sup>C NMR** (100 MHz, CDCl<sub>3</sub>): δ 155.2, 138.6, 132.2, 128.3, 127.6, 127.6, 117.3, 73.2, 4, 72.8, 72.1, 56.0, 28.4, 25.8, -4.4, -5.0.

**HRMS** (CI): Calcd. for C<sub>23</sub>H<sub>40</sub>NO<sub>4</sub>Si (M+1): 422.2727, Found: 422.2729

**FTIR** (neat): 2929, 2857, 2359, 1716, 1495, 1365, 1168, 1004 cm<sup>-1</sup>.

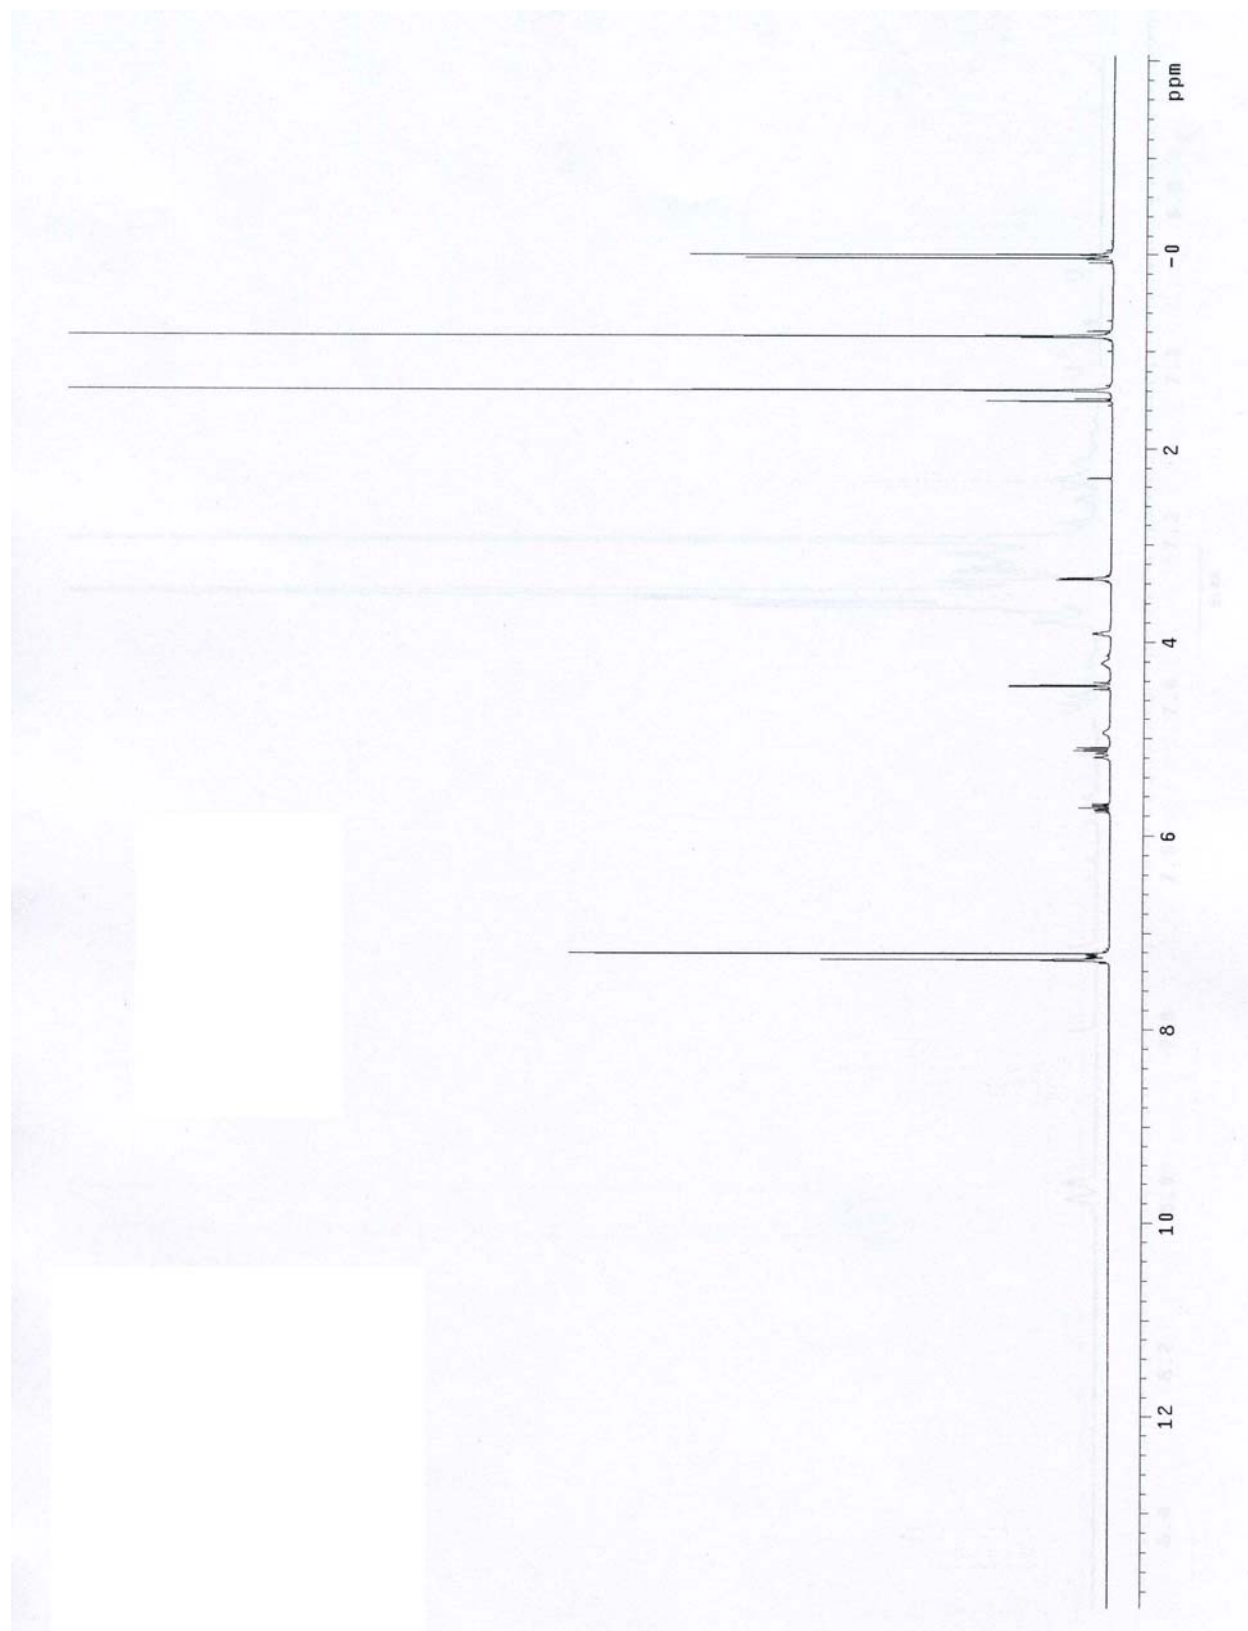

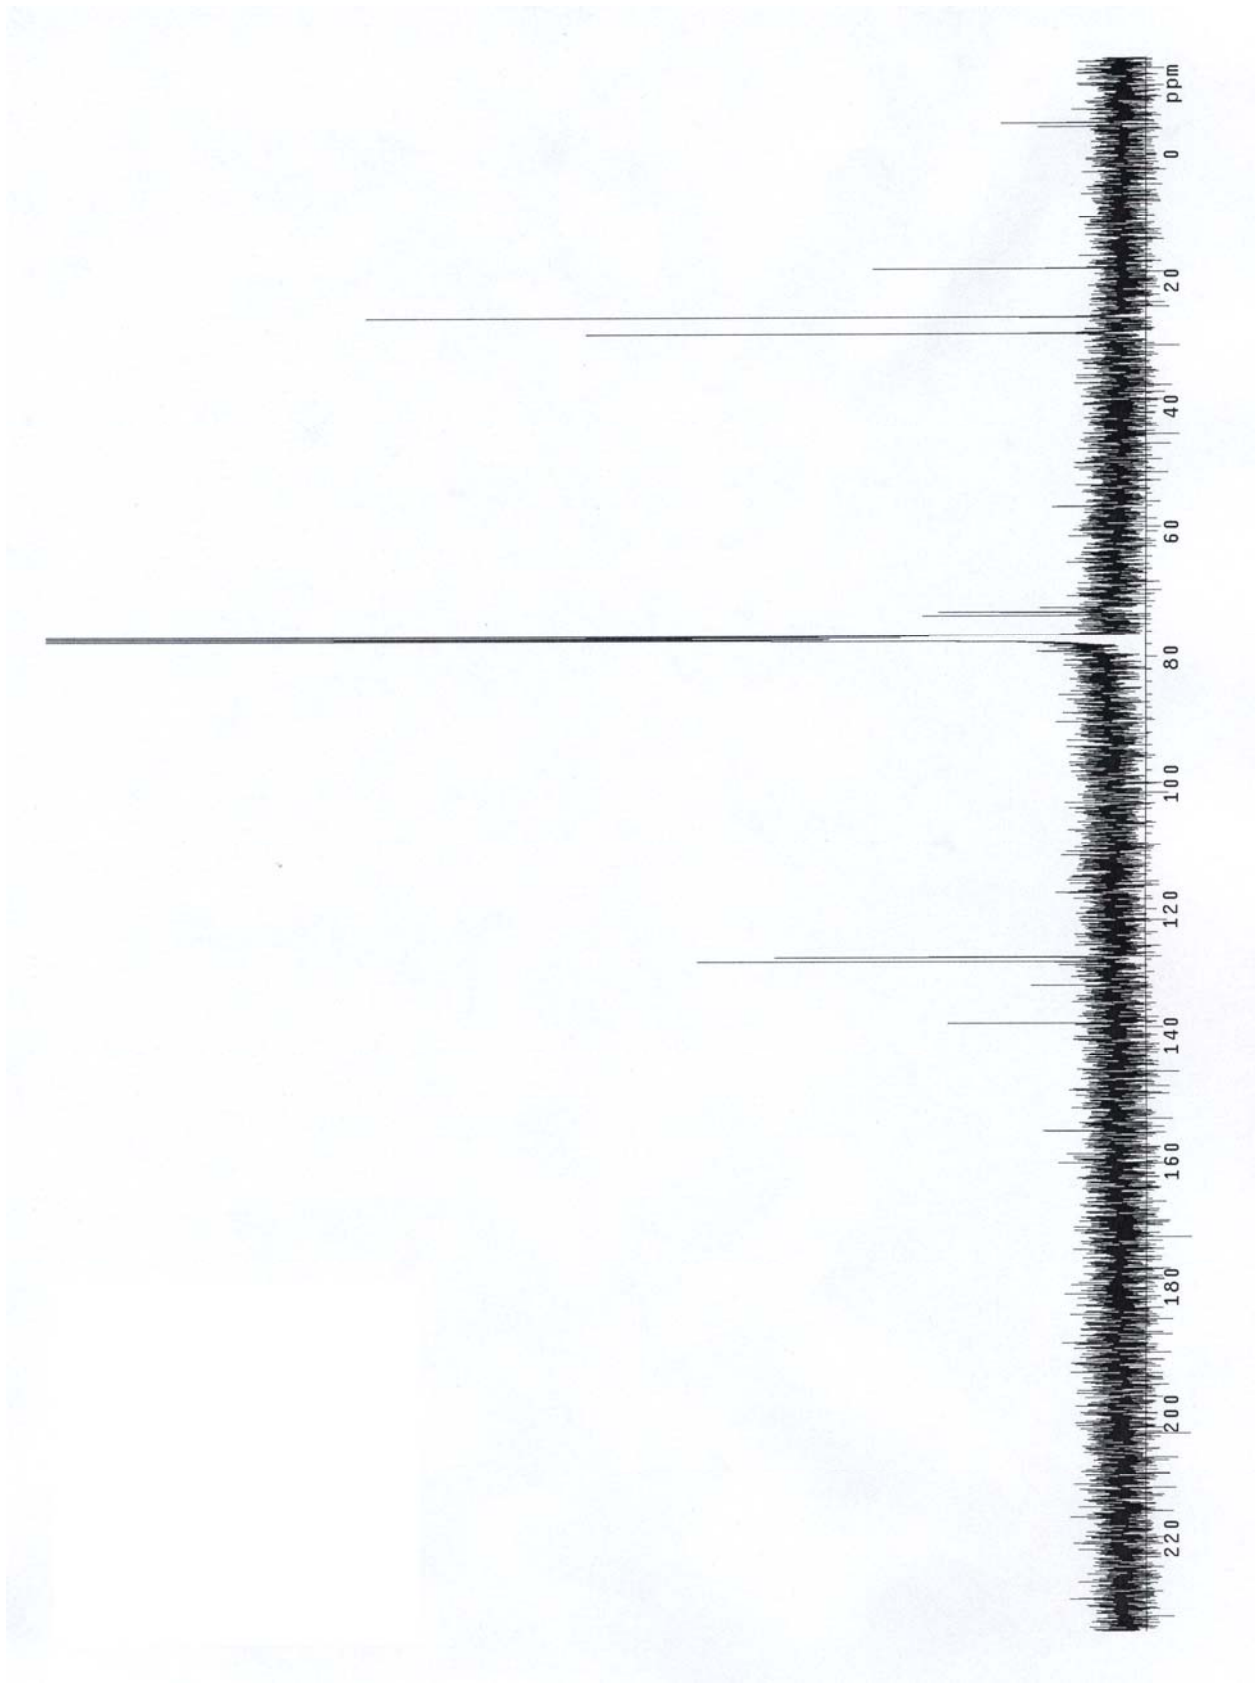

**(E)-Methyl 6-(benzyloxy)-4-(tert-butoxycarbonylamino)-5-(tert-butyldimethylsilyloxy)hex-2-enoate (4c)**

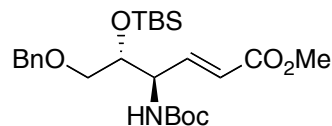

To a stirred solution of compound **4a** (50 mg, 0.12 mmol, 100 mol%) in dry DCM (0.1 M with respect to **4a**) under nitrogen at 25 °C was added methyl acrylate (49  $\mu$ l, 0.54 mmol, 450 mol%). The reaction mixture heated at 40 °C and the Grubbs-Hoveyda II catalyst (3.7 mg, 0.006 mmol, 5 mol%) was added in a single portion. The reaction mixture was stirred until the complete consumption of **4a** was observed, as determined by TLC analysis. The reaction mixture was concentrated *in vacuo* and purified by flash column chromatography (SiO<sub>2</sub>: 10% EtOAc/hexanes) to furnish the title compound (52 mg) as yellow oil in 91% yield as a 20:1 ratio of *E/Z* olefin isomers.

**<sup>1</sup>H NMR** (400 MHz, CDCl<sub>3</sub>):  $\delta$  7.36 -7.27 (m, 5H), 6.86 (dd, *J* = 15.8, 6.4 Hz, 1H), 5.98 (d, *J* = 15.8 Hz, 1H), 5.09 (d, *J* = 8.2 Hz, 1H), 4.49 (s, 2H), 3.98 – 3.94 (m, 1H), 3.73 (s, 3H), 3.45 – 3.56 (m, 2H), 1.43 (s, 9H), 0.88 (s, 9H), 0.08 (s, 3H), 0.05 (s, 3H).

**<sup>13</sup>C NMR** (100 MHz, CDCl<sub>3</sub>):  $\delta$  166.6, 155.0, 144.4, 137.7, 128.4, 127.7, 122.5, 79.6, 73.5, 72.7, 71.8, 54.6, 51.6, 28.3, 25.7, 18.1, -4.5, -5.1.

**HRMS** (CI): Calcd. for C<sub>25</sub>H<sub>42</sub>NO<sub>6</sub>Si (M+1): 480.2781, Found: 480.2781

**FTIR** (neat): 2929, 2360, 1709, 1496, 1366, 1253, 1165, 907 cm<sup>-1</sup>.



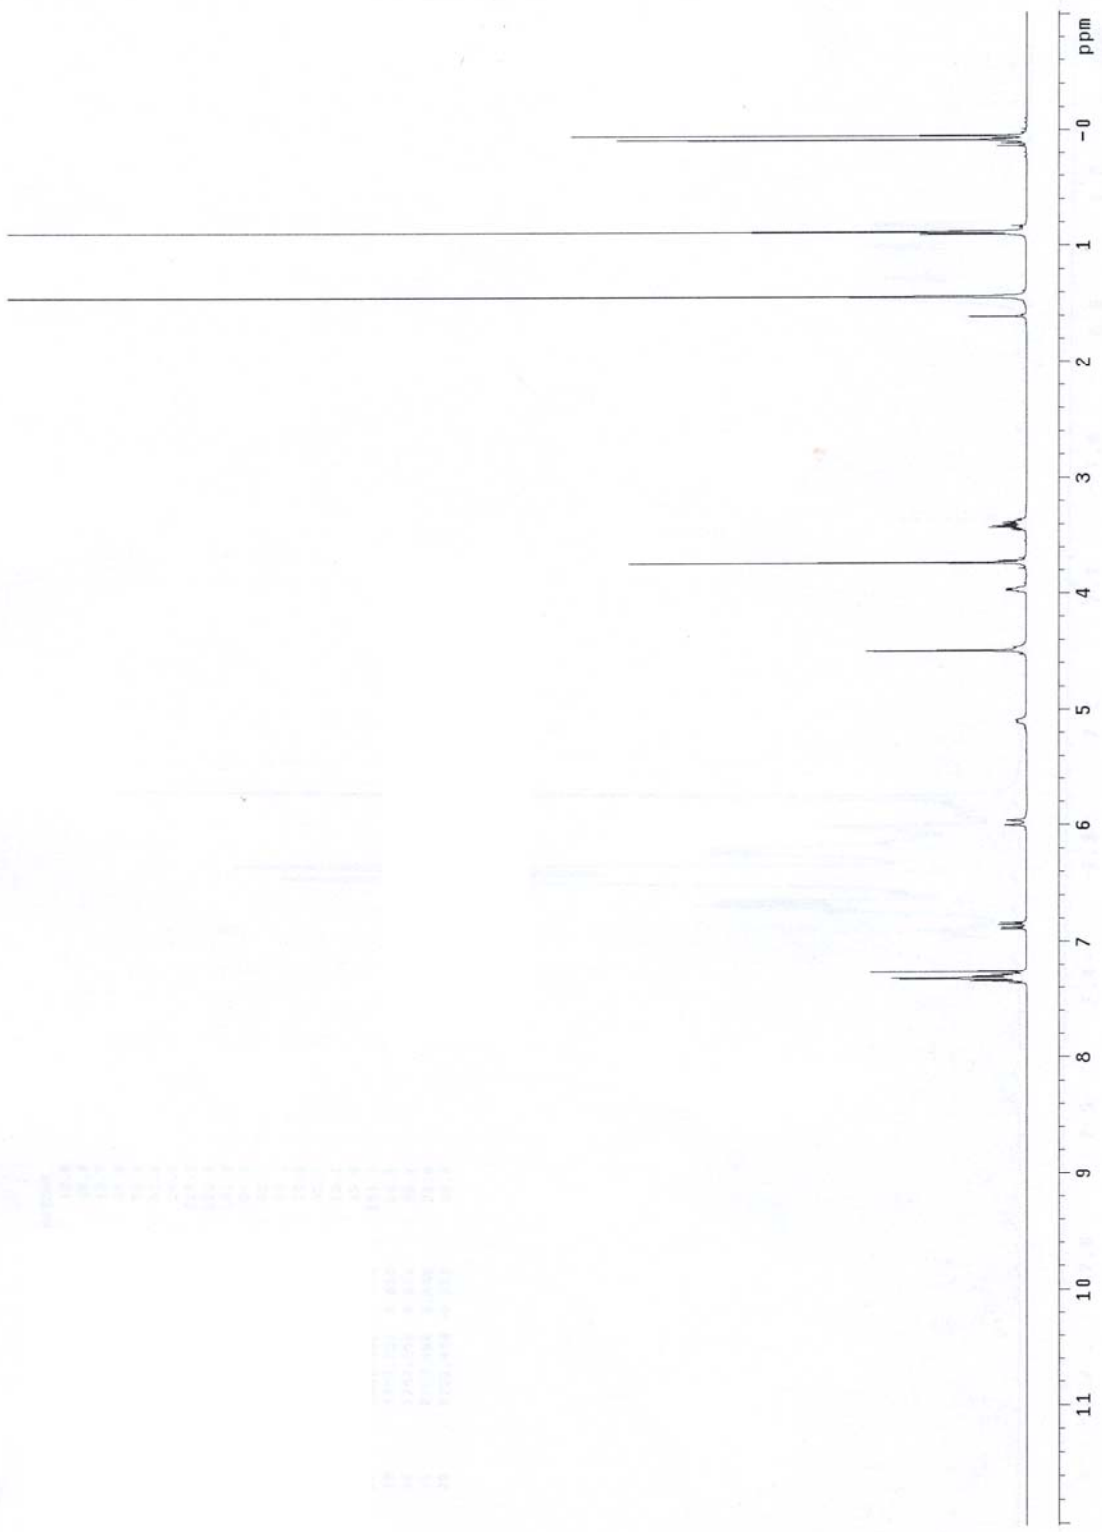

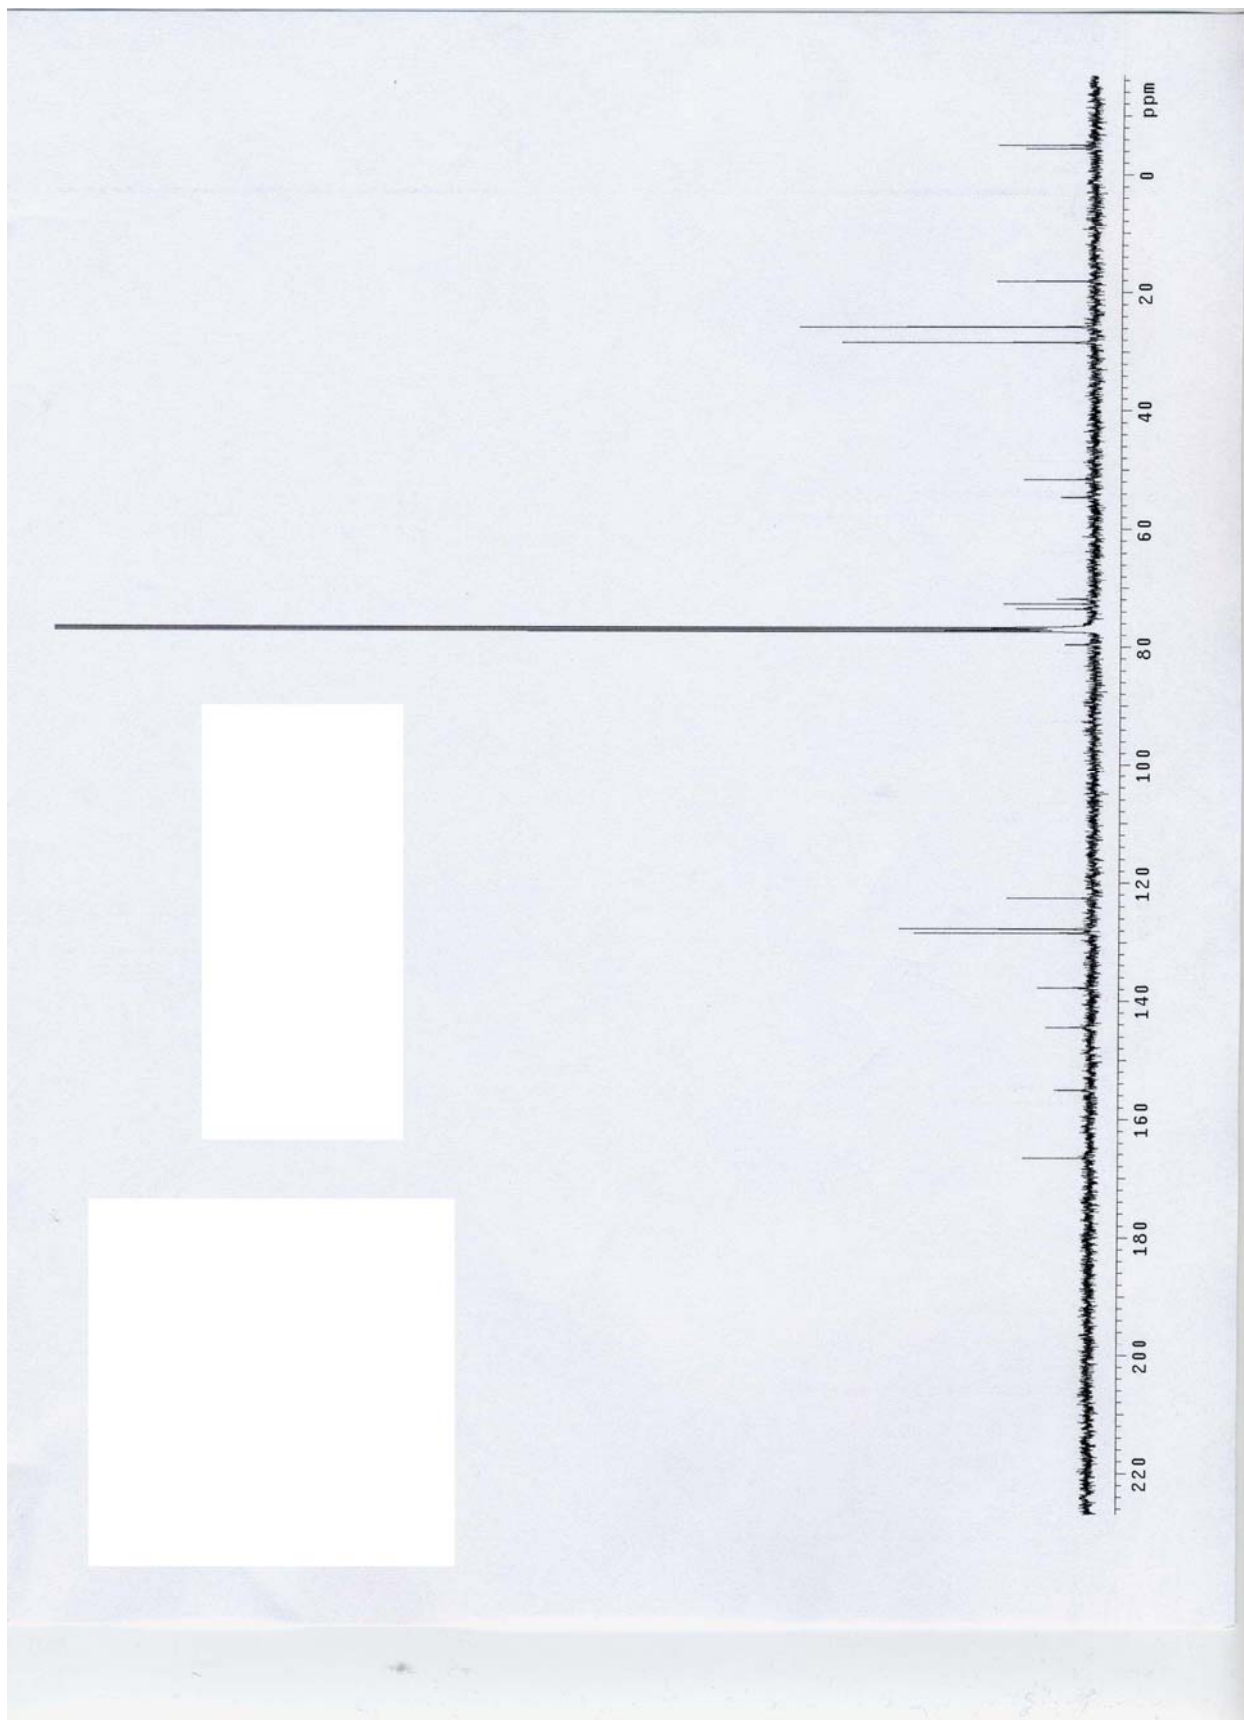

**Methyl 4-(benzyloxy)-2-(*tert*-butoxycarbonylamino)-3-(*tert*-butyl dimethyl silyloxy)butanoate (4b)**

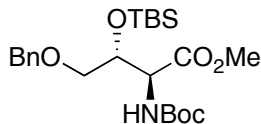

To a stirred solution of compound **4a** (50 mg, 0.12 mmol, 100 mol%) in MeCN:CCl<sub>4</sub>:H<sub>2</sub>O (1:1:1.5, 0.1 M with respect to **4a**) was added NaIO<sub>4</sub> (128 mg, 0.6 mmol, 500 mol%) followed by RuCl<sub>3</sub>·6H<sub>2</sub>O (1.6 mg, 0.006 mmol, 5 mol%). The reaction mixture was allowed to stir until complete consumption of **4a** was observed, as determined by TLC analysis. The reaction mixture was diluted with DCM, filtered through celite and transferred to a separatory funnel. The organic layer was separated and the aqueous layer was extracted three times with DCM. The combined organic layers were dried (Mg<sub>2</sub>SO<sub>4</sub>), filtered and the filtrate was concentrated *in vacuo*. The residue was dissolved in CHCl<sub>3</sub>:MeOH (2:1, 0.2 M with respect to **4a**) and 2M solution of TMSCH<sub>2</sub>N<sub>2</sub> in ether (240 μl, 0.24 mmol, 200 mol%) was added. After conversion to the methyl ester was complete, as determined by TLC analysis, the reaction mixture was concentrated *in vacuo* and the residue was purified by flash column chromatography (SiO<sub>2</sub>, 10% EtOAc/hexanes) to furnish the title compound (36 mg) as yellow oil in 67% yield over two steps.

**<sup>1</sup>H NMR** (400 MHz, CDCl<sub>3</sub>): δ 7.34 -7.27 (m, 5H), 5.38 (d, *J* = 8.0 Hz, 1H), 4.56 -4.47 (m, 3H), 4.19 - 4.18(m, 1H), 3.67 (s, 3H), 3.56 (dd, *J* = 6.0, 4.0 Hz, 1H), 3.46 (dd, *J* = 5.6, 4.0 Hz, 1H), 1.44 (s, 9H), 0.85 (s, 9H), 0.07 (s, 3H), 0.04 (s, 3).

**<sup>13</sup>C NMR** (100 MHz, CDCl<sub>3</sub>): δ 170.5, 155.1, 137.9, 128.3, 127.7, 127.6, 79.7, 73.4, 72.3, 71.7, 56.8, 28.3, 25.6, 18.0, -4.6, -5.1

**HRMS** (CI): Calcd. for C<sub>23</sub>H<sub>40</sub>NO<sub>6</sub>Si (M+1): 454.2625, Found: 454.2625.

**FTIR** (neat): 2930, 2359, 1709, 1497, 1367, 1164, 906 cm<sup>-1</sup>.

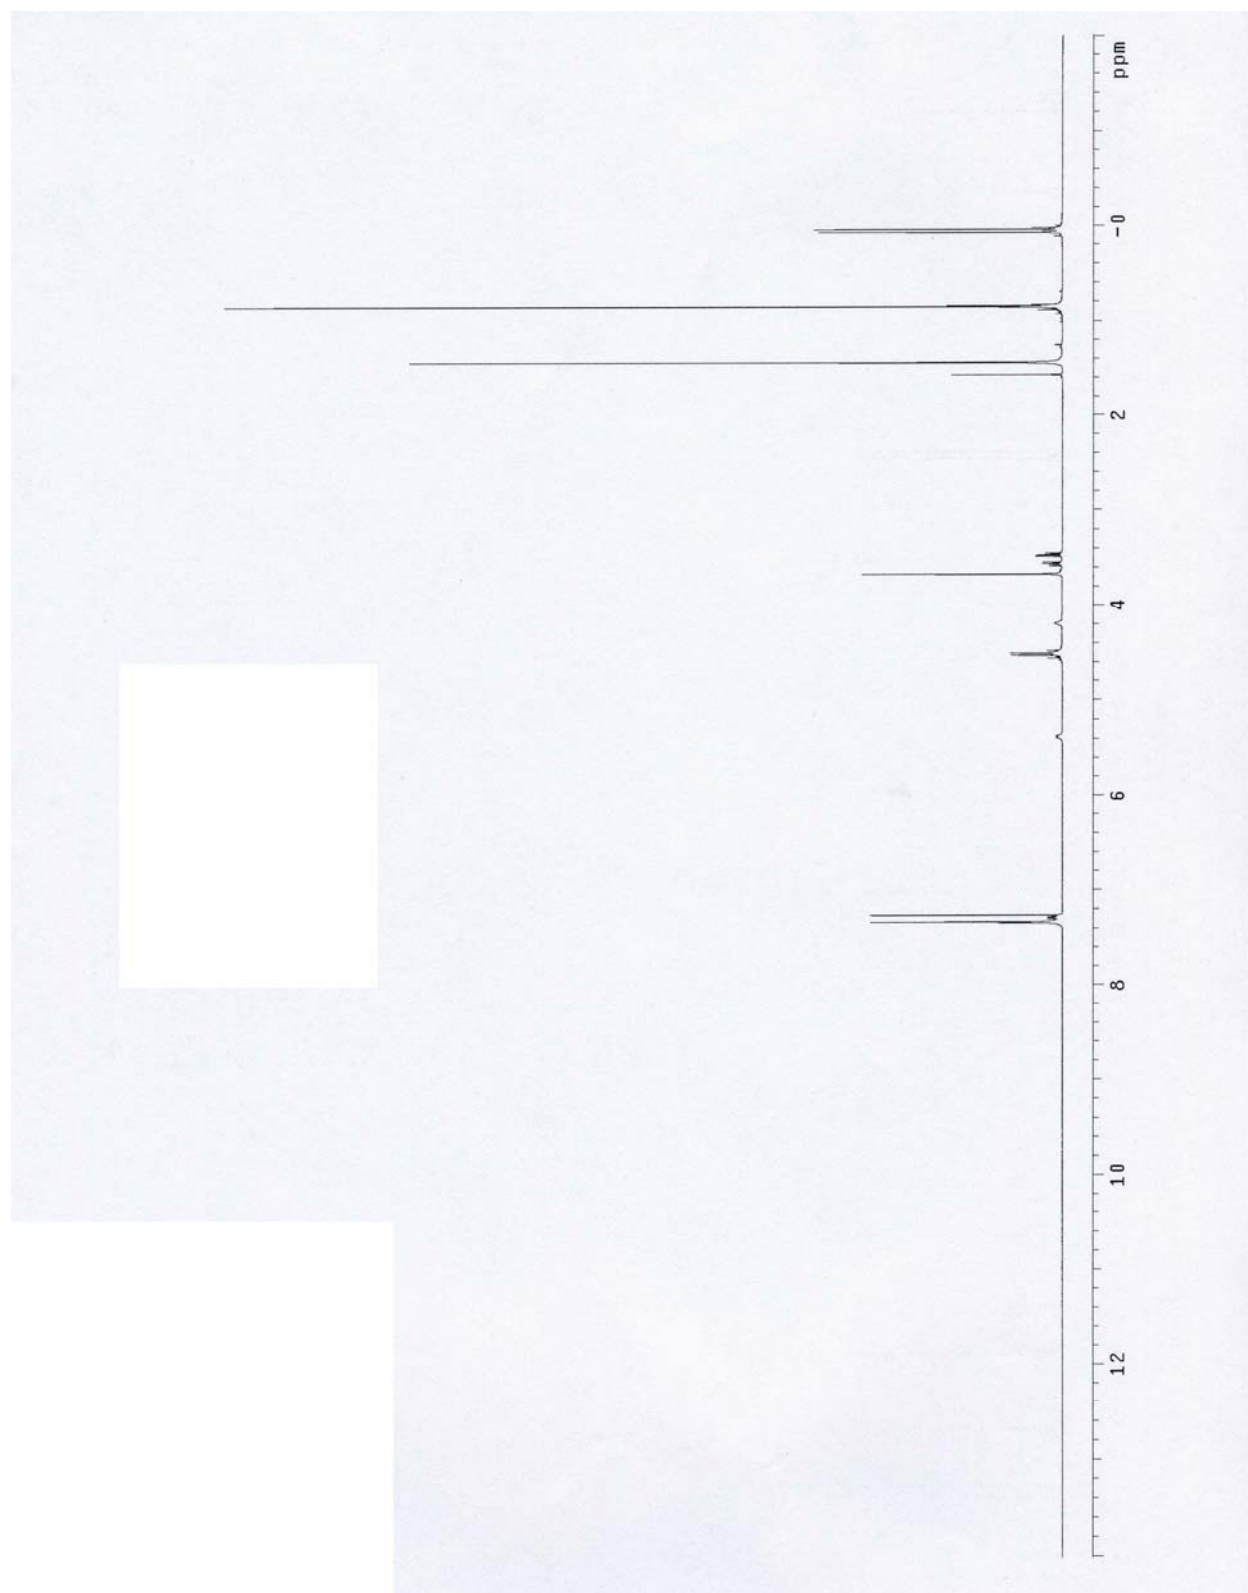

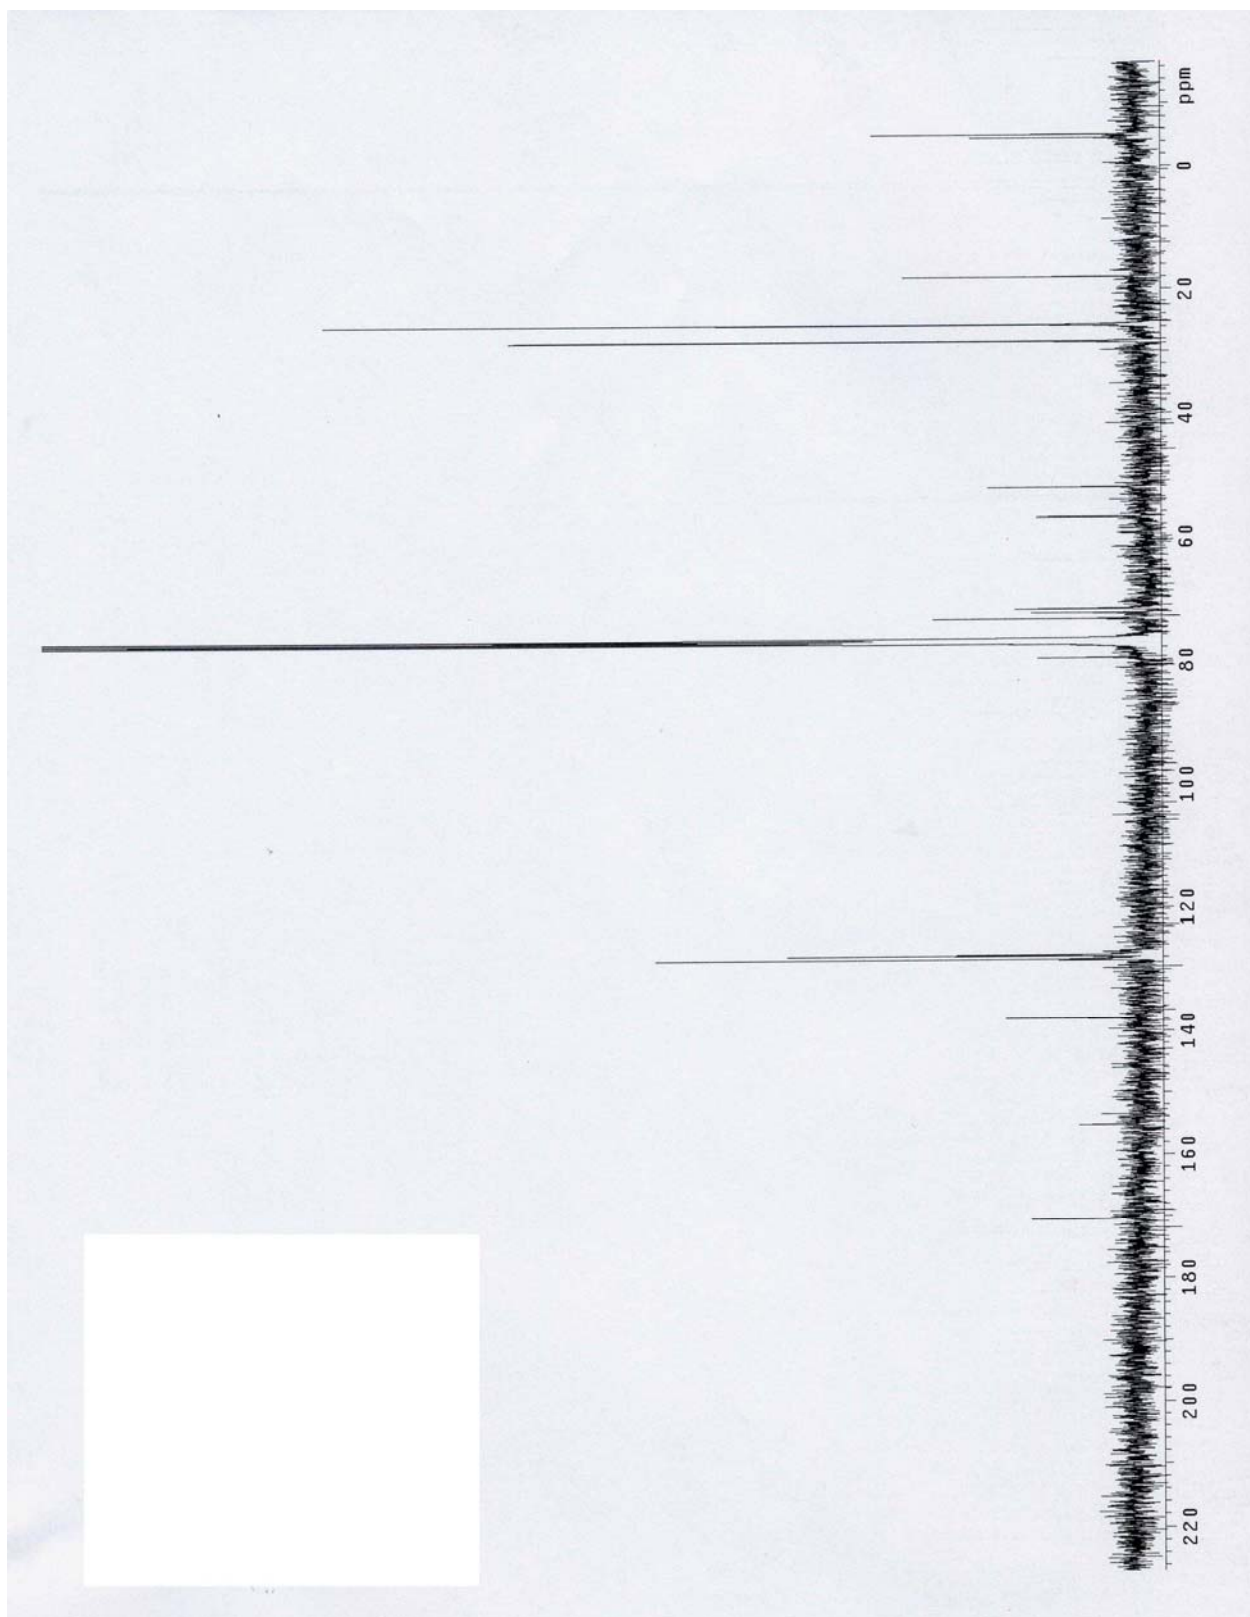

## Deuterium Labeling (*deuterio-3a*)

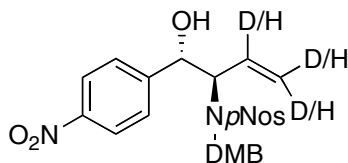

The same procedure used for the preparation of **3a** was used for the preparation of *deuterio-3a*, withstanding the substitution of *d*<sub>8</sub>-isopropanol for isopropanol.

**<sup>1</sup>H NMR** (400 MHz, CDCl<sub>3</sub>): δ 8.25 (d, *J* = 9.0 Hz, 2H), 8.11 (d, *J* = 8.8 Hz, 2H), 7.85 (d, *J* = 9.0 Hz, 2H), 7.37 (d, *J* = 8.8 Hz, 2H), 7.13 (d, *J* = 8.4 Hz, 1H), 6.39 (dd, *J* = 8.4, 2.4 Hz, 1H), 6.30 (d, *J* = 2.4 Hz, 1H), 6.09 – 6.01 (m, 0.71H), 5.20 – 5.16 (m, 1.93H), 4.95 – 4.90 (m, 0.91H), 4.32 (d, *J* = 14.7 Hz, 1H), 4.25 – 4.24 (m, 1H), 4.25 (d, *J* = 14.7 Hz, 1H), 3.79 (s, 3H), 3.69 (s, 3H), 2.89 (s, 1H).

**<sup>2</sup>H NMR** (77 MHz, CHCl<sub>3</sub>): δ 6.09 (s, 0.29 <sup>2</sup>H), 5.22 (s, 0.07 <sup>2</sup>H), 4.97 (s, 0.09 <sup>2</sup>H).

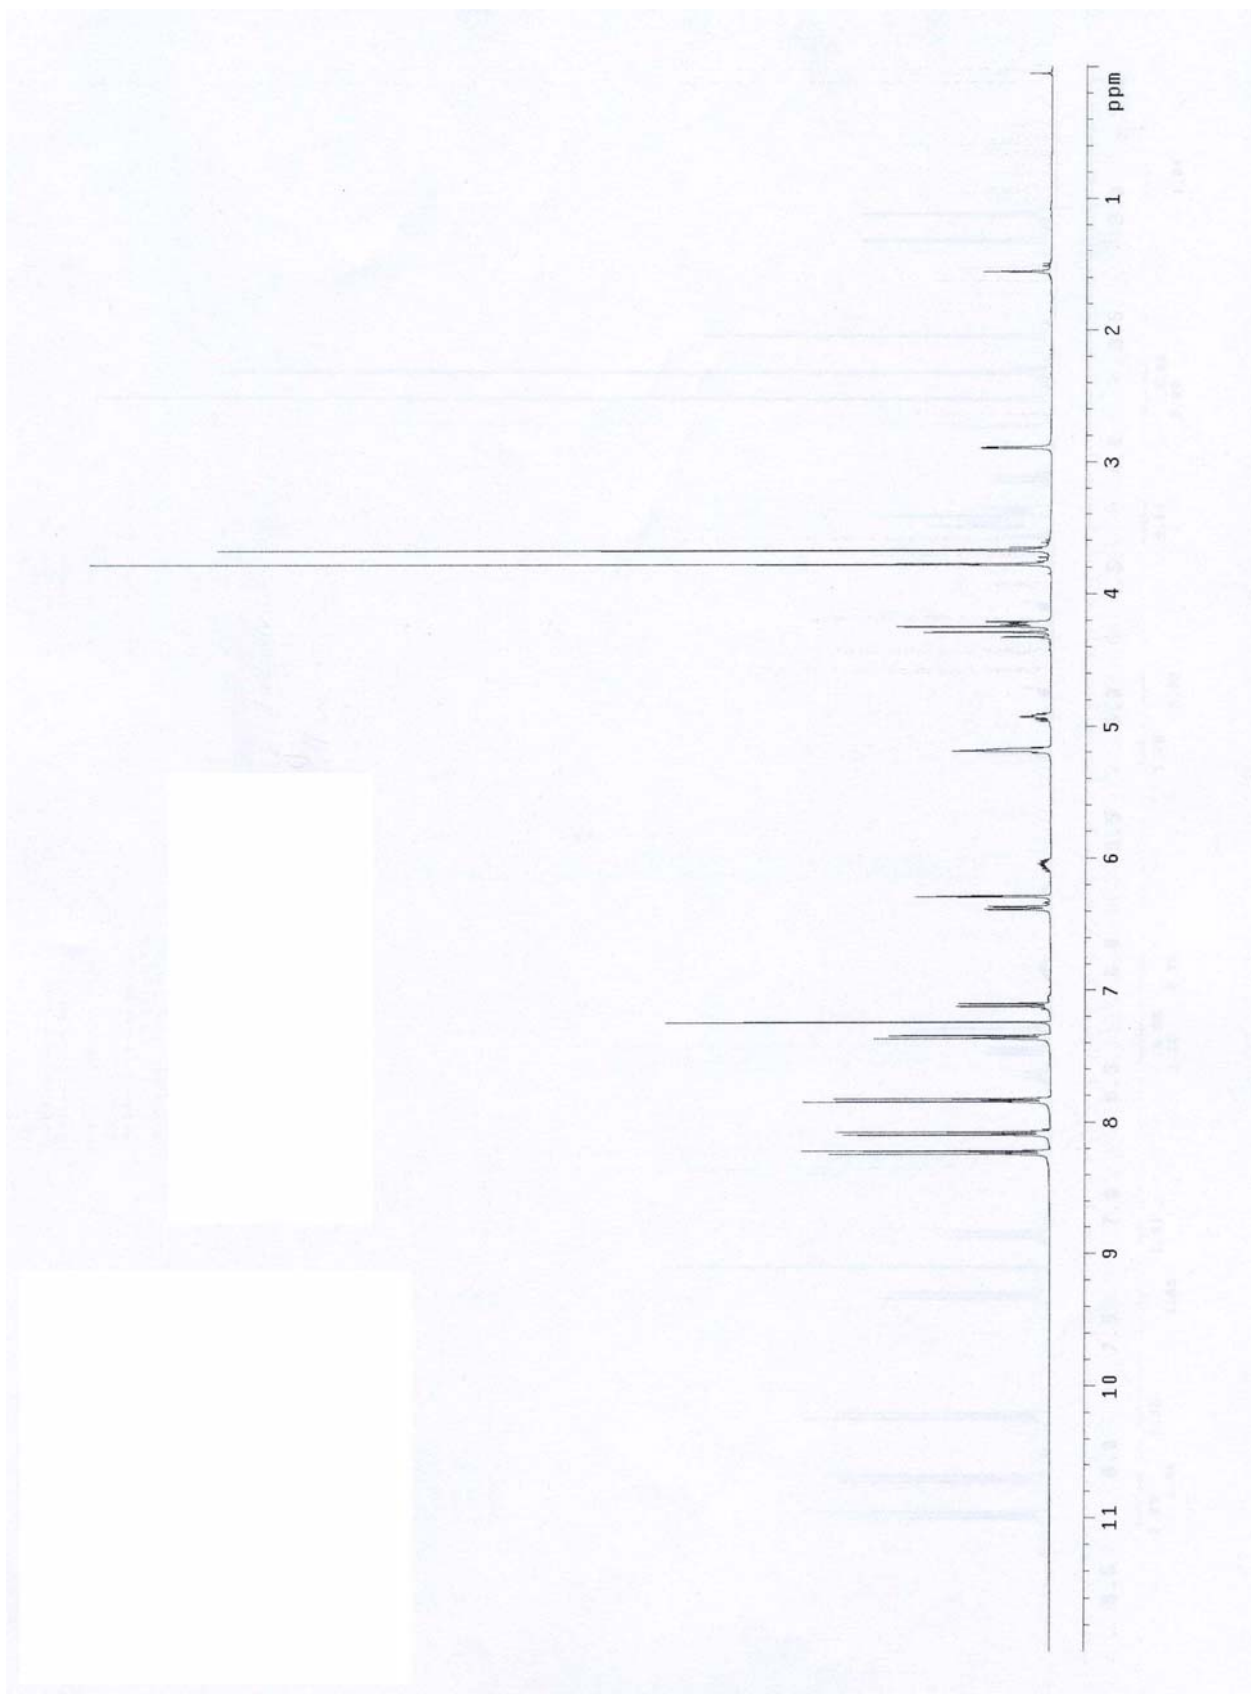

500 MHz nmr0

es-7-60-1

expl s2pu1

```
SAMPLE          DEC. & VT
date    Dec 18 2008    dfrq    499.867
solvent  CDCl3        h1      37
file    ACQUISITION  exp     0
sfrq    76.733       dm      nnn
tn      1.341        dmm     10582
at      4280         dseq    1.0
sw      1596.3       dres    1.0
fb      1000         homo    27.0
ts      58           temp    PROCESSING
pw      12.0         lb      1.00
d1      2.000        wf file
tof     118.3       proc   not used
ct      512         fn      f
alock   gain        n
gain    40          werr   wft
l1      n           wexp   n
l2      n           wds    n
dp      y           wht    y
hs      nm          DISPLAY
sp      -38.4       wp      805.6
vs      112521     vs      0
sc      250        sc      0
wcmm    3.20       wcmm    37542.66
l1mm    1125.5     rfl     555.5
rff     555.5     th      68
ins     100.000    a1      cdc
ph
```

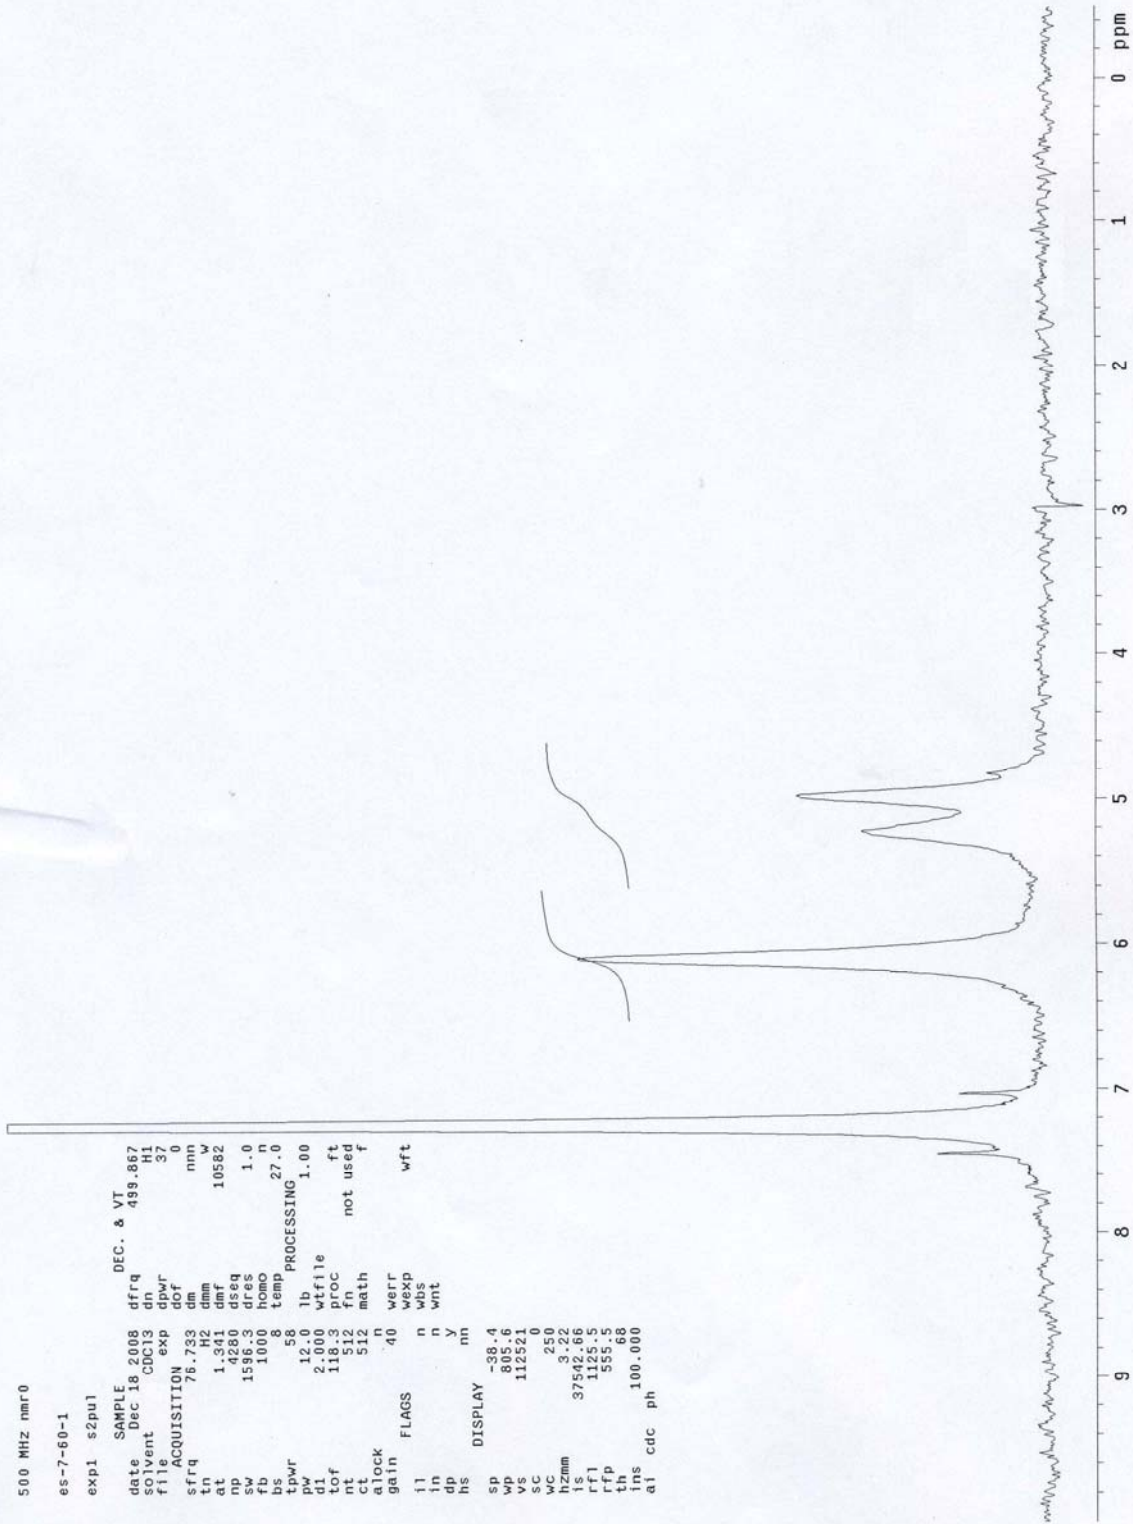



## X-Ray Crystallographic Data for **3a**

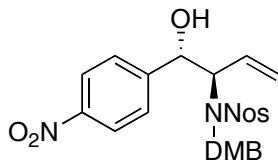

X-ray Experimental.

Table 1. Crystallographic Data for **3a**.

Table 2. Fractional coordinates and equivalent isotropic thermal parameters ( $\text{\AA}^2$ ) for the non-hydrogen atoms of **3a**.

Table 3. Bond Lengths ( $\text{\AA}$ ) and Angles ( $^\circ$ ) for the non-hydrogen atoms of **3a**.

Table 4. Anisotropic thermal parameters for the non-hydrogen atoms of **3a**.

Table 5. Fractional coordinates and isotropic thermal parameters ( $\text{\AA}^2$ ) for the hydrogen atoms of **3a**.

Table 6. Torsion Angles ( $^\circ$ ) for the non-hydrogen atoms of **3a**.

Table 7. H-Bond Lengths ( $\text{\AA}$ ) and Angles ( $^\circ$ ) for **3a**.

Figure 1. View of **3a** showing the atom labeling scheme. Displacement ellipsoids are scaled to the 50% probability level.

Figure 1. View of **3a** showing the atom labeling scheme. Displacement ellipsoids are scaled to the 50% probability level.

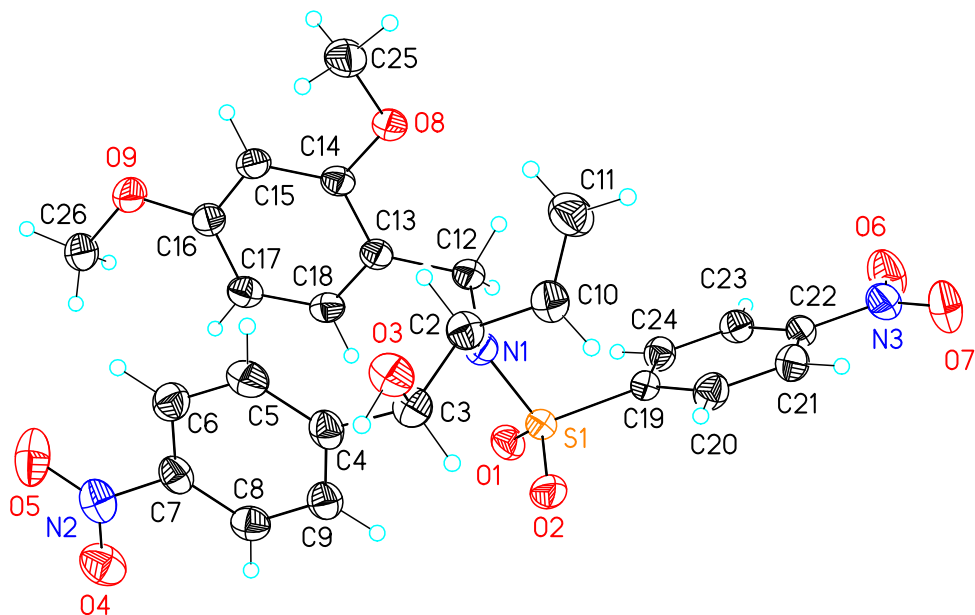

X-ray Experimental for  $C_{25}H_{25}N_3O_9S \cdot CHCl_3$ : Crystals grew as clusters of large colorless prisms by slow evaporation from chloroform. The data crystal was cut from a much larger crystal and had approximate dimensions; 0.25 x 0.20 x 0.15 mm. The data were collected on a Nonius Kappa CCD diffractometer using a graphite monochromator with MoK $\alpha$  radiation ( $\lambda = 0.71073 \text{ \AA}$ ). A total of 215 frames of data were collected using  $\omega$ -scans with a scan range of  $2^\circ$  and a counting time of 56 seconds per frame. The data were collected at 153 K using an Oxford Cryostream low temperature device. Details of crystal data, data collection and structure refinement are listed in Table 1. Data reduction were performed using DENZO-SMN.<sup>1</sup> The structure was solved by direct methods using SIR97<sup>2</sup> and refined by full-matrix least-squares on  $F^2$  with anisotropic displacement parameters for the non-H atoms using SHELXL-97.<sup>3</sup> The hydrogen atoms on carbon were calculated in ideal positions with isotropic displacement parameters set to 1.2 $\times$ U $_{eq}$  of the attached atom (1.5 $\times$ U $_{eq}$  for methyl hydrogen atoms). The

hydroxyl group hydrogen atom, H3O, was observed in a  $\Delta F$  map and refined with isotropic displacement parameters. The function,  $\Sigma w(|F_o|^2 - |F_c|^2)^2$ , was minimized, where  $w = 1/[(s(F_o))^2 + (0.0421*P)^2 + (3.3612*P)]$  and  $P = (|F_o|^2 + 2|F_c|^2)/3$ .  $R_w(F^2)$  refined to 0.132, with  $R(F)$  equal to 0.0545 and a goodness of fit,  $S$ , = 1.06. Definitions used for calculating  $R(F)$ ,  $R_w(F^2)$  and the goodness of fit,  $S$ , are given below.<sup>4</sup> The data were checked for secondary extinction but no correction was necessary. Neutral atom scattering factors and values used to calculate the linear absorption coefficient are from the International Tables for X-ray Crystallography (1992).<sup>5</sup> All figures were generated using SHELXTL/PC.<sup>6</sup> Tables of positional and thermal parameters, bond lengths and angles, torsion angles, H-bonding interactions, figures and lists of observed and calculated structure factors are located in tables 1 through 8.

### **References**

- 1) DENZO-SMN. (1997). Z. Otwinowski and W. Minor, *Methods in Enzymology*, **276**: Macromolecular Crystallography, part A, 307 – 326, C. W. Carter, Jr. and R. M. Sweets, Editors, Academic Press.
- 2) SIR97. (1999). A program for crystal structure solution. Altomare A., Burla M.C., Camalli M., Cascarano G.L., Giacovazzo C., Guagliardi A., Moliterni A.G.G., Polidori G., Spagna R. *J. Appl. Cryst.* 32, 115-119.
- 3) Sheldrick, G. M. (1994). SHELXL97. Program for the Refinement of Crystal Structures. University of Gottingen, Germany.
- 4)  $R_w(F^2) = \{ \Sigma w(|F_o|^2 - |F_c|^2)^2 / \Sigma w(|F_o|^4) \}^{1/2}$  where  $w$  is the weight given each reflection.  
 $R(F) = S(|F_o| - |F_c|) / S|F_o|$  for reflections with  $F_o > 4(s(F_o))$ .  
 $S = [ \Sigma w(|F_o|^2 - |F_c|^2)^2 / (n - p) ]^{1/2}$ , where  $n$  is the number of reflections and  $p$  is the number of refined parameters.
- 5) International Tables for X-ray Crystallography (1992). Vol. C, Tables 4.2.6.8 and 6.1.1.4, A. J. C. Wilson, editor, Boston: Kluwer Academic Press.
- 6) Sheldrick, G. M. (1994). SHELXTL/PC (Version 5.03). Siemens Analytical X-ray Instruments, Inc., Madison, Wisconsin, USA.

Table 1. Crystal data and structure refinement for 3a.

|                                   |                                                                                 |                  |
|-----------------------------------|---------------------------------------------------------------------------------|------------------|
| Empirical formula                 | C <sub>26</sub> H <sub>26</sub> Cl <sub>3</sub> N <sub>3</sub> O <sub>9</sub> S |                  |
| Formula weight                    | 662.91                                                                          |                  |
| Temperature                       | 153(2) K                                                                        |                  |
| Wavelength                        | 0.71069 Å                                                                       |                  |
| Crystal system                    | Monoclinic                                                                      |                  |
| Space group                       | P2 <sub>1</sub> /c                                                              |                  |
| Unit cell dimensions              | a = 18.2859(7) Å                                                                | a = 90°.         |
|                                   | b = 11.0179(5) Å                                                                | b = 108.605(2)°. |
|                                   | c = 14.8299(6) Å                                                                | g = 90°.         |
| Volume                            | 2831.7(2) Å <sup>3</sup>                                                        |                  |
| Z                                 | 4                                                                               |                  |
| Density (calculated)              | 1.555 Mg/m <sup>3</sup>                                                         |                  |
| Absorption coefficient            | 0.457 mm <sup>-1</sup>                                                          |                  |
| F(000)                            | 1368                                                                            |                  |
| Crystal size                      | 0.25 x 0.20 x 0.15 mm                                                           |                  |
| Theta range for data collection   | 2.19 to 27.50°.                                                                 |                  |
| Index ranges                      | -23 ≤ h ≤ 23, -12 ≤ k ≤ 14, -19 ≤ l ≤ 19                                        |                  |
| Reflections collected             | 11485                                                                           |                  |
| Independent reflections           | 6469 [R(int) = 0.0301]                                                          |                  |
| Completeness to theta = 27.50°    | 99.6 %                                                                          |                  |
| Absorption correction             | None                                                                            |                  |
| Refinement method                 | Full-matrix least-squares on F <sup>2</sup>                                     |                  |
| Data / restraints / parameters    | 6469 / 0 / 385                                                                  |                  |
| Goodness-of-fit on F <sup>2</sup> | 1.063                                                                           |                  |
| Final R indices [I > 2σ(I)]       | R1 = 0.0545, wR2 = 0.1146                                                       |                  |
| R indices (all data)              | R1 = 0.0988, wR2 = 0.1321                                                       |                  |
| Largest diff. peak and hole       | 0.643 and -0.680 e.Å <sup>-3</sup>                                              |                  |

Table 2. Atomic coordinates ( $\times 10^4$ ) and equivalent isotropic displacement parameters ( $\text{\AA}^2 \times 10^3$ ) for 3a.  $U(\text{eq})$  is defined as one third of the trace of the orthogonalized  $U^{ij}$  tensor.

|     | x        | y       | z       | $U(\text{eq})$ |
|-----|----------|---------|---------|----------------|
| S1  | 7402(1)  | 3809(1) | 6030(1) | 28(1)          |
| O1  | 6679(1)  | 3368(2) | 5414(2) | 36(1)          |
| O2  | 7624(1)  | 3582(2) | 7031(1) | 38(1)          |
| O3  | 7982(1)  | 7145(2) | 8068(2) | 37(1)          |
| O4  | 3912(1)  | 6185(2) | 6780(2) | 48(1)          |
| O5  | 4076(1)  | 8091(2) | 6574(2) | 56(1)          |
| O6  | 9573(1)  | 1174(2) | 3762(2) | 56(1)          |
| O7  | 10421(1) | 1320(2) | 5157(2) | 53(1)          |
| O8  | 7473(1)  | 8233(2) | 4694(1) | 31(1)          |
| O9  | 4839(1)  | 9286(2) | 4044(2) | 38(1)          |
| N1  | 7395(1)  | 5271(2) | 5891(2) | 26(1)          |
| N2  | 4318(1)  | 7054(3) | 6731(2) | 38(1)          |
| N3  | 9774(2)  | 1476(2) | 4601(2) | 39(1)          |
| C2  | 7832(2)  | 6145(3) | 6625(2) | 32(1)          |
| C3  | 7552(2)  | 6178(3) | 7487(2) | 35(1)          |
| C4  | 6689(2)  | 6405(3) | 7228(2) | 31(1)          |
| C5  | 6391(2)  | 7581(3) | 7052(2) | 36(1)          |
| C6  | 5613(2)  | 7808(3) | 6869(2) | 35(1)          |
| C7  | 5140(2)  | 6824(3) | 6870(2) | 31(1)          |
| C8  | 5413(2)  | 5653(3) | 7029(2) | 33(1)          |
| C9  | 6188(2)  | 5454(3) | 7197(2) | 33(1)          |
| C10 | 8692(2)  | 6001(3) | 6875(2) | 35(1)          |
| C11 | 9102(2)  | 6665(3) | 6483(2) | 46(1)          |
| C12 | 7200(2)  | 5728(3) | 4900(2) | 29(1)          |
| C13 | 6576(2)  | 6683(2) | 4702(2) | 26(1)          |
| C14 | 6716(2)  | 7912(2) | 4592(2) | 26(1)          |
| C15 | 6126(2)  | 8754(3) | 4386(2) | 29(1)          |
| C16 | 5379(2)  | 8383(3) | 4285(2) | 29(1)          |
| C17 | 5221(2)  | 7178(3) | 4416(2) | 31(1)          |

|      |         |         |         |       |
|------|---------|---------|---------|-------|
| C18  | 5825(2) | 6351(3) | 4621(2) | 29(1) |
| C19  | 8120(2) | 3138(2) | 5607(2) | 26(1) |
| C20  | 8863(2) | 2978(3) | 6223(2) | 33(1) |
| C21  | 9408(2) | 2429(3) | 5894(2) | 33(1) |
| C22  | 9193(2) | 2060(2) | 4960(2) | 30(1) |
| C23  | 8457(2) | 2208(3) | 4336(2) | 30(1) |
| C24  | 7910(2) | 2750(2) | 4671(2) | 30(1) |
| C25  | 7670(2) | 9494(3) | 4858(2) | 39(1) |
| C26  | 4078(2) | 8977(3) | 4026(2) | 40(1) |
| CI1A | 9148(1) | 5217(1) | 4144(1) | 55(1) |
| CI2A | 7884(1) | 4448(1) | 2520(1) | 71(1) |
| CI3A | 9290(1) | 5281(1) | 2248(1) | 61(1) |
| C1A  | 8668(2) | 5435(3) | 2926(2) | 44(1) |

---

Table 3. Bond lengths [ $\text{\AA}$ ] and angles [ $^\circ$ ] for 3a.

|         |          |          |          |
|---------|----------|----------|----------|
| S1-O1   | 1.430(2) | C10-H10  | 0.95     |
| S1-O2   | 1.431(2) | C11-H11A | 0.95     |
| S1-N1   | 1.624(2) | C11-H11B | 0.95     |
| S1-C19  | 1.786(3) | C12-C13  | 1.511(4) |
| O3-C3   | 1.436(4) | C12-H12A | 0.99     |
| O3-H3O  | 0.90(4)  | C12-H12B | 0.99     |
| O4-N2   | 1.228(3) | C13-C18  | 1.388(4) |
| O5-N2   | 1.221(3) | C13-C14  | 1.398(4) |
| O6-N3   | 1.226(3) | C14-C15  | 1.381(4) |
| O7-N3   | 1.220(3) | C15-C16  | 1.388(4) |
| O8-C14  | 1.390(3) | C15-H15  | 0.95     |
| O8-C25  | 1.437(3) | C16-C17  | 1.386(4) |
| O9-C16  | 1.367(3) | C17-C18  | 1.389(4) |
| O9-C26  | 1.426(3) | C17-H17  | 0.95     |
| N1-C2   | 1.482(4) | C18-H18  | 0.95     |
| N1-C12  | 1.485(3) | C19-C24  | 1.386(4) |
| N2-C7   | 1.472(4) | C19-C20  | 1.386(4) |
| N3-C22  | 1.477(4) | C20-C21  | 1.380(4) |
| C2-C10  | 1.504(4) | C20-H20  | 0.95     |
| C2-C3   | 1.522(4) | C21-C22  | 1.375(4) |
| C2-H2   | 1.0000   | C21-H21  | 0.95     |
| C3-C4   | 1.520(4) | C22-C23  | 1.378(4) |
| C3-H3   | 1.0000   | C23-C24  | 1.385(4) |
| C4-C9   | 1.384(4) | C23-H23  | 0.95     |
| C4-C5   | 1.398(4) | C24-H24  | 0.95     |
| C5-C6   | 1.383(4) | C25-H25A | 0.98     |
| C5-H5   | 0.95     | C25-H25B | 0.98     |
| C6-C7   | 1.387(4) | C25-H25C | 0.98     |
| C6-H6   | 0.95     | C26-H26A | 0.98     |
| C7-C8   | 1.377(4) | C26-H26B | 0.98     |
| C8-C9   | 1.375(4) | C26-H26C | 0.98     |
| C8-H8   | 0.95     | Cl1A-C1A | 1.754(3) |
| C9-H9   | 0.95     | Cl2A-C1A | 1.747(3) |
| C10-C11 | 1.309(4) | Cl3A-C1A | 1.750(3) |

|            |            |               |          |
|------------|------------|---------------|----------|
| C1A-H1A    | 1.00       |               |          |
| O1-S1-O2   | 120.19(13) | C6-C5-H5      | 119.3    |
| O1-S1-N1   | 106.67(12) | C4-C5-H5      | 119.3    |
| O2-S1-N1   | 107.08(12) | C5-C6-C7      | 117.4(3) |
| O1-S1-C19  | 105.53(12) | C5-C6-H6      | 121.3    |
| O2-S1-C19  | 107.15(12) | C7-C6-H6      | 121.3    |
| N1-S1-C19  | 110.04(12) | C8-C7-C6      | 122.7(3) |
| C3-O3-H3O  | 105(2)     | C8-C7-N2      | 118.9(3) |
| C14-O8-C25 | 116.8(2)   | C6-C7-N2      | 118.3(3) |
| C16-O9-C26 | 116.8(2)   | C9-C8-C7      | 118.5(3) |
| C2-N1-C12  | 114.1(2)   | C9-C8-H8      | 120.8    |
| C2-N1-S1   | 124.80(18) | C7-C8-H8      | 120.8    |
| C12-N1-S1  | 116.92(18) | C8-C9-C4      | 121.2(3) |
| O5-N2-O4   | 123.4(3)   | C8-C9-H9      | 119.4    |
| O5-N2-C7   | 118.7(3)   | C4-C9-H9      | 119.4    |
| O4-N2-C7   | 117.9(3)   | C11-C10-C2    | 122.2(3) |
| O7-N3-O6   | 124.0(3)   | C11-C10-H10   | 118.9    |
| O7-N3-C22  | 118.2(3)   | C2-C10-H10    | 118.9    |
| O6-N3-C22  | 117.8(3)   | C10-C11-H11A  | 120.0    |
| N1-C2-C10  | 112.9(2)   | C10-C11-H11B  | 120.0    |
| N1-C2-C3   | 112.7(2)   | H11A-C11-H11B | 120.0    |
| C10-C2-C3  | 113.6(2)   | N1-C12-C13    | 110.9(2) |
| N1-C2-H2   | 105.6      | N1-C12-H12A   | 109.5    |
| C10-C2-H2  | 105.6      | C13-C12-H12A  | 109.5    |
| C3-C2-H2   | 105.6      | N1-C12-H12B   | 109.5    |
| O3-C3-C4   | 110.7(2)   | C13-C12-H12B  | 109.5    |
| O3-C3-C2   | 104.7(2)   | H12A-C12-H12B | 108.1    |
| C4-C3-C2   | 113.0(2)   | C18-C13-C14   | 117.3(3) |
| O3-C3-H3   | 109.4      | C18-C13-C12   | 119.9(2) |
| C4-C3-H3   | 109.4      | C14-C13-C12   | 122.8(2) |
| C2-C3-H3   | 109.4      | C15-C14-O8    | 122.3(2) |
| C9-C4-C5   | 118.7(3)   | C15-C14-C13   | 121.1(3) |
| C9-C4-C3   | 120.4(3)   | O8-C14-C13    | 116.6(2) |
| C5-C4-C3   | 120.8(3)   | C14-C15-C16   | 119.9(3) |
| C6-C5-C4   | 121.4(3)   | C14-C15-H15   | 120.1    |



|             |          |               |            |
|-------------|----------|---------------|------------|
| C16-C15-H15 | 120.1    | C22-C23-H23   | 120.9      |
| O9-C16-C17  | 124.6(3) | C24-C23-H23   | 120.9      |
| O9-C16-C15  | 114.7(2) | C23-C24-C19   | 119.5(3)   |
| C17-C16-C15 | 120.7(3) | C23-C24-H24   | 120.3      |
| C16-C17-C18 | 118.1(3) | C19-C24-H24   | 120.3      |
| C16-C17-H17 | 120.9    | O8-C25-H25A   | 109.5      |
| C18-C17-H17 | 120.9    | O8-C25-H25B   | 109.5      |
| C13-C18-C17 | 122.8(3) | H25A-C25-H25B | 109.5      |
| C13-C18-H18 | 118.6    | O8-C25-H25C   | 109.5      |
| C17-C18-H18 | 118.6    | H25A-C25-H25C | 109.5      |
| C24-C19-C20 | 121.4(2) | H25B-C25-H25C | 109.5      |
| C24-C19-S1  | 118.7(2) | O9-C26-H26A   | 109.5      |
| C20-C19-S1  | 119.8(2) | O9-C26-H26B   | 109.5      |
| C21-C20-C19 | 119.3(3) | H26A-C26-H26B | 109.5      |
| C21-C20-H20 | 120.4    | O9-C26-H26C   | 109.5      |
| C19-C20-H20 | 120.4    | H26A-C26-H26C | 109.5      |
| C22-C21-C20 | 118.7(3) | H26B-C26-H26C | 109.5      |
| C22-C21-H21 | 120.6    | Cl2A-C1A-Cl3A | 110.70(19) |
| C20-C21-H21 | 120.6    | Cl2A-C1A-Cl1A | 110.82(18) |
| C21-C22-C23 | 122.9(3) | Cl3A-C1A-Cl1A | 112.05(18) |
| C21-C22-N3  | 119.0(3) | Cl2A-C1A-H1A  | 107.7      |
| C23-C22-N3  | 118.1(3) | Cl3A-C1A-H1A  | 107.7      |
| C22-C23-C24 | 118.2(3) | Cl1A-C1A-H1A  | 107.7      |

---

Table 4. Anisotropic displacement parameters ( $\text{\AA}^2 \times 10^3$ ) for 3a. The anisotropic displacement factor exponent takes the form:  $-2p^2[ h^2 a^*2U^{11} + \dots + 2 h k a^* b^* U^{12} ]$

|     | U11   | U22   | U33   | U23    | U13   | U12   |
|-----|-------|-------|-------|--------|-------|-------|
| S1  | 30(1) | 27(1) | 31(1) | 4(1)   | 15(1) | 3(1)  |
| O1  | 31(1) | 32(1) | 50(1) | -1(1)  | 20(1) | -3(1) |
| O2  | 50(1) | 36(1) | 33(1) | 9(1)   | 21(1) | 12(1) |
| O3  | 39(1) | 40(1) | 32(1) | -7(1)  | 12(1) | -6(1) |
| O4  | 34(1) | 64(2) | 46(1) | 1(1)   | 12(1) | -7(1) |
| O5  | 38(1) | 49(2) | 76(2) | -15(1) | 13(1) | 10(1) |
| O6  | 53(2) | 74(2) | 50(2) | -12(1) | 27(1) | 11(1) |
| O7  | 33(1) | 68(2) | 59(2) | -5(1)  | 15(1) | 12(1) |
| O8  | 28(1) | 28(1) | 38(1) | 3(1)   | 13(1) | -2(1) |
| O9  | 29(1) | 35(1) | 49(1) | 10(1)  | 13(1) | 6(1)  |
| N1  | 30(1) | 26(1) | 23(1) | 0(1)   | 8(1)  | 2(1)  |
| N2  | 31(1) | 48(2) | 32(1) | -9(1)  | 7(1)  | 1(1)  |
| N3  | 38(2) | 39(2) | 46(2) | 0(1)   | 21(1) | 2(1)  |
| C2  | 30(2) | 33(2) | 33(2) | -2(1)  | 9(1)  | -2(1) |
| C3  | 35(2) | 35(2) | 35(2) | 0(1)   | 11(1) | 0(1)  |
| C4  | 33(2) | 37(2) | 25(1) | -4(1)  | 11(1) | 4(1)  |
| C5  | 37(2) | 38(2) | 36(2) | -2(1)  | 16(1) | -7(1) |
| C6  | 41(2) | 33(2) | 32(2) | -1(1)  | 13(1) | 3(1)  |
| C7  | 28(2) | 40(2) | 26(2) | -3(1)  | 10(1) | 1(1)  |
| C8  | 37(2) | 34(2) | 27(2) | -3(1)  | 11(1) | -5(1) |
| C9  | 36(2) | 33(2) | 31(2) | -3(1)  | 14(1) | 1(1)  |
| C10 | 32(2) | 39(2) | 33(2) | -1(1)  | 10(1) | 2(1)  |
| C11 | 34(2) | 57(2) | 49(2) | 6(2)   | 14(2) | -2(2) |
| C12 | 33(2) | 28(1) | 28(2) | 3(1)   | 15(1) | 2(1)  |
| C13 | 30(2) | 29(1) | 20(1) | 1(1)   | 9(1)  | 1(1)  |
| C14 | 28(1) | 30(2) | 22(1) | 2(1)   | 9(1)  | -1(1) |
| C15 | 32(2) | 25(1) | 29(2) | 3(1)   | 11(1) | -2(1) |
| C16 | 30(2) | 32(2) | 24(1) | 3(1)   | 8(1)  | 3(1)  |
| C17 | 28(2) | 35(2) | 30(2) | 3(1)   | 9(1)  | -3(1) |
| C18 | 34(2) | 28(2) | 26(1) | 1(1)   | 11(1) | -3(1) |
| C19 | 27(1) | 24(1) | 30(2) | 4(1)   | 13(1) | 3(1)  |

|      |       |       |       |       |       |        |
|------|-------|-------|-------|-------|-------|--------|
| C20  | 36(2) | 33(2) | 28(2) | 1(1)  | 8(1)  | 5(1)   |
| C21  | 28(2) | 35(2) | 33(2) | 2(1)  | 7(1)  | 3(1)   |
| C22  | 28(2) | 25(1) | 40(2) | 2(1)  | 17(1) | 1(1)   |
| C23  | 35(2) | 30(2) | 27(2) | -2(1) | 12(1) | 0(1)   |
| C24  | 26(2) | 30(2) | 32(2) | -1(1) | 7(1)  | 1(1)   |
| C25  | 35(2) | 36(2) | 48(2) | -3(1) | 15(2) | -8(1)  |
| C26  | 29(2) | 41(2) | 51(2) | 8(2)  | 14(1) | 7(1)   |
| Cl1A | 52(1) | 66(1) | 44(1) | 3(1)  | 10(1) | -15(1) |
| Cl2A | 55(1) | 89(1) | 57(1) | 17(1) | -1(1) | -28(1) |
| Cl3A | 53(1) | 78(1) | 56(1) | -1(1) | 25(1) | 4(1)   |
| C1A  | 42(2) | 44(2) | 49(2) | 4(2)  | 19(2) | 1(2)   |

---

Table 5. Hydrogen coordinates ( $\times 10^4$ ) and isotropic displacement parameters ( $\text{\AA}^2 \times 10^3$ ) for 3a.

|      | x        | y        | z        | U(eq)  |
|------|----------|----------|----------|--------|
| H2   | 7712     | 6965     | 6324     | 38     |
| H3   | 7684     | 5393     | 7841     | 42     |
| H5   | 6729     | 8238     | 7058     | 43     |
| H6   | 5410     | 8607     | 6748     | 42     |
| H8   | 5074     | 4997     | 7022     | 39     |
| H9   | 6382     | 4648     | 7293     | 39     |
| H10  | 8946     | 5409     | 7333     | 42     |
| H11A | 8857     | 7262     | 6024     | 55     |
| H11B | 9644     | 6550     | 6658     | 55     |
| H12A | 7022     | 5045     | 4449     | 34     |
| H12B | 7667     | 6080     | 4801     | 34     |
| H15  | 6232     | 9586     | 4313     | 34     |
| H17  | 4713     | 6924     | 4368     | 37     |
| H18  | 5720     | 5523     | 4708     | 35     |
| H20  | 8997     | 3243     | 6865     | 39     |
| H21  | 9920     | 2309     | 6304     | 39     |
| H23  | 8328     | 1946     | 3694     | 37     |
| H24  | 7396     | 2854     | 4261     | 36     |
| H25A | 8225     | 9599     | 4977     | 59     |
| H25B | 7535     | 9777     | 5412     | 59     |
| H25C | 7383     | 9967     | 4297     | 59     |
| H26A | 3749     | 9700     | 3874     | 60     |
| H26B | 4093     | 8664     | 4650     | 60     |
| H26C | 3867     | 8353     | 3541     | 60     |
| H1A  | 8462     | 6283     | 2840     | 52     |
| H3O  | 7840(20) | 7130(30) | 8600(30) | 60(11) |

Table 6. Torsion angles [°] for 3a.

|               |            |                 |           |
|---------------|------------|-----------------|-----------|
| O1-S1-N1-C2   | 152.5(2)   | C2-N1-C12-C13   | -72.3(3)  |
| O2-S1-N1-C2   | 22.6(2)    | S1-N1-C12-C13   | 129.4(2)  |
| C19-S1-N1-C2  | -93.5(2)   | N1-C12-C13-C18  | -71.1(3)  |
| O1-S1-N1-C12  | -51.8(2)   | N1-C12-C13-C14  | 109.1(3)  |
| O2-S1-N1-C12  | 178.32(19) | C25-O8-C14-C15  | 18.0(4)   |
| C19-S1-N1-C12 | 62.2(2)    | C25-O8-C14-C13  | -162.4(2) |
| C12-N1-C2-C10 | -91.5(3)   | C18-C13-C14-C15 | -1.6(4)   |
| S1-N1-C2-C10  | 64.7(3)    | C12-C13-C14-C15 | 178.2(2)  |
| C12-N1-C2-C3  | 138.1(2)   | C18-C13-C14-O8  | 178.8(2)  |
| S1-N1-C2-C3   | -65.6(3)   | C12-C13-C14-O8  | -1.4(4)   |
| N1-C2-C3-O3   | -174.4(2)  | O8-C14-C15-C16  | 179.6(2)  |
| C10-C2-C3-O3  | 55.6(3)    | C13-C14-C15-C16 | 0.0(4)    |
| N1-C2-C3-C4   | -53.8(3)   | C26-O9-C16-C17  | 6.7(4)    |
| C10-C2-C3-C4  | 176.3(2)   | C26-O9-C16-C15  | -173.9(2) |
| O3-C3-C4-C9   | -141.7(3)  | C14-C15-C16-O9  | -177.5(2) |
| C2-C3-C4-C9   | 101.1(3)   | C14-C15-C16-C17 | 1.9(4)    |
| O3-C3-C4-C5   | 35.9(4)    | O9-C16-C17-C18  | 177.3(2)  |
| C2-C3-C4-C5   | -81.3(3)   | C15-C16-C17-C18 | -2.0(4)   |
| C9-C4-C5-C6   | 1.4(4)     | C14-C13-C18-C17 | 1.5(4)    |
| C3-C4-C5-C6   | -176.2(3)  | C12-C13-C18-C17 | -178.4(2) |
| C4-C5-C6-C7   | 0.2(4)     | C16-C17-C18-C13 | 0.3(4)    |
| C5-C6-C7-C8   | -1.1(4)    | O1-S1-C19-C24   | 23.0(2)   |
| C5-C6-C7-N2   | 176.6(2)   | O2-S1-C19-C24   | 152.2(2)  |
| O5-N2-C7-C8   | -178.7(3)  | N1-S1-C19-C24   | -91.7(2)  |
| O4-N2-C7-C8   | 1.3(4)     | O1-S1-C19-C20   | -154.9(2) |
| O5-N2-C7-C6   | 3.5(4)     | O2-S1-C19-C20   | -25.7(3)  |
| O4-N2-C7-C6   | -176.5(3)  | N1-S1-C19-C20   | 90.4(2)   |
| C6-C7-C8-C9   | 0.3(4)     | C24-C19-C20-C21 | 0.5(4)    |
| N2-C7-C8-C9   | -177.4(2)  | S1-C19-C20-C21  | 178.3(2)  |
| C7-C8-C9-C4   | 1.4(4)     | C19-C20-C21-C22 | 0.1(4)    |
| C5-C4-C9-C8   | -2.2(4)    | C20-C21-C22-C23 | -0.3(4)   |
| C3-C4-C9-C8   | 175.5(3)   | C20-C21-C22-N3  | 179.8(3)  |
| N1-C2-C10-C11 | 95.9(4)    | O7-N3-C22-C21   | 1.5(4)    |
| C3-C2-C10-C11 | -134.2(3)  | O6-N3-C22-C21   | -178.7(3) |

|                 |           |
|-----------------|-----------|
| O7-N3-C22-C23   | -178.4(3) |
| O6-N3-C22-C23   | 1.3(4)    |
| C21-C22-C23-C24 | -0.3(4)   |
| N3-C22-C23-C24  | 179.7(2)  |
| C22-C23-C24-C19 | 0.9(4)    |
| C20-C19-C24-C23 | -1.0(4)   |
| S1-C19-C24-C23  | -178.9(2) |

Table 7. Hydrogen bonds for 3a [ $\text{\AA}$  and  $^\circ$ ].

| D-H...A        | d(D-H)  | d(H...A) | d(D...A) | $\angle(\text{DHA})$ |
|----------------|---------|----------|----------|----------------------|
| O3-H3O...O8#1  | 0.90(4) | 1.99(4)  | 2.878(3) | 169(3)               |
| C1A-H1A...O3#2 | 1.00    | 2.02     | 2.983(4) | 161.1                |

Symmetry transformations used to generate equivalent atoms:

#1  $x, -y+3/2, z+1/2$  #2  $x, -y+3/2, z-1/2$

## X-Ray Crystallographic Data for **3m**

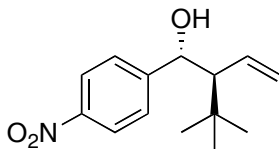

Crystallographic Material for **3m**.

Table 1. Crystallographic Data for **1**.

Table 2. Fractional coordinates and equivalent isotropic thermal parameters ( $\text{\AA}^2$ ) for the non-hydrogen atoms of **1**.

Table 3. Bond Lengths ( $\text{\AA}$ ) and Angles ( $^\circ$ ) for the non-hydrogen atoms of **3m**.

Table 4. Anisotropic thermal parameters for the non-hydrogen atoms of **3m**.

Table 5. Fractional coordinates and isotropic thermal parameters ( $\text{\AA}^2$ ) for the hydrogen atoms of **3m**.

Table 6. Torsion Angles ( $^\circ$ ) for the non-hydrogen atoms of **3m**.

Table 7. H-Bond Lengths ( $\text{\AA}$ ) and Angles ( $^\circ$ ) for **3m**.

Figure 1. View of molecule 1 of **3m** showing the atom labeling scheme. Displacement ellipsoids are scaled to the 50% probability level.

Figure 2. View of molecule 2 of **3m** showing the atom labeling scheme. Displacement ellipsoids are scaled to the 50% probability level.



Figure 1. View of molecule 1 of **3m** showing the atom labeling scheme. Displacement ellipsoids are scaled to the 50% probability level.

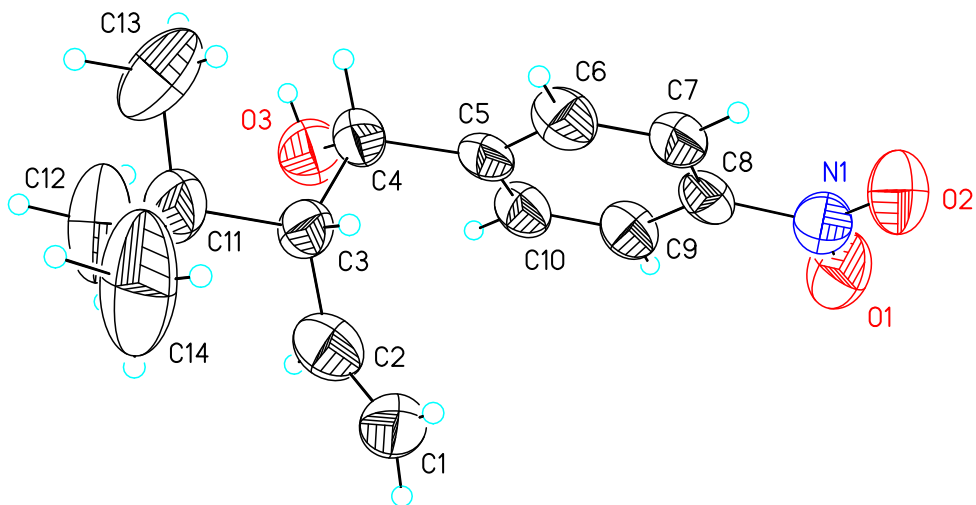

Figure 2. View of molecule 2 of **3m** showing the atom labeling scheme. Displacement ellipsoids are scaled to the 50% probability level.

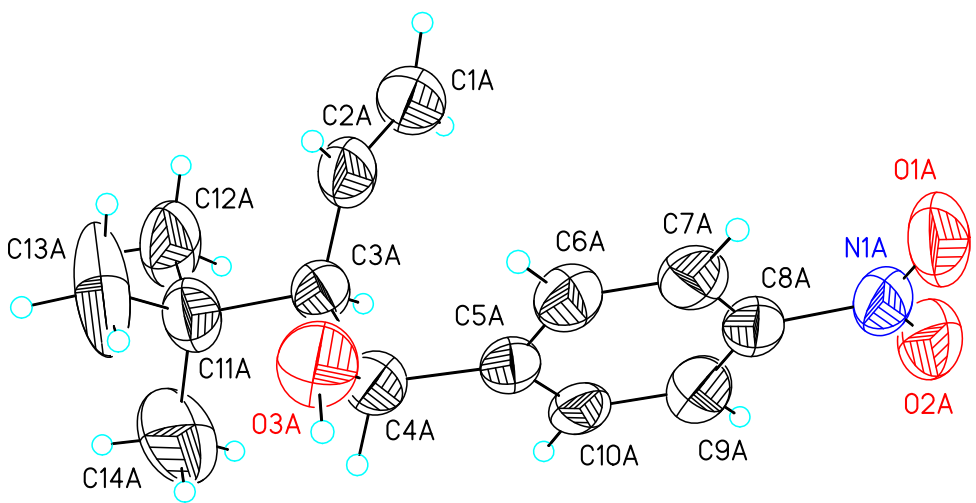

Table 1. Crystal data and structure refinement for 3m.

|                                   |                                                  |          |
|-----------------------------------|--------------------------------------------------|----------|
| Empirical formula                 | C <sub>14</sub> H <sub>19</sub> N O <sub>3</sub> |          |
| Formula weight                    | 249.30                                           |          |
| Temperature                       | 153(2) K                                         |          |
| Wavelength                        | 0.71070 Å                                        |          |
| Crystal system                    | Monoclinic                                       |          |
| Space group                       | P21                                              |          |
| Unit cell dimensions              | a = 15.7991(12) Å                                | a = 90°. |
|                                   | b = 8.3868(9) Å                                  | b = 90°. |
|                                   | c = 21.179(2) Å                                  | g = 90°. |
| Volume                            | 2806.2(5) Å <sup>3</sup>                         |          |
| Z                                 | 8                                                |          |
| Density (calculated)              | 1.180 Mg/m <sup>3</sup>                          |          |
| Absorption coefficient            | 0.083 mm <sup>-1</sup>                           |          |
| F(000)                            | 1072                                             |          |
| Crystal size                      | 0.49 x 0.18 x 0.06 mm                            |          |
| Theta range for data collection   | 1.92 to 25.00°.                                  |          |
| Index ranges                      | -18 ≤ h ≤ 18, -9 ≤ k ≤ 9, -25 ≤ l ≤ 25           |          |
| Reflections collected             | 4662                                             |          |
| Independent reflections           | 2541 [R(int) = 0.0561]                           |          |
| Completeness to theta = 25.00°    | 99.9 %                                           |          |
| Absorption correction             | None                                             |          |
| Refinement method                 | Full-matrix least-squares on F <sup>2</sup>      |          |
| Data / restraints / parameters    | 2541 / 1 / 333                                   |          |
| Goodness-of-fit on F <sup>2</sup> | 1.200                                            |          |
| Final R indices [I > 2σ(I)]       | R1 = 0.0895, wR2 = 0.1909                        |          |
| R indices (all data)              | R1 = 0.1580, wR2 = 0.2199                        |          |
| Absolute structure parameter      | 2(4)                                             |          |
| Largest diff. peak and hole       | 0.630 and -0.190 e.Å <sup>-3</sup>               |          |

Table 2. Atomic coordinates ( $\times 10^4$ ) and equivalent isotropic displacement parameters ( $\text{\AA}^2 \times 10^3$ ) for 3m.  $U(\text{eq})$  is defined as one third of the trace of the orthogonalized  $U_{ij}$  tensor.

|     | x       | y         | z       | $U(\text{eq})$ |
|-----|---------|-----------|---------|----------------|
| O1  | 3377(4) | 6051(9)   | 4891(4) | 84(2)          |
| O2  | 3363(4) | 6171(8)   | 5903(4) | 80(2)          |
| O3  | -267(4) | 1709(8)   | 4810(4) | 74(2)          |
| N1  | 3072(5) | 5724(8)   | 5399(5) | 57(2)          |
| C1  | 1827(6) | -921(11)  | 5222(8) | 100(5)         |
| C2  | 1040(6) | -609(11)  | 5102(5) | 69(3)          |
| C3  | 405(5)  | 0(9)      | 5572(5) | 49(3)          |
| C4  | 122(5)  | 1709(10)  | 5441(5) | 55(2)          |
| C5  | 889(5)  | 2853(9)   | 5417(5) | 51(2)          |
| C6  | 1232(6) | 3393(11)  | 5992(5) | 58(2)          |
| C7  | 1933(5) | 4353(10)  | 5981(5) | 55(2)          |
| C8  | 2299(5) | 4747(9)   | 5413(5) | 48(2)          |
| C9  | 1961(5) | 4229(10)  | 4854(4) | 54(2)          |
| C10 | 1253(6) | 3294(10)  | 4859(4) | 54(2)          |
| C11 | -326(6) | -1184(12) | 5705(6) | 77(3)          |
| C12 | -826(8) | -1620(16) | 5140(6) | 120(5)         |
| C13 | -934(7) | -425(19)  | 6206(7) | 124(5)         |
| C14 | 31(8)   | -2587(16) | 6024(8) | 146(6)         |
| O1A | 4043(5) | 6017(8)   | 3460(4) | 91(2)          |
| O2A | 4091(4) | 6029(9)   | 2439(4) | 90(2)          |
| O3A | 7689(4) | 1775(8)   | 3707(3) | 78(2)          |
| N1A | 4373(5) | 5642(9)   | 2958(6) | 72(2)          |
| C1A | 5632(6) | -971(11)  | 3281(6) | 75(3)          |
| C2A | 6420(6) | -567(11)  | 3402(5) | 65(3)          |
| C3A | 7064(5) | -56(9)    | 2969(5) | 53(3)          |
| C4A | 7327(5) | 1716(10)  | 3086(4) | 56(2)          |
| C5A | 6559(5) | 2798(9)   | 3045(5) | 50(2)          |
| C6A | 6136(6) | 3275(10)  | 3585(5) | 58(2)          |
| C7A | 5440(6) | 4219(10)  | 3570(5) | 57(2)          |

|      |         |           |         |        |
|------|---------|-----------|---------|--------|
| C8A  | 5142(5) | 4667(10)  | 2971(5) | 55(3)  |
| C9A  | 5519(6) | 4246(11)  | 2422(5) | 61(3)  |
| C10A | 6247(5) | 3314(9)   | 2475(5) | 53(2)  |
| C11A | 7828(5) | -1227(11) | 2885(6) | 69(3)  |
| C12A | 7475(7) | -2788(10) | 2611(6) | 93(4)  |
| C13A | 8294(8) | -1497(18) | 3501(6) | 126(6) |
| C14A | 8448(7) | -599(17)  | 2399(6) | 107(4) |

---

Table 3. Bond lengths [ $\text{\AA}$ ] and angles [ $^\circ$ ] for 3m.

|          |           |           |           |
|----------|-----------|-----------|-----------|
| O1-N1    | 1.211(10) | C14-H14D  | 0.98      |
| O2-N1    | 1.220(10) | C14-H14E  | 0.98      |
| O3-C4    | 1.471(11) | C14-H14F  | 0.98      |
| O3-H3O   | 0.84      | O1A-N1A   | 1.225(11) |
| N1-C8    | 1.471(11) | O2A-N1A   | 1.231(11) |
| C1-C2    | 1.297(13) | O3A-C4A   | 1.435(10) |
| C1-H1A   | 0.95      | O3A-H3OA  | 0.84      |
| C1-H1B   | 0.95      | N1A-C8A   | 1.464(12) |
| C2-C3    | 1.503(13) | C1A-C2A   | 1.315(12) |
| C2-H2    | 0.95      | C1A-H1A1  | 0.95      |
| C3-C4    | 1.527(11) | C1A-H1A2  | 0.95      |
| C3-C11   | 1.549(12) | C2A-C3A   | 1.436(13) |
| C3-H3    | 1.00      | C2A-H2A   | 0.95      |
| C4-C5    | 1.547(11) | C3A-C4A   | 1.563(11) |
| C4-H4    | 1.00      | C3A-C11A  | 1.566(11) |
| C5-C10   | 1.365(12) | C3A-H3A   | 1.00      |
| C5-C6    | 1.408(13) | C4A-C5A   | 1.518(11) |
| C6-C7    | 1.369(12) | C4A-H4A   | 1.00      |
| C6-H6    | 0.95      | C5A-C10A  | 1.375(12) |
| C7-C8    | 1.375(13) | C5A-C6A   | 1.384(12) |
| C7-H7    | 0.95      | C6A-C7A   | 1.355(12) |
| C8-C9    | 1.370(12) | C6A-H6A   | 0.95      |
| C9-C10   | 1.367(12) | C7A-C8A   | 1.404(13) |
| C9-H9    | 0.95      | C7A-H7A   | 0.95      |
| C10-H10  | 0.95      | C8A-C9A   | 1.354(13) |
| C11-C14  | 1.469(15) | C9A-C10A  | 1.395(12) |
| C11-C12  | 1.481(16) | C9A-H9A   | 0.95      |
| C11-C13  | 1.566(16) | C10A-H10A | 0.95      |
| C12-H12A | 0.98      | C11A-C14A | 1.515(16) |
| C12-H12B | 0.98      | C11A-C13A | 1.515(16) |
| C12-H12C | 0.98      | C11A-C12A | 1.537(13) |
| C13-H13D | 0.98      | C12A-H12D | 0.98      |
| C13-H13E | 0.98      | C12A-H12E | 0.98      |
| C13-H13F | 0.98      | C12A-H12F | 0.98      |

|            |           |               |           |
|------------|-----------|---------------|-----------|
| C13A-H13A  | 0.98      | C14A-H14A     | 0.98      |
| C13A-H13B  | 0.98      | C14A-H14B     | 0.98      |
| C13A-H13C  | 0.98      | C14A-H14C     | 0.98      |
| C4-O3-H3O  | 109.5     | C9-C8-N1      | 118.9(9)  |
| O1-N1-O2   | 123.9(8)  | C7-C8-N1      | 120.0(9)  |
| O1-N1-C8   | 118.3(9)  | C10-C9-C8     | 119.6(9)  |
| O2-N1-C8   | 117.8(9)  | C10-C9-H9     | 120.2     |
| C2-C1-H1A  | 120.0     | C8-C9-H9      | 120.2     |
| C2-C1-H1B  | 120.0     | C5-C10-C9     | 120.4(8)  |
| H1A-C1-H1B | 120.0     | C5-C10-H10    | 119.8     |
| C1-C2-C3   | 125.3(12) | C9-C10-H10    | 119.8     |
| C1-C2-H2   | 117.3     | C14-C11-C12   | 112.2(10) |
| C3-C2-H2   | 117.3     | C14-C11-C3    | 108.1(8)  |
| C2-C3-C4   | 113.2(8)  | C12-C11-C3    | 114.1(9)  |
| C2-C3-C11  | 113.6(8)  | C14-C11-C13   | 104.5(12) |
| C4-C3-C11  | 114.6(7)  | C12-C11-C13   | 108.8(10) |
| C2-C3-H3   | 104.7     | C3-C11-C13    | 108.7(9)  |
| C4-C3-H3   | 104.7     | C11-C12-H12A  | 109.5     |
| C11-C3-H3  | 104.7     | C11-C12-H12B  | 109.5     |
| O3-C4-C3   | 106.7(7)  | H12A-C12-H12B | 109.5     |
| O3-C4-C5   | 107.3(8)  | C11-C12-H12C  | 109.5     |
| C3-C4-C5   | 111.0(6)  | H12A-C12-H12C | 109.5     |
| O3-C4-H4   | 110.6     | H12B-C12-H12C | 109.5     |
| C3-C4-H4   | 110.6     | C11-C13-H13D  | 109.5     |
| C5-C4-H4   | 110.6     | C11-C13-H13E  | 109.5     |
| C10-C5-C6  | 120.0(7)  | H13D-C13-H13E | 109.5     |
| C10-C5-C4  | 121.8(9)  | C11-C13-H13F  | 109.5     |
| C6-C5-C4   | 118.2(9)  | H13D-C13-H13F | 109.5     |
| C7-C6-C5   | 119.0(9)  | H13E-C13-H13F | 109.5     |
| C7-C6-H6   | 120.5     | C11-C14-H14D  | 109.5     |
| C5-C6-H6   | 120.5     | C11-C14-H14E  | 109.5     |
| C6-C7-C8   | 119.8(9)  | H14D-C14-H14E | 109.5     |
| C6-C7-H7   | 120.1     | C11-C14-H14F  | 109.5     |
| C8-C7-H7   | 120.1     | H14D-C14-H14F | 109.5     |
| C9-C8-C7   | 121.1(7)  | H14E-C14-H14F | 109.5     |

|               |           |                |           |
|---------------|-----------|----------------|-----------|
| C4A-O3A-H3OA  | 109.5     | C9A-C8A-N1A    | 119.6(10) |
| O1A-N1A-O2A   | 123.6(9)  | C7A-C8A-N1A    | 116.4(10) |
| O1A-N1A-C8A   | 118.7(11) | C8A-C9A-C10A   | 116.1(9)  |
| O2A-N1A-C8A   | 117.7(10) | C8A-C9A-H9A    | 121.9     |
| C2A-C1A-H1A1  | 120.0     | C10A-C9A-H9A   | 122.0     |
| C2A-C1A-H1A2  | 120.0     | C5A-C10A-C9A   | 122.9(9)  |
| H1A1-C1A-H1A2 | 120.0     | C5A-C10A-H10A  | 118.6     |
| C1A-C2A-C3A   | 128.6(11) | C9A-C10A-H10A  | 118.6     |
| C1A-C2A-H2A   | 115.7     | C14A-C11A-C13A | 108.8(9)  |
| C3A-C2A-H2A   | 115.7     | C14A-C11A-C12A | 105.9(10) |
| C2A-C3A-C4A   | 111.8(8)  | C13A-C11A-C12A | 111.9(10) |
| C2A-C3A-C11A  | 115.6(8)  | C14A-C11A-C3A  | 111.0(8)  |
| C4A-C3A-C11A  | 114.2(7)  | C13A-C11A-C3A  | 111.7(9)  |
| C2A-C3A-H3A   | 104.6     | C12A-C11A-C3A  | 107.3(7)  |
| C4A-C3A-H3A   | 104.6     | C11A-C12A-H12D | 109.5     |
| C11A-C3A-H3A  | 104.6     | C11A-C12A-H12E | 109.5     |
| O3A-C4A-C5A   | 110.5(7)  | H12D-C12A-H12E | 109.5     |
| O3A-C4A-C3A   | 106.5(7)  | C11A-C12A-H12F | 109.5     |
| C5A-C4A-C3A   | 110.3(6)  | H12D-C12A-H12F | 109.5     |
| O3A-C4A-H4A   | 109.8     | H12E-C12A-H12F | 109.5     |
| C5A-C4A-H4A   | 109.8     | C11A-C13A-H13A | 109.5     |
| C3A-C4A-H4A   | 109.8     | C11A-C13A-H13B | 109.5     |
| C10A-C5A-C6A  | 117.5(7)  | H13A-C13A-H13B | 109.5     |
| C10A-C5A-C4A  | 121.7(9)  | C11A-C13A-H13C | 109.5     |
| C6A-C5A-C4A   | 120.8(8)  | H13A-C13A-H13C | 109.5     |
| C7A-C6A-C5A   | 122.7(9)  | H13B-C13A-H13C | 109.5     |
| C7A-C6A-H6A   | 118.6     | C11A-C14A-H14A | 109.5     |
| C5A-C6A-H6A   | 118.6     | C11A-C14A-H14B | 109.5     |
| C6A-C7A-C8A   | 116.8(9)  | H14A-C14A-H14B | 109.5     |
| C6A-C7A-H7A   | 121.6     | C11A-C14A-H14C | 109.5     |
| C8A-C7A-H7A   | 121.6     | H14A-C14A-H14C | 109.5     |
| C9A-C8A-C7A   | 123.9(8)  | H14B-C14A-H14C | 109.5     |

---

Table 4. Anisotropic displacement parameters ( $\text{\AA}^2 \times 10^3$ ) for 3m. The anisotropic displacement factor exponent takes the form:  $-2p^2[ h^2 a^*2U11 + \dots + 2 h k a^* b^* U12 ]$

|     | U11     | U22     | U33     | U23    | U13     | U12     |
|-----|---------|---------|---------|--------|---------|---------|
| O1  | 74(5)   | 81(5)   | 97(6)   | 20(4)  | 10(4)   | -23(4)  |
| O2  | 76(4)   | 76(5)   | 87(5)   | 6(4)   | -4(4)   | -27(4)  |
| O3  | 60(4)   | 63(4)   | 98(5)   | 2(4)   | -14(4)  | 7(3)    |
| N1  | 54(5)   | 42(4)   | 75(5)   | 9(5)   | -10(5)  | 4(4)    |
| C1  | 58(6)   | 56(6)   | 186(15) | -14(7) | 4(8)    | 6(5)    |
| C2  | 81(7)   | 50(6)   | 77(7)   | 5(6)   | -1(6)   | 5(6)    |
| C3  | 45(5)   | 39(6)   | 62(6)   | 9(4)   | 5(5)    | -1(4)   |
| C4  | 45(5)   | 46(5)   | 75(6)   | -12(5) | -7(5)   | -2(4)   |
| C5  | 49(5)   | 31(4)   | 72(6)   | -9(5)  | -3(5)   | 9(4)    |
| C6  | 71(6)   | 54(6)   | 50(6)   | -6(5)  | 2(5)    | 0(5)    |
| C7  | 50(5)   | 43(5)   | 73(7)   | -12(5) | -3(5)   | 4(5)    |
| C8  | 58(6)   | 29(4)   | 56(5)   | -1(5)  | -3(5)   | 3(4)    |
| C9  | 66(6)   | 45(5)   | 52(6)   | 0(4)   | 0(5)    | -1(5)   |
| C10 | 63(6)   | 38(5)   | 59(6)   | -2(4)  | 1(5)    | 0(4)    |
| C11 | 58(6)   | 52(6)   | 120(10) | 13(6)  | 2(7)    | -2(5)   |
| C12 | 113(10) | 134(11) | 112(10) | 26(9)  | -30(9)  | -67(9)  |
| C13 | 85(8)   | 148(13) | 140(13) | 6(11)  | 58(9)   | -28(9)  |
| C14 | 145(12) | 127(11) | 165(14) | 90(11) | -41(12) | -64(10) |
| O1A | 77(5)   | 66(5)   | 130(7)  | -16(5) | 7(5)    | 23(4)   |
| O2A | 59(4)   | 81(5)   | 131(7)  | 22(5)  | -14(5)  | 15(4)   |
| O3A | 74(5)   | 68(4)   | 92(5)   | -11(4) | -21(4)  | -9(4)   |
| N1A | 53(5)   | 42(4)   | 120(9)  | 5(6)   | 3(6)    | 2(4)    |
| C1A | 56(6)   | 69(7)   | 100(8)  | 8(6)   | -5(6)   | -8(5)   |
| C2A | 55(6)   | 46(5)   | 95(8)   | 2(6)   | -3(6)   | 4(5)    |
| C3A | 49(5)   | 42(5)   | 68(7)   | -3(5)  | -1(5)   | 0(4)    |
| C4A | 51(5)   | 53(5)   | 63(6)   | 3(5)   | -5(5)   | -3(4)   |
| C5A | 43(4)   | 32(4)   | 73(6)   | -1(5)  | -5(5)   | -10(4)  |
| C6A | 62(6)   | 46(5)   | 66(7)   | 1(5)   | -1(5)   | -2(5)   |
| C7A | 60(6)   | 40(5)   | 72(7)   | -8(5)  | 7(5)    | -9(5)   |
| C8A | 43(5)   | 40(5)   | 82(8)   | 2(5)   | -6(6)   | -9(4)   |
| C9A | 66(6)   | 53(6)   | 65(6)   | 2(5)   | -9(5)   | -2(5)   |



|      |        |         |         |        |        |        |
|------|--------|---------|---------|--------|--------|--------|
| C10A | 58(6)  | 32(4)   | 67(6)   | 0(4)   | 14(5)  | -6(4)  |
| C11A | 55(5)  | 61(6)   | 92(8)   | -6(6)  | -3(6)  | 11(5)  |
| C12A | 83(6)  | 52(5)   | 143(10) | -12(6) | -14(8) | 18(6)  |
| C13A | 104(9) | 173(14) | 101(10) | -21(9) | -28(8) | 90(10) |
| C14A | 90(9)  | 131(10) | 101(10) | -27(9) | 29(8)  | 33(9)  |

---

Table 5. Hydrogen coordinates ( $\times 10^4$ ) and isotropic displacement parameters ( $\text{\AA}^2 \times 10^3$ ) for 3m.

|      | x     | y     | z    | U(eq) |
|------|-------|-------|------|-------|
| H3O  | -715  | 2249  | 4818 | 110   |
| H1A  | 2044  | -768  | 5636 | 120   |
| H1B  | 2187  | -1304 | 4897 | 120   |
| H2   | 848   | -778  | 4682 | 83    |
| H3   | 724   | 64    | 5979 | 59    |
| H4   | -295  | 2069  | 5767 | 66    |
| H6   | 981   | 3096  | 6382 | 70    |
| H7   | 2166  | 4745  | 6364 | 67    |
| H9   | 2218  | 4519  | 4464 | 65    |
| H10  | 1012  | 2948  | 4471 | 64    |
| H12A | -458  | -2152 | 4832 | 179   |
| H12B | -1066 | -655  | 4950 | 179   |
| H12C | -1285 | -2343 | 5262 | 179   |
| H13D | -1355 | -1216 | 6338 | 186   |
| H13E | -1222 | 498   | 6021 | 186   |
| H13F | -605  | -81   | 6574 | 186   |
| H14D | -429  | -3242 | 6194 | 218   |
| H14E | 400   | -2239 | 6369 | 218   |
| H14F | 360   | -3215 | 5720 | 218   |
| H3OA | 8016  | 2563  | 3733 | 117   |
| H1A1 | 5427  | -944  | 2859 | 90    |
| H1A2 | 5268  | -1289 | 3614 | 90    |
| H2A  | 6584  | -620  | 3833 | 78    |
| H3A  | 6779  | -45   | 2548 | 64    |
| H4A  | 7758  | 2049  | 2766 | 67    |
| H6A  | 6341  | 2926  | 3984 | 69    |
| H7A  | 5167  | 4561  | 3946 | 69    |
| H9A  | 5301  | 4567  | 2024 | 73    |

|      |      |       |      |     |
|------|------|-------|------|-----|
| H10A | 6539 | 3023  | 2100 | 63  |
| H12D | 7937 | -3557 | 2559 | 139 |
| H12E | 7213 | -2577 | 2200 | 139 |
| H12F | 7051 | -3228 | 2900 | 139 |
| H13A | 7910 | -1989 | 3808 | 189 |
| H13B | 8495 | -473  | 3666 | 189 |
| H13C | 8778 | -2203 | 3428 | 189 |
| H14A | 8882 | -1408 | 2316 | 161 |
| H14B | 8718 | 371   | 2560 | 161 |
| H14C | 8146 | -355  | 2007 | 161 |

---

Table 6. Torsion angles [°] for 3m.

|                  |            |                   |           |
|------------------|------------|-------------------|-----------|
| C1-C2-C3-C4      | 111.8(11)  | C2A-C3A-C4A-C5A   | -56.4(11) |
| C1-C2-C3-C11     | -115.2(11) | C11A-C3A-C4A-C5A  | 169.9(9)  |
| C2-C3-C4-O3      | 60.2(9)    | O3A-C4A-C5A-C10A  | 160.9(7)  |
| C11-C3-C4-O3     | -72.3(10)  | C3A-C4A-C5A-C10A  | -81.5(10) |
| C2-C3-C4-C5      | -56.3(11)  | O3A-C4A-C5A-C6A   | -20.4(10) |
| C11-C3-C4-C5     | 171.2(9)   | C3A-C4A-C5A-C6A   | 97.1(9)   |
| O3-C4-C5-C10     | -19.0(10)  | C10A-C5A-C6A-C7A  | -0.3(12)  |
| C3-C4-C5-C10     | 97.2(10)   | C4A-C5A-C6A-C7A   | -178.9(7) |
| O3-C4-C5-C6      | 163.4(7)   | C5A-C6A-C7A-C8A   | 1.9(13)   |
| C3-C4-C5-C6      | -80.4(10)  | C6A-C7A-C8A-C9A   | -1.8(13)  |
| C10-C5-C6-C7     | -0.3(12)   | C6A-C7A-C8A-N1A   | 178.0(7)  |
| C4-C5-C6-C7      | 177.3(7)   | O1A-N1A-C8A-C9A   | -179.7(9) |
| C5-C6-C7-C8      | -1.3(12)   | O2A-N1A-C8A-C9A   | 0.9(13)   |
| C6-C7-C8-C9      | 1.7(12)    | O1A-N1A-C8A-C7A   | 0.6(12)   |
| C6-C7-C8-N1      | -177.5(7)  | O2A-N1A-C8A-C7A   | -178.9(8) |
| O1-N1-C8-C9      | 0.8(11)    | C7A-C8A-C9A-C10A  | -0.1(13)  |
| O2-N1-C8-C9      | -179.9(8)  | N1A-C8A-C9A-C10A  | -179.8(7) |
| O1-N1-C8-C7      | -179.9(8)  | C6A-C5A-C10A-C9A  | -1.8(11)  |
| O2-N1-C8-C7      | -0.6(11)   | C4A-C5A-C10A-C9A  | 176.9(7)  |
| C7-C8-C9-C10     | -0.5(12)   | C8A-C9A-C10A-C5A  | 2.0(13)   |
| N1-C8-C9-C10     | 178.7(7)   | C2A-C3A-C11A-C14A | 177.6(10) |
| C6-C5-C10-C9     | 1.5(12)    | C4A-C3A-C11A-C14A | -50.6(12) |
| C4-C5-C10-C9     | -176.1(7)  | C2A-C3A-C11A-C13A | -60.7(12) |
| C8-C9-C10-C5     | -1.1(13)   | C4A-C3A-C11A-C13A | 71.1(12)  |
| C2-C3-C11-C14    | 66.4(13)   | C2A-C3A-C11A-C12A | 62.3(12)  |
| C4-C3-C11-C14    | -161.3(11) | C4A-C3A-C11A-C12A | -165.9(9) |
| C2-C3-C11-C12    | -59.2(12)  |                   |           |
| C4-C3-C11-C12    | 73.1(12)   |                   |           |
| C2-C3-C11-C13    | 179.2(10)  |                   |           |
| C4-C3-C11-C13    | -48.5(13)  |                   |           |
| C1A-C2A-C3A-C4A  | 114.0(11)  |                   |           |
| C1A-C2A-C3A-C11A | -113.0(11) |                   |           |
| C2A-C3A-C4A-O3A  | 63.6(9)    |                   |           |
| C11A-C3A-C4A-O3A | -70.1(10)  |                   |           |

---

Symmetry transformations used to generate equivalent atoms:

Table 7. Hydrogen bonds for 3m [ $\text{\AA}$  and  $^\circ$ ].

---

| D-H...A          | d(D-H) | d(H...A) | d(D...A)  | $\angle(\text{DHA})$ |
|------------------|--------|----------|-----------|----------------------|
| O3-H3O...O1#1    | 0.84   | 2.03     | 2.854(9)  | 167.4                |
| O3A-H3OA...O1A#2 | 0.84   | 2.09     | 2.876(10) | 154.8                |

---

Symmetry transformations used to generate equivalent atoms:

#1  $x-1/2, -y+1, z$  #2  $x+1/2, -y+1, z$
